# Supplementary material for: Methylation of Breast Cancer Predisposition Genes in Early-Onset Breast Cancer: Australian Breast Cancer Family Registry
Source: PLoS One. 2016 Nov 30;11(11):e0165436. doi: 10.1371/journal.pone.0165436 (PMC5130174; doi:10.1371/journal.pone.0165436)
Supplement: S1 Data — (CSV) [file pone.0165436.s001.csv]

	Blood_Sample_1	Blood_Sample_2	Blood_Sample_3	Blood_Sample_4	Blood_Sample_5	Blood_Sample_6	Blood_Sample_7	Blood_Sample_8	Blood_Sample_9	Blood_Sample_10	Blood_Sample_11	Blood_Sample_12	Blood_Sample_13	Blood_Sample_14	Blood_Sample_15	Blood_Sample_16	Blood_Sample_17	Blood_Sample_18	Blood_Sample_19	Blood_Sample_20	Blood_Sample_21	Blood_Sample_22	Blood_Sample_23	Blood_Sample_24	Blood_Sample_25	Blood_Sample_26	Blood_Sample_27	Blood_Sample_28	Blood_Sample_29	Blood_Sample_30	Blood_Sample_31	Blood_Sample_32	Blood_Sample_33	Blood_Sample_34	Blood_Sample_35	Blood_Sample_36	Blood_Sample_37	Blood_Sample_38	Blood_Sample_39	Blood_Sample_40	Blood_Sample_41	Blood_Sample_42	Blood_Sample_43	Tumour_Sample_1	Tumour_Sample_2	Tumour_Sample_3	Tumour_Sample_4	Tumour_Sample_5	Tumour_Sample_6
cg25746226	0.142096625	0.163956758	0.130605999	0.117409277	0.164186778	0.129760226	0.176951368	0.083811531	0.130878785	0.087235366	0.098651621	0.105914342	0.090072661	0.103676731	0.104686238	0.127488758	0.097532036	0.097140806	0.094760905	0.075225624	0.095591008	0.101044837	0.1097961	0.100236944	0.119008701	0.073399484	0.107232947	0.107553278	0.126439165	0.090881002	0.130252791	0.107037622	0.133996646	0.084925139	0.078461235	0.092586685	0.065176906	0.07892016	0.117082351	0.098282494	0.08815894	0.09926728	0.105537124	0.08210882	0.068368068	0.056094007	0.082274011	0.052457687	0.07795193
cg17129141	0.043451344	0.054765041	0.041416244	0.026859479	0.072488189	0.050575199	0.055460208	0.045714565	0.035949465	0.028561739	0.020334742	0.04068704	0.025799688	0.036562056	0.044669558	0.023137297	0.034975359	0.034221151	0.031230241	0.031995976	0.028375085	0.026666784	0.046038351	0.032765823	0.037299497	0.033521705	0.039686225	0.041670079	0.029403598	0.035631351	0.038199424	0.031689629	0.045985143	0.028208132	0.02936508	0.045567164	0.032316502	0.028601754	0.022117011	0.031988318	0.029072748	0.041321768	0.037281435	0.06973113	0.06738971	0.068314943	0.061727852	0.054321379	0.079343975
cg22547404	0.056712488	0.062389022	0.045273076	0.050101484	0.066404002	0.063572726	0.077221558	0.048094605	0.045404135	0.046352357	0.037811621	0.033934374	0.051157109	0.060028289	0.045608347	0.046356685	0.054166974	0.044906723	0.040963091	0.043675277	0.047641019	0.04629846	0.053382108	0.049787893	0.054261588	0.039648787	0.073329362	0.047330561	0.041153284	0.06419478	0.049603672	0.055464441	0.076105322	0.052614669	0.041369373	0.061013011	0.037243043	0.054624492	0.051875885	0.03623512	0.056040179	0.043975326	0.060441435	0.100949396	0.067072638	0.063489073	0.062287705	0.062341526	0.052804743
cg25868465	0.069355385	0.081047858	0.085609522	0.089648402	0.059916731	0.074323955	0.073539383	0.08782108	0.080389467	0.073181455	0.077920731	0.095784117	0.078603135	0.083984837	0.070876925	0.078969542	0.092086692	0.109975502	0.078487077	0.079133229	0.069577459	0.092561073	0.075205103	0.057931824	0.093161775	0.07287714	0.071588377	0.067523848	0.081943018	0.087330871	0.078233731	0.07981751	0.080183523	0.077061824	0.067701659	0.082145364	0.066605646	0.084262293	0.062931904	0.076660001	0.070494291	0.068952792	0.08682911	0.05383452	0.153267821	0.079105694	0.079653856	0.043937742	0.058649684
cg22269526	0.095730535	0.084365432	0.103689489	0.119819763	0.110826654	0.125270231	0.115376571	0.088255761	0.11805681	0.091229156	0.08825661	0.109542948	0.094926651	0.10594362	0.089614287	0.091111296	0.127882401	0.161327623	0.090557296	0.085466716	0.082087729	0.104291309	0.094700926	0.076940112	0.137201685	0.101768747	0.0988019	0.110546202	0.07460504	0.118233487	0.102549787	0.070589936	0.160964531	0.070713203	0.102256552	0.165478095	0.088608615	0.084535461	0.09607873	0.118645783	0.107618126	0.071972202	0.144661972	0.100455377	0.050279112	0.100309997	0.082863523	0.114775801	0.093458043
cg06478094	0.063667282	0.044688315	0.054262504	0.039996881	0.083026967	0.112149731	0.064857064	0.046551865	0.053127881	0.061431342	0.047298151	0.067020561	0.056990292	0.063168397	0.041923586	0.028470575	0.045280591	0.053538389	0.043769204	0.030898139	0.049994356	0.064126462	0.047195273	0.057376907	0.049281376	0.035899616	0.049850564	0.03165816	0.040916645	0.049433986	0.050132822	0.053164203	0.074424066	0.033381738	0.042316788	0.046890012	0.050501063	0.032940392	0.040171236	0.053881368	0.061449627	0.05562718	0.062391097	0.094241022	0.089653676	0.0989205	0.126693099	0.094787724	0.073415671
cg00547758	0.027830115	0.031516055	0.032723771	0.034902513	0.029147088	0.035805275	0.035080162	0.027032863	0.037984276	0.028993804	0.040635598	0.036645659	0.034083634	0.039295059	0.043123014	0.050304071	0.039535841	0.042344994	0.039194737	0.043369717	0.026986315	0.037063155	0.043489255	0.04007993	0.039154604	0.049612798	0.042940368	0.032665057	0.029395975	0.043005631	0.046715275	0.034304362	0.039739931	0.032078889	0.036434362	0.042341448	0.033637186	0.046261133	0.041829706	0.042982719	0.027682949	0.040945987	0.039657965	0.03715467	0.035382364	0.025049561	0.04360673	0.052848666	0.017198674
cg14282180	0.065791146	0.048711564	0.056404035	0.057426596	0.084416567	0.067072147	0.05819021	0.054284319	0.060223062	0.04446301	0.044032451	0.05971739	0.049871231	0.066512526	0.050531037	0.060543975	0.054326795	0.050259204	0.056782312	0.060657143	0.052013669	0.045986546	0.058618166	0.052952479	0.095061181	0.07174841	0.060663364	0.068330091	0.051876037	0.068711275	0.056770949	0.054647209	0.063813375	0.054080376	0.05158775	0.058220135	0.047228907	0.048848444	0.043975146	0.071961373	0.049545964	0.046838168	0.046465522	0.071083267	0.058340865	0.059625766	0.061536485	0.063038593	0.048046458
cg03639557	0.078425286	0.04694426	0.043015741	0.055708109	0.075179467	0.089468261	0.087183819	0.052569909	0.042105836	0.046130475	0.06020261	0.04865907	0.048436186	0.050579891	0.042305793	0.041208598	0.048291449	0.039253436	0.037539454	0.050061703	0.046720167	0.048967216	0.051124182	0.047471091	0.08440702	0.043693535	0.044748826	0.058844343	0.044920802	0.044488415	0.04663275	0.060957422	0.056150752	0.057420569	0.045111055	0.065966279	0.041182331	0.041461477	0.040576969	0.067337242	0.054342352	0.045228285	0.065668642	0.07848135	0.063380835	0.075765632	0.069268569	0.046827586	0.078550416
cg11311499	0.048130708	0.090200326	0.055035756	0.043713351	0.081933382	0.093823913	0.131675819	0.054707848	0.058414576	0.04420471	0.055958934	0.067495757	0.056945503	0.058111878	0.05483749	0.073499584	0.056937941	0.054624019	0.053131898	0.06017623	0.05718732	0.052020038	0.054617207	0.049503826	0.051455361	0.049098268	0.053047948	0.068059834	0.053942494	0.069369672	0.051427226	0.05196086	0.049834282	0.054556086	0.038272217	0.054747548	0.05940103	0.053235605	0.049252542	0.062626127	0.068994588	0.054047846	0.081376279	0.060710657	0.054096032	0.05121464	0.056515613	0.061094387	0.057746468
cg02458113	0.05444402	0.026701239	0.062736001	0.037755022	0.048099966	0.051968839	0.052785537	0.04181927	0.032468898	0.044412077	0.042691494	0.037288183	0.04111306	0.033512218	0.050974054	0.041415898	0.054618245	0.05039102	0.040877393	0.038858269	0.037365301	0.024113891	0.04074962	0.041961164	0.037628675	0.021053656	0.05307245	0.058500954	0.038539497	0.051754947	0.080927664	0.036965952	0.054466189	0.051693828	0.034572951	0.048367986	0.054231778	0.031789157	0.040140375	0.043917215	0.037072005	0.044139915	0.058152329	0.083806277	0.038605343	0.075300454	0.208356491	0.026654694	0.036426442
cg09740554	0.16191595	0.077207085	0.145824085	0.216113619	0.115249377	0.160709667	0.117615439	0.098232399	0.108897488	0.082018827	0.171259915	0.107870021	0.102930372	0.159994099	0.111980777	0.11034982	0.118980217	0.114702621	0.16325022	0.110243358	0.115186922	0.13148989	0.129472048	0.131718351	0.100212725	0.126641776	0.101813122	0.128431209	0.093543732	0.106540917	0.103840296	0.137126286	0.159112488	0.130242481	0.09733059	0.110703322	0.090206688	0.13312159	0.088538001	0.108689701	0.102130421	0.378175911	0.119399293	0.093262496	0.090915006	0.195357398	0.200873187	0.056704356	0.050597213
cg23898128	0.904434022	0.854983026	0.875757071	0.954236778	0.91641905	0.887804344	0.90892654	0.924447975	0.885251976	0.921521876	0.937746074	0.970347332	0.945728814	0.939466488	0.915859116	0.928544225	0.94215584	0.956149577	0.940030868	0.940316057	0.943041164	0.964936077	0.960438605	0.933801635	0.924787685	0.939660721	0.921967384	0.951692006	0.93706608	0.922865334	0.935955155	0.933818451	0.952706963	0.944572108	0.951826902	0.930165824	0.939743482	0.928521418	0.952488626	0.911557944	0.956766829	0.934378264	0.893810103	0.784587926	0.923571347	0.857952335	0.863214436	0.84743047	0.861589702
cg19180827	0.552456459	0.615745803	0.516636065	0.727282642	0.598410063	0.558572036	0.542572532	0.668653777	0.666798155	0.616618125	0.678842589	0.611826035	0.728557155	0.657214554	0.663512509	0.602122717	0.701050614	0.661291086	0.671192672	0.719050751	0.580723147	0.647158032	0.622018448	0.605438466	0.636950652	0.607728713	0.670316476	0.643624807	0.670725543	0.613688313	0.627908491	0.710770358	0.571836856	0.649088805	0.663780472	0.633263152	0.716481159	0.650641044	0.623446518	0.602480714	0.657255794	0.530902235	0.613978497	0.755558091	0.766368907	0.699528733	0.761471647	0.710153989	0.777844322
cg05039065	0.091699926	0.127574747	0.09525893	0.093107776	0.157794171	0.161166043	0.137161353	0.070602497	0.088377891	0.067853063	0.073695759	0.05567678	0.088947579	0.084171594	0.071005542	0.069076003	0.089107733	0.072026929	0.047040875	0.089636285	0.094573885	0.066783283	0.072443347	0.09737298	0.08938053	0.071303312	0.074898514	0.104505109	0.071211535	0.087318596	0.107443306	0.077226781	0.101743314	0.058661197	0.06890846	0.104879829	0.071106874	0.079078582	0.080168509	0.094977716	0.07838813	0.083208296	0.091231329	0.074481458	0.077483479	0.080169178	0.14677311	0.074358146	0.076722826
cg02905881	0.043280829	0.062339285	0.062096183	0.037790403	0.075903811	0.07514969	0.056886378	0.041433934	0.056387958	0.025956243	0.03650082	0.028787801	0.040402411	0.045530568	0.043584826	0.041474887	0.052971391	0.031979535	0.050951207	0.023681534	0.047706433	0.045016173	0.049240719	0.025317565	0.054745874	0.025013981	0.047670607	0.053094906	0.041834531	0.029737881	0.058962313	0.029742649	0.028724514	0.040861505	0.035533314	0.044714694	0.036217594	0.030694971	0.037238823	0.05428457	0.047989256	0.099643619	0.059289489	0.097655103	0.041125969	0.080194652	0.070900772	0.049530101	0.086759156
cg11869233	0.064273787	0.064839232	0.082142682	0.040623009	0.107972345	0.070847108	0.08566614	0.04515416	0.052358091	0.049856269	0.039906056	0.050553096	0.037567728	0.042200982	0.037560661	0.0314397	0.041604868	0.040168388	0.047052483	0.036477168	0.054559381	0.047228858	0.03363526	0.033464149	0.064124778	0.043938721	0.066965185	0.057187613	0.037771222	0.037408283	0.042101741	0.030882686	0.056240013	0.044833791	0.037562822	0.059153872	0.046700842	0.042355464	0.04513216	0.035082016	0.033725405	0.039521493	0.060429212	0.04546124	0.045508108	0.030871833	0.087629102	0.050736256	0.070401691
cg09898070	0.264942447	0.265529916	0.253020626	0.289140916	0.306213354	0.280326039	0.31214474	0.235150553	0.278360012	0.283066283	0.268016149	0.252816658	0.292212573	0.278053638	0.266735633	0.264565051	0.282814223	0.277074126	0.284922039	0.273705499	0.269783403	0.319156403	0.291303295	0.256615324	0.239328039	0.279969523	0.291392355	0.284474493	0.295004809	0.295846366	0.283910371	0.281442674	0.262304498	0.270189854	0.249873734	0.282086407	0.28455997	0.237431956	0.28493039	0.252976455	0.271459005	0.28253256	0.27206637	0.177973297	0.141704791	0.176715489	0.25178465	0.167257986	0.138726194
cg16595246	0.194203419	0.185115155	0.186405132	0.156452347	0.290545203	0.272858037	0.21637399	0.151102911	0.150511569	0.162962251	0.159642488	0.139249947	0.169353746	0.167470831	0.153130932	0.168805635	0.1980141	0.165871331	0.124260715	0.145993854	0.178361223	0.139529701	0.177012847	0.168327184	0.188453723	0.137783838	0.138075148	0.177420196	0.150890569	0.177395948	0.147089918	0.180633382	0.218700084	0.127863505	0.145539698	0.162824518	0.159389617	0.164808521	0.15656614	0.183506503	0.154606272	0.173342237	0.171386729	0.218426605	0.187449306	0.15133033	0.25856577	0.147003448	0.104205218
cg18222961	0.084597454	0.10762806	0.064244963	0.077451839	0.092896244	0.095426621	0.08095928	0.074584619	0.073716374	0.100196314	0.080293913	0.070935576	0.106532539	0.086960477	0.092660016	0.091117526	0.096809338	0.091786759	0.091498249	0.051340209	0.103904688	0.096788201	0.058985275	0.099627939	0.073283574	0.087264441	0.105461032	0.076865124	0.067416904	0.0827257	0.086858654	0.085887113	0.104075601	0.054819364	0.085221391	0.091228239	0.066015803	0.076386475	0.106378108	0.099379298	0.085774806	0.10060961	0.097244028	0.186599116	0.173316734	0.154817122	0.193100859	0.113630985	0.107891992
cg00620552	0.054127278	0.043571366	0.039728753	0.040032829	0.056905705	0.065993554	0.056469593	0.03992486	0.041365004	0.033826755	0.049563018	0.070019414	0.050447709	0.047919228	0.045455598	0.038267527	0.043330158	0.036690694	0.041656009	0.045700292	0.051829431	0.041335061	0.044307901	0.049302693	0.063857994	0.028610574	0.051389569	0.057114044	0.054804656	0.047615766	0.041358542	0.035645277	0.04634671	0.043521349	0.03849622	0.054421983	0.048973348	0.046064044	0.047920935	0.061149764	0.02513634	0.056304242	0.043450645	0.11991447	0.088324957	0.07225203	0.105923708	0.071232885	0.055493849
cg21405109	0.027748267	0.027419205	0.030693179	0.02855529	0.044611703	0.036928063	0.038192056	0.035761311	0.030973097	0.028102025	0.04430185	0.038325848	0.037145696	0.040294807	0.03415848	0.028702765	0.034610866	0.025102956	0.029793059	0.041588931	0.032321336	0.029746363	0.04528544	0.019299763	0.036929607	0.024390178	0.035012305	0.036865572	0.031999974	0.038175744	0.025861529	0.032068611	0.036829308	0.024647789	0.025282723	0.042081613	0.02638512	0.038687309	0.036675287	0.042507539	0.035395209	0.023986448	0.034472516	0.180252148	0.101676998	0.069732431	0.114369687	0.075092279	0.040452584
cg19736286	0.062776164	0.047073003	0.065231502	0.079151774	0.078048894	0.112946108	0.074211124	0.052855877	0.058926877	0.05459567	0.076667505	0.103924068	0.068970808	0.068529438	0.070527952	0.052079699	0.096516712	0.070253991	0.059550623	0.068007138	0.055841931	0.067522184	0.0685906	0.059442254	0.097302569	0.065962995	0.080285499	0.084995735	0.054939913	0.090074895	0.065926621	0.054628142	0.066687166	0.057975467	0.042712101	0.081849058	0.043405511	0.072391248	0.055622587	0.065852352	0.079376035	0.064579356	0.070067667	0.215844409	0.131595378	0.067442348	0.14855441	0.105182526	0.069550571
cg19076255	0.010337359	0.014453265	0.0083457	0.01577911	0.017389658	0.023717102	0.017948241	0.022839519	0.016022069	0.011119848	0.021886178	0.023277804	0.016630574	0.016150443	0.020399062	0.017965611	0.019452016	0.025473948	0.020078601	0.017377755	0.020290974	0.018262805	0.021715524	0.013690869	0.026402106	0.014290492	0.012877305	0.009860761	0.010025487	0.019389847	0.014932838	0.008530736	0.030365643	0.023452616	0.015294638	0.026132686	0.011629553	0.013293569	0.015009961	0.027921925	0.020389145	0.016164552	0.020270324	0.058041399	0.028990443	0.014312978	0.0293782	0.027441573	0.017963168
cg07652213	0.023523561	0.019227287	0.025337849	0.014443542	0.03171006	0.022328617	0.024419531	0.020652476	0.02321577	0.029085095	0.022771341	0.017624108	0.017999288	0.029879348	0.016643313	0.017573284	0.034853411	0.028029315	0.028252608	0.027447199	0.025632997	0.023573751	0.014708281	0.009829648	0.023424197	0.022145848	0.020390358	0.012541084	0.01681757	0.030085119	0.022094461	0.020138601	0.031025087	0.022311403	0.019917068	0.041089736	0.018834305	0.029112724	0.011728918	0.024747903	0.014682972	0.025603379	0.025672013	0.080269935	0.040917578	0.048435808	0.034346759	0.035856511	0.028564607
cg15355298	0.204383068	0.137705988	0.155563747	0.090492673	0.293623594	0.352227074	0.357739114	0.176362722	0.173455886	0.202751432	0.184159304	0.195118723	0.129071248	0.171059329	0.184446128	0.188955192	0.135050291	0.144671913	0.200168007	0.174348978	0.137224835	0.151939858	0.219455284	0.158918255	0.266112715	0.098082984	0.17440561	0.150421581	0.11508621	0.157720207	0.140143864	0.07325657	0.229805243	0.177005977	0.126464306	0.188105416	0.305372835	0.150163519	0.099647429	0.236874494	0.18719381	0.159251217	0.170462806	0.151821942	0.098377805	0.052401797	0.11265266	0.116779277	0.097947234
cg19570558	0.765083247	0.710214263	0.745758027	0.783867306	0.682784313	0.667218177	0.79562165	0.788865771	0.687075923	0.770665808	0.746901857	0.736012756	0.770907981	0.754228535	0.807576171	0.816000235	0.768585114	0.751083666	0.751827216	0.797611579	0.720062086	0.769287979	0.761925805	0.776643538	0.795029168	0.715071878	0.751178059	0.71886834	0.706791246	0.77751756	0.794276965	0.818258354	0.781717322	0.767850801	0.713356255	0.801365466	0.811199819	0.756406669	0.689546261	0.786618159	0.813747356	0.702046226	0.800041257	0.46600808	0.768985938	0.447628141	0.727135838	0.618688002	0.422806263
cg02103401	0.638500603	0.529070412	0.603976433	0.689740223	0.657259735	0.452608065	0.559947609	0.719405784	0.619553902	0.628978699	0.764806115	0.561389933	0.693310871	0.737172679	0.768304076	0.782931124	0.553899972	0.7166411	0.705760239	0.690608585	0.706912581	0.689837122	0.748006084	0.611131839	0.668148069	0.633813697	0.757047002	0.711089926	0.790375752	0.786490774	0.655417855	0.808181313	0.671250582	0.698612275	0.641431915	0.742889307	0.719113791	0.737070918	0.715220521	0.748870307	0.723747922	0.735037565	0.724286787	0.414424044	0.602693881	0.757191792	0.463806614	0.178136736	0.249366432
cg24607398	0.827124455	0.744134997	0.816368379	0.805641612	0.741496865	0.75136148	0.801220102	0.836302349	0.771982225	0.848806949	0.80298947	0.781095354	0.77065845	0.821558757	0.815784933	0.877445226	0.770906127	0.8127147	0.776565396	0.793085431	0.825348471	0.787964039	0.824900762	0.79999995	0.808390962	0.762226246	0.845673918	0.815605938	0.874384487	0.839784667	0.795200786	0.842167495	0.82106937	0.778401119	0.701353468	0.786981762	0.834869073	0.842653255	0.832185041	0.823434157	0.788063013	0.82954735	0.780345366	0.470993994	0.414652963	0.867732579	0.593409035	0.278855869	0.375260299
cg10990993	0.675887374	0.726577191	0.682756057	0.73152579	0.654849372	0.604540299	0.626881263	0.725132848	0.690119408	0.772920796	0.776510861	0.636484344	0.703403854	0.734960691	0.766756812	0.840294773	0.693145163	0.767251676	0.704208293	0.682482696	0.80905975	0.752775691	0.768858792	0.715922604	0.700502729	0.662813122	0.731347321	0.719285226	0.642785123	0.802934654	0.75032072	0.743056346	0.750304455	0.74599812	0.742064759	0.786961573	0.773933795	0.704268422	0.73161001	0.731952334	0.739745697	0.795157325	0.726667639	0.347940132	0.399574631	0.827128156	0.593379408	0.282927439	0.212462382
cg04726821	0.225863598	0.200757212	0.258087509	0.275375933	0.247296156	0.204715873	0.258360624	0.210797946	0.174233426	0.307510508	0.244704615	0.242966675	0.228582179	0.208790738	0.209268386	0.31343877	0.212184197	0.212164681	0.201320665	0.216131443	0.266499888	0.215668	0.218971711	0.230415692	0.337820241	0.228740817	0.324511326	0.263721067	0.272818979	0.226695459	0.366695254	0.283318549	0.279405977	0.185801961	0.205360817	0.299807355	0.271577198	0.271505033	0.197675011	0.221281607	0.190561368	0.306861018	0.239930111	0.096496752	0.160555881	0.779362646	0.355151091	0.087466053	0.153270089
cg11291081	0.100380582	0.086955902	0.107820248	0.129231697	0.14602222	0.13206433	0.154144976	0.106220118	0.073575223	0.102780223	0.068613243	0.097558091	0.066736359	0.08983345	0.133537635	0.124947242	0.080294371	0.102131087	0.103378413	0.087870613	0.084521849	0.093128438	0.094710703	0.073577132	0.141902016	0.100558003	0.120083189	0.139592625	0.097847744	0.139153808	0.098954501	0.149218877	0.109221839	0.084647023	0.06746216	0.215478072	0.118572828	0.118055556	0.087922017	0.1058063	0.109234034	0.15554486	0.089036102	0.076733631	0.061896967	0.516194317	0.298922401	0.065305241	0.073906414
cg05670953	0.149847175	0.153526061	0.15211338	0.158401656	0.072600186	0.15184301	0.139238616	0.194522977	0.088853264	0.128598588	0.124662337	0.093004613	0.10997622	0.156499465	0.169446374	0.133516337	0.105374844	0.123760296	0.126897462	0.124946615	0.138577779	0.153177419	0.121128284	0.127277112	0.291866874	0.106947374	0.206004397	0.145964718	0.148192274	0.142867532	0.141717345	0.2714448	0.133765939	0.134321088	0.080742123	0.303625475	0.140730131	0.133867862	0.131514003	0.137228071	0.13473802	0.23093797	0.115234457	0.086468607	0.220929264	0.713394417	0.434278346	0.051825166	0.054815913
cg18320188	0.076497981	0.058481615	0.073223147	0.079957328	0.088324261	0.107222992	0.10176831	0.072559808	0.07768046	0.08757481	0.075650187	0.06476004	0.076210396	0.074505313	0.080031943	0.115626434	0.10313156	0.068399972	0.076957555	0.073952587	0.088480702	0.080541748	0.060318325	0.055971225	0.128827582	0.064931817	0.132282666	0.057333029	0.063672758	0.098748445	0.102025945	0.112733752	0.112885215	0.079778533	0.075298162	0.092477444	0.058923544	0.062122372	0.083513507	0.071636282	0.113195357	0.101363617	0.083652962	0.122093106	0.094174514	0.48243105	0.334650459	0.12248891	0.107689559
cg04841293	0.054140864	0.057794979	0.054011917	0.06405572	0.057150881	0.059371088	0.057625695	0.050212112	0.046343864	0.050606957	0.050060427	0.071633792	0.03251446	0.034472277	0.058149673	0.049374788	0.049907776	0.052977891	0.035763727	0.033620151	0.044600488	0.057670821	0.042162946	0.041358155	0.067795541	0.055269688	0.050620998	0.051931591	0.035029816	0.056447351	0.031849054	0.0569586	0.047024772	0.042916415	0.050501154	0.044680751	0.036937178	0.040179666	0.042474742	0.035953004	0.040877299	0.039521316	0.0560739	0.110306721	0.06497873	0.213088842	0.187052008	0.087948434	0.106829427
cg05845319	0.082772634	0.103029937	0.100756811	0.076380716	0.309764224	0.146732621	0.099564765	0.079088358	0.080398714	0.072444402	0.064862717	0.090999407	0.056614712	0.074469618	0.076870999	0.08037829	0.093099338	0.078581446	0.084203664	0.094382976	0.090072991	0.087326439	0.113559141	0.076506578	0.147773368	0.088625978	0.09234811	0.139068608	0.072830494	0.114142989	0.065295419	0.103865647	0.103861174	0.080216547	0.063923012	0.062038287	0.092589522	0.059202024	0.121192134	0.0980644	0.128479023	0.103838258	0.177137523	0.094078487	0.082987586	0.485946385	0.319547951	0.064342889	0.155666273
cg21109167	0.158964335	0.219313202	0.13353404	0.136590804	0.338519138	0.214259923	0.254418952	0.203301923	0.12095247	0.102078118	0.096664275	0.103768951	0.138716845	0.101111202	0.13463793	0.166460554	0.095184566	0.083263679	0.092154452	0.102007477	0.088531249	0.100043336	0.109308769	0.106599089	0.175807234	0.081989163	0.089678223	0.061517477	0.154454323	0.155931124	0.114891287	0.225977117	0.141515644	0.08789058	0.124102412	0.212430066	0.147056097	0.140828709	0.081506206	0.117904419	0.135681895	0.12329848	0.129324425	0.10357425	0.137572196	0.668985187	0.320103604	0.081318579	0.105954557
cg03901257	0.038213305	0.035497706	0.025717268	0.039279795	0.049463049	0.051617401	0.044371633	0.059005803	0.047946199	0.032158404	0.050717924	0.034988311	0.026748569	0.038461655	0.042286511	0.046464149	0.035584112	0.041177239	0.033548643	0.035879505	0.031645637	0.039649195	0.042849429	0.027343882	0.04863568	0.045442832	0.026700348	0.040107939	0.035005271	0.034459001	0.036043195	0.037573877	0.045512803	0.02999833	0.043834645	0.043408281	0.030622997	0.035837857	0.029803352	0.029234479	0.040722893	0.033702652	0.044632848	0.032976312	0.048094885	0.109598169	0.146631287	0.03886772	0.053628177
cg02279071	0.033399135	0.027310101	0.036667396	0.029290183	0.048164809	0.072106264	0.043617048	0.041691359	0.038311557	0.03577564	0.037206113	0.03439335	0.031392166	0.027548746	0.038670603	0.03866407	0.030825409	0.032054827	0.040635039	0.024765183	0.034877944	0.021900952	0.033671666	0.027781392	0.025238686	0.02851372	0.030276561	0.038154978	0.028595755	0.036062819	0.039678959	0.047674866	0.038853419	0.027726195	0.024514295	0.038089645	0.030841031	0.029335993	0.025779165	0.033750965	0.030222473	0.028959181	0.027666679	0.03954019	0.048203766	0.138289001	0.122957206	0.074457797	0.065046323
cg14751544	0.04771186	0.055124059	0.054600879	0.055865041	0.048494111	0.042116095	0.067667002	0.081316272	0.060133662	0.06113379	0.06361477	0.05965204	0.051988334	0.063718046	0.061992219	0.058897839	0.062666886	0.045532598	0.070055389	0.055714329	0.059705421	0.050540935	0.05795803	0.0570069	0.060798686	0.049384271	0.043066163	0.052687753	0.048895449	0.064399559	0.054665317	0.057486688	0.069011653	0.056552437	0.05879143	0.050950471	0.071541809	0.072052511	0.05003961	0.066883113	0.051470809	0.068109167	0.06148202	0.079755927	0.053872573	0.096632075	0.132898845	0.105244472	0.089693379
cg16764580	0.074320198	0.086866127	0.071597091	0.072568757	0.238654912	0.120088321	0.071364679	0.05392832	0.052304737	0.052066512	0.062562968	0.066351283	0.043769709	0.06229602	0.056158353	0.045872703	0.067494226	0.064256256	0.071385798	0.044558024	0.048355054	0.061915091	0.060626831	0.052175498	0.046048855	0.068006017	0.045286238	0.046424319	0.049690706	0.073039996	0.061920851	0.062703341	0.080584083	0.045394931	0.070830504	0.065878759	0.042870829	0.052999399	0.054857761	0.072915532	0.05920686	0.061196855	0.065750753	0.053334788	0.059522487	0.061354238	0.026062152	0.057984802	0.037691429
cg01302270	0.050442019	0.064194418	0.045919965	0.047882353	0.307865521	0.062245441	0.058175892	0.044592174	0.042980105	0.057313284	0.048674249	0.051362501	0.03977311	0.047531048	0.054708381	0.050855929	0.056710688	0.054574347	0.038499894	0.045904194	0.039243057	0.051594628	0.049531999	0.05067173	0.047762681	0.042019316	0.063274037	0.044743631	0.047452647	0.053241452	0.046579959	0.043220689	0.053112906	0.041205053	0.044407983	0.048677605	0.035401325	0.05100179	0.032814855	0.052101949	0.040591454	0.06272216	0.05613056	0.060182918	0.050822321	0.084660999	0.059110655	0.043748821	0.042290722
cg17641046	0.130435739	0.164814937	0.11146506	0.098889364	0.315378913	0.155476495	0.113524718	0.09347612	0.101670587	0.093016482	0.104495752	0.104883475	0.070986355	0.115122592	0.111596883	0.104351943	0.090589697	0.107594302	0.095919894	0.086463778	0.096419323	0.095639787	0.096217425	0.09911394	0.102641641	0.079226059	0.092979101	0.097947502	0.086227305	0.101790009	0.088803923	0.099171127	0.0978984	0.08428261	0.090901441	0.099363102	0.092689029	0.111296597	0.091342928	0.10984676	0.088317106	0.080622552	0.103206306	0.167540572	0.08008209	0.115158629	0.09498306	0.105277092	0.13238824
cg07101782	0.03366812	0.047308312	0.044244418	0.018031549	0.210691791	0.074923283	0.033504685	0.028116642	0.044486933	0.030253524	0.0192604	0.032790706	0.029636689	0.029642409	0.023420653	0.027246368	0.025323861	0.038161823	0.032376414	0.027896522	0.030396327	0.025389271	0.030579728	0.029210904	0.037652863	0.024518459	0.042478681	0.043632077	0.026636437	0.025599139	0.025835774	0.024372622	0.04195869	0.024829707	0.025883791	0.026428604	0.017034116	0.027654962	0.016169471	0.0329392	0.02954674	0.027909021	0.028229486	0.058384583	0.086038116	0.058215632	0.093407249	0.076802121	0.04273352
cg03497419	0.032659977	0.058936499	0.066257779	0.028671758	0.041962323	0.095760479	0.063560695	0.047103727	0.047556119	0.037751077	0.042624193	0.033739937	0.043217359	0.029005166	0.041901932	0.026262508	0.034087977	0.038709419	0.016788886	0.031861412	0.027918619	0.025381472	0.032125065	0.027477559	0.041213021	0.01621894	0.039816111	0.063827255	0.030905866	0.037182007	0.039389192	0.030966756	0.074770211	0.03884445	0.028248706	0.04649494	0.056952907	0.037817781	0.023103886	0.030844045	0.03603401	0.04201053	0.051759034	0.048397637	0.049648109	0.043447506	0.133545711	0.124996108	0.098548711
cg27586588	0.031380231	0.090609468	0.053506777	0.035287274	0.057615414	0.112624235	0.080062872	0.032321844	0.024274207	0.041683421	0.022367986	0.037164399	0.029774512	0.067770767	0.037998632	0.031629964	0.03514202	0.035131044	0.034620987	0.039439841	0.03492383	0.037655876	0.032864045	0.027949846	0.032536104	0.030971821	0.079048818	0.03551521	0.025360529	0.03861469	0.044859147	0.040415839	0.038559889	0.039397163	0.026562781	0.032058798	0.025797018	0.020818505	0.028017963	0.030655965	0.035832195	0.035960068	0.038043481	0.106944286	0.052038853	0.108360915	0.067832229	0.237703618	0.108145509
cg16433211	0.087228613	0.048366327	0.075595519	0.043270909	0.122658764	0.127803506	0.10639559	0.040149892	0.049649279	0.080211045	0.041033579	0.026022893	0.076419122	0.045334676	0.054546902	0.038076054	0.049259968	0.052029067	0.021882846	0.044552342	0.03726186	0.021104703	0.051565723	0.044235071	0.049813047	0.027930802	0.066638425	0.05611467	0.033218179	0.067383024	0.053558403	0.057930267	0.084093068	0.07748155	0.053478708	0.073378569	0.048942471	0.06173486	0.068258511	0.062812759	0.058074941	0.039500212	0.061582064	0.08681535	0.069932372	0.088297314	0.037450659	0.060429897	0.078297178
cg10769891	0.021174438	0.024118747	0.020334028	0.023276429	0.025359781	0.030999418	0.032804985	0.029317553	0.025614736	0.021260454	0.020836448	0.035459558	0.028682168	0.035330777	0.028232226	0.020210726	0.022718002	0.028624231	0.031648215	0.037354077	0.020171572	0.026927937	0.027399015	0.02171074	0.035127426	0.018428339	0.034550203	0.038498491	0.02127358	0.026489624	0.022049037	0.026435509	0.030267748	0.03175256	0.013876882	0.033600466	0.024218331	0.02176249	0.020173851	0.02142574	0.03022731	0.026242732	0.027474564	0.044627978	0.021915081	0.075314638	0.035053468	0.033950772	0.02875137
cg19132762	0.053868795	0.060711931	0.069515021	0.06704856	0.071948005	0.079378399	0.104043961	0.059102135	0.094299053	0.078479617	0.058774746	0.067801486	0.074145962	0.05263377	0.056057188	0.057860365	0.06822088	0.074056505	0.062947107	0.056905748	0.047446677	0.068351808	0.064093401	0.048163483	0.061730457	0.053881397	0.054302574	0.046803425	0.068322089	0.075099064	0.05215555	0.090236028	0.088880361	0.060800931	0.051149953	0.091614846	0.05092203	0.06306288	0.056743722	0.075810636	0.052054042	0.051597762	0.044412489	0.088101645	0.049842306	0.041025826	0.055783412	0.039981318	0.127667011
cg23658326	0.029011608	0.030259114	0.033302413	0.032930225	0.043061357	0.044655471	0.037147719	0.026443252	0.031328736	0.033711448	0.038338856	0.038152428	0.032161348	0.03911783	0.028701105	0.029158724	0.030284543	0.045704425	0.034148452	0.028315206	0.037382314	0.035624559	0.022094412	0.025980255	0.02420479	0.028068416	0.032591496	0.04233374	0.034886338	0.035732474	0.03548393	0.037061138	0.029652986	0.033709771	0.036314489	0.044534582	0.019948267	0.036439185	0.032538238	0.029329704	0.031691543	0.028542126	0.039610384	0.05783583	0.044082811	0.063510748	0.044605778	0.045668576	0.057426579
cg11600697	0.077877334	0.101751542	0.086261023	0.065774805	0.125660216	0.101571646	0.098728057	0.093895187	0.089883552	0.076014702	0.088072635	0.071394073	0.072269357	0.094242108	0.080870801	0.066527816	0.077932392	0.073833478	0.082195721	0.077404225	0.082997503	0.068596601	0.086038715	0.091817624	0.084263542	0.059474058	0.094657779	0.106781104	0.078408726	0.074060439	0.079772247	0.056107213	0.077564352	0.090221427	0.073397653	0.08438657	0.071244824	0.078164517	0.086974594	0.083118496	0.079359257	0.080211794	0.073727526	0.113865308	0.08469264	0.146940663	0.098881905	0.088771334	0.168866248
cg21490561	0.038265606	0.024588484	0.027627197	0.052763724	0.019842499	0.038769367	0.042855401	0.021567731	0.036018732	0.027694203	0.035903082	0.033588652	0.031057189	0.036460689	0.041051655	0.034091752	0.033627767	0.037682477	0.025093513	0.029942436	0.038322185	0.021383496	0.029863599	0.03129994	0.046524501	0.034999743	0.04746724	0.018009608	0.031391002	0.031906151	0.028633846	0.025358095	0.035082578	0.022153398	0.038900552	0.045581517	0.023339618	0.03926193	0.025369269	0.033617387	0.038102625	0.044135642	0.037861741	0.064874347	0.037149228	0.116023139	0.111950401	0.032662249	0.109654408
cg00893636	0.09178979	0.046300973	0.06251942	0.058668855	0.059633741	0.076600969	0.070389051	0.05444422	0.062670737	0.058038243	0.068195716	0.063545395	0.060216194	0.064169995	0.049445034	0.059006898	0.051449645	0.054730007	0.070969487	0.047084302	0.056781012	0.067202711	0.053379501	0.061493936	0.057282841	0.055764497	0.063646168	0.049572319	0.064343807	0.065045852	0.057327588	0.071380589	0.078976668	0.074427961	0.061111393	0.06951235	0.056871284	0.077474338	0.056959971	0.087443937	0.059850392	0.058889099	0.056861839	0.058077586	0.075090323	0.059287933	0.065579699	0.046627921	0.081114766
cg03192963	0.045188457	0.043999042	0.038411211	0.03484504	0.08002518	0.039334494	0.043871933	0.044743542	0.042262703	0.032721356	0.040640281	0.046868475	0.033672004	0.037787205	0.043382675	0.034812955	0.050905869	0.0566294	0.049077657	0.041226408	0.039433208	0.04786885	0.043380851	0.033349171	0.048221422	0.044030254	0.035260606	0.045316099	0.032896967	0.043134391	0.03972397	0.04112354	0.04072427	0.049469982	0.031489801	0.052976853	0.030151668	0.037516345	0.0349814	0.037598401	0.043365009	0.043937191	0.067041209	0.063106527	0.054895934	0.100376303	0.202425328	0.050422629	0.061645476
cg06791151	0.026262243	0.024521358	0.035326256	0.03029715	0.020764755	0.029786711	0.03266542	0.030484663	0.025205772	0.024327258	0.031413395	0.042056153	0.02784747	0.026060863	0.026997748	0.028288373	0.028033795	0.030479547	0.032205981	0.03237832	0.037325103	0.02652978	0.029082683	0.028139651	0.041292534	0.022994661	0.028133683	0.029618711	0.032273273	0.037149394	0.026504872	0.023353867	0.036330959	0.03103286	0.030944463	0.034847789	0.013338394	0.026540134	0.028735296	0.027395925	0.029823677	0.029820311	0.027095886	0.028128479	0.030175407	0.02107535	0.024016772	0.022360566	0.02494263
cg07064226	0.078591777	0.076905446	0.100504744	0.048565873	0.122424303	0.100280485	0.116101762	0.096491739	0.070045687	0.053342875	0.057059989	0.107559218	0.06822551	0.073536974	0.080841063	0.054920685	0.074607488	0.088655524	0.080905311	0.100573243	0.072786559	0.067975501	0.082877095	0.05670139	0.110794525	0.058321208	0.074601924	0.103847895	0.082281651	0.088443086	0.072111896	0.06251706	0.074844358	0.059466075	0.071257303	0.083325157	0.067772221	0.061575083	0.070668927	0.089976963	0.057184614	0.059698321	0.099808845	0.07429624	0.072916757	0.117774824	0.038754581	0.076346123	0.151571805
cg06108510	0.034325088	0.051458467	0.051929953	0.029616529	0.084733753	0.044485098	0.077145383	0.062133141	0.051623735	0.045317998	0.038283109	0.049037881	0.052139596	0.038954016	0.06317145	0.028327688	0.045285156	0.040048142	0.033316049	0.038733226	0.041496572	0.032688511	0.046756389	0.040533793	0.04910883	0.043775369	0.046381835	0.04746573	0.026423923	0.040149403	0.02988309	0.029845167	0.056922681	0.025362767	0.028784842	0.035780096	0.044567258	0.046616995	0.046901178	0.07132848	0.043740824	0.058866144	0.053285589	0.073062538	0.019758752	0.065926812	0.041434263	0.058426558	0.117985168
cg24985459	0.044194292	0.044563904	0.03800839	0.030054541	0.086196921	0.061116506	0.065889432	0.034820433	0.033797635	0.038178226	0.030081297	0.018383346	0.035918458	0.031363645	0.029228962	0.032090309	0.044450503	0.029916154	0.0258053	0.033081363	0.051327509	0.028633184	0.03607267	0.034364156	0.029279413	0.036881873	0.035114332	0.066164127	0.030764396	0.0159423	0.02728083	0.036749104	0.041970507	0.019888515	0.044439591	0.042539362	0.02994705	0.045089937	0.028197402	0.040187974	0.054963243	0.046981684	0.040431977	0.068937494	0.02604622	0.072312755	0.038751725	0.061405117	0.079191787
cg12790037	0.060604168	0.061472375	0.065715221	0.058596936	0.051059158	0.054057893	0.054526115	0.049084904	0.056210642	0.062066048	0.056909004	0.061502658	0.053307281	0.064181621	0.058981485	0.070396982	0.078145942	0.087801122	0.085034603	0.069630741	0.059480246	0.067103718	0.065774085	0.05460237	0.067561764	0.059185705	0.060431175	0.056553628	0.053906079	0.066499899	0.044878231	0.067194076	0.061545425	0.065903298	0.065271756	0.072960619	0.0750229	0.059467234	0.051765069	0.064073494	0.061496216	0.060990615	0.054643611	0.054683473	0.08154047	0.058295229	0.06284605	0.044323436	0.057535643
cg25202636	0.053664053	0.084672376	0.092968424	0.06601157	0.183197084	0.104514656	0.102802674	0.069578211	0.096637091	0.07188133	0.097571609	0.075431111	0.056105722	0.057085476	0.079363149	0.054974285	0.084550979	0.084952274	0.077677352	0.068985876	0.081788558	0.080258966	0.073201792	0.061781834	0.10143617	0.048994513	0.079481821	0.097899657	0.061593378	0.072204693	0.062979721	0.055726885	0.094082379	0.045502164	0.059330454	0.090451803	0.08378219	0.06131413	0.056355195	0.091286302	0.073628278	0.089086796	0.09733886	0.124481758	0.058868971	0.071315391	0.076012081	0.158631668	0.142619654
cg17621259	0.019048122	0.027365078	0.020852421	0.017258833	0.022148346	0.022126412	0.017945386	0.02799885	0.022139316	0.021687938	0.016023134	0.019049562	0.023578624	0.028050234	0.017304336	0.017213146	0.025901877	0.01270846	0.022385706	0.02507471	0.021257668	0.025099181	0.016998018	0.020091598	0.026390546	0.024154705	0.020834776	0.020637207	0.022967998	0.021429401	0.005699873	0.023138835	0.029561929	0.011554196	0.016616159	0.021201645	0.016726386	0.021400387	0.019959794	0.031216896	0.028133994	0.025110462	0.020833465	0.053020149	0.047081578	0.056496743	0.039928137	0.028933043	0.035325738
cg14671526	0.036758676	0.031229816	0.060864328	0.021735485	0.046167225	0.040261658	0.06564535	0.026680405	0.041381203	0.031439455	0.032976447	0.055434301	0.013348959	0.035230562	0.027735231	0.015285127	0.037895275	0.033033334	0.03220641	0.038075502	0.025395991	0.031631864	0.038510575	0.026222387	0.023105007	0.029348834	0.034579916	0.046233236	0.028137592	0.035944725	0.044836063	0.022999575	0.040625982	0.014038103	0.018596208	0.030741823	0.059032828	0.040306499	0.029416224	0.027263688	0.015239497	0.041700577	0.035025877	0.055704042	0.042888294	0.040036514	0.040309731	0.059044477	0.044499412
cg05906740	0.04261945	0.072647205	0.068565294	0.051026704	0.079398132	0.133729668	0.068053273	0.05619531	0.065215969	0.042587187	0.058084071	0.068548414	0.057586575	0.068091833	0.057849167	0.05741027	0.05298425	0.058392765	0.065435027	0.06323102	0.051265662	0.048338818	0.066033798	0.051015123	0.066647852	0.050537376	0.056722983	0.079798583	0.062225607	0.051535125	0.055494917	0.05060157	0.056467449	0.044882119	0.042814274	0.065912356	0.046803226	0.056637702	0.037930924	0.066543771	0.058493093	0.050910221	0.07649334	0.059161291	0.048487579	0.03959037	0.051587861	0.047209366	0.044272695
cg27331401	0.090775495	0.082233475	0.066017847	0.056677169	0.096732893	0.080515497	0.081494333	0.063910088	0.071608359	0.077125624	0.067782033	0.075593645	0.080993494	0.079258871	0.084759742	0.064994459	0.077880764	0.072593635	0.078064551	0.062502412	0.081516642	0.070456193	0.079823139	0.073731635	0.074088466	0.065535557	0.071550162	0.072835344	0.066257948	0.083859935	0.082184432	0.072523436	0.074794155	0.077863153	0.057888416	0.065890488	0.042600721	0.072713633	0.071248909	0.082639962	0.077378409	0.078723071	0.075945638	0.06605439	0.082160994	0.076557617	0.100832071	0.072543971	0.069577319
cg25837710	0.017732685	0.017288646	0.024394977	0.013468981	0.024221613	0.028090054	0.027663728	0.018836891	0.021223895	0.010711531	0.0185308	0.027768498	0.021731565	0.027186734	0.019909368	0.013131499	0.022922681	0.012832065	0.020587944	0.023363874	0.0248298	0.025900901	0.029378521	0.022310459	0.026391026	0.021142586	0.02588262	0.027304698	0.023363661	0.026263241	0.018525433	0.016716843	0.023235467	0.016193934	0.022581627	0.0241319	0.020392075	0.016132195	0.012352462	0.019181998	0.01188181	0.019897147	0.019185194	0.020230193	0.030988132	0.02150602	0.016960165	0.031914928	0.033283564
cg12851504	0.054849077	0.048370079	0.057876999	0.063907355	0.069902887	0.053157887	0.068841738	0.061593195	0.057701998	0.047708368	0.052265606	0.049696313	0.049929175	0.05583147	0.056497331	0.054057742	0.053993667	0.055132889	0.048622279	0.041063962	0.053121412	0.05470067	0.048523403	0.055514035	0.05327073	0.047849105	0.044367111	0.057244045	0.04808919	0.056306573	0.057934466	0.057493025	0.061263393	0.058836839	0.04656345	0.054110183	0.041181709	0.049200341	0.055348341	0.054531706	0.054377565	0.052349415	0.059407849	0.068397005	0.061645505	0.056351513	0.051438306	0.051586541	0.060461354
cg06590608	0.044261049	0.042725058	0.022456177	0.024611301	0.045375903	0.028851873	0.039411809	0.039274175	0.036483268	0.02104937	0.033761104	0.0313195	0.036705398	0.020324345	0.024611132	0.021093279	0.033244565	0.035311964	0.031779878	0.034311786	0.03651968	0.032257593	0.022476238	0.041515649	0.027538635	0.022996426	0.031016579	0.027913058	0.029432755	0.032015437	0.033082368	0.030040523	0.038407053	0.032990334	0.022797201	0.037151567	0.029948433	0.037154574	0.028703503	0.029103619	0.02468323	0.029179196	0.037579229	0.168319534	0.103502399	0.094461379	0.073432122	0.086808114	0.070221128
cg11224603	0.074181597	0.059495619	0.051623258	0.051538331	0.095168059	0.075089892	0.060405355	0.046416051	0.049853661	0.056477713	0.037764947	0.039294591	0.055722165	0.05175471	0.050846391	0.043644035	0.048277228	0.054274525	0.049997022	0.031769292	0.044780588	0.056624947	0.039060092	0.056376667	0.056249915	0.04290404	0.040948136	0.054056598	0.041190717	0.053602952	0.054450574	0.045203872	0.074958422	0.044550576	0.038154036	0.057686654	0.042231294	0.053126854	0.048709941	0.056896169	0.0463243	0.036719334	0.051503513	0.089775564	0.099825764	0.081501292	0.075759047	0.082040752	0.059653954
cg19208331	0.042007189	0.114777191	0.040645028	0.067049762	0.07561045	0.073875136	0.05247899	0.061219859	0.06479406	0.058218102	0.067484475	0.07855206	0.062353734	0.058895468	0.062017475	0.065645513	0.09263822	0.079912377	0.046317223	0.065353772	0.055927308	0.070027074	0.061746437	0.070929009	0.051718011	0.052497815	0.059068335	0.080556	0.061372797	0.05891096	0.071298653	0.06563023	0.071480953	0.062835447	0.047903736	0.106906821	0.051503532	0.078717439	0.052877704	0.063081593	0.051138556	0.079080386	0.066349363	0.06199879	0.129577091	0.067453754	0.19418843	0.061031517	0.071448822
cg14598950	0.032234768	0.040876747	0.047481504	0.026939367	0.064726879	0.042892622	0.050015802	0.034043529	0.030107884	0.029419756	0.028868377	0.035048272	0.018292386	0.024789539	0.037600247	0.025393205	0.070506976	0.029846834	0.037347143	0.032276139	0.080920501	0.039574856	0.029836952	0.025884981	0.025932961	0.029075149	0.031983326	0.037179711	0.035543457	0.026093658	0.028449756	0.025618199	0.040859644	0.022930791	0.039410423	0.037942234	0.023569872	0.021648631	0.04822844	0.055583147	0.023168768	0.032180984	0.042824467	0.060623234	0.029458145	0.030199141	0.030764114	0.047057786	0.046222113
cg13846866	0.077939708	0.094410636	0.107170207	0.035934867	0.173790429	0.178052213	0.173993542	0.074378051	0.087280398	0.048004367	0.056072597	0.137288522	0.061056146	0.068637272	0.086479594	0.02792931	0.067594224	0.068375563	0.064633171	0.084975065	0.067315361	0.054489407	0.122864441	0.039492234	0.093566519	0.066229997	0.100550935	0.135300307	0.075569824	0.081775039	0.071383096	0.055336407	0.104136986	0.083038021	0.053434825	0.090717135	0.071197247	0.08278213	0.054466363	0.101362765	0.073783705	0.098197568	0.085049143	0.054950413	0.061023921	0.089104162	0.059814381	0.055191676	0.09488525
cg04777024	0.900258082	0.900725612	0.924387221	0.907791788	0.89111652	0.904393098	0.890060961	0.891101359	0.891303182	0.914590362	0.911721301	0.905877959	0.906643511	0.885120466	0.889604351	0.884590004	0.899130005	0.901915199	0.887768837	0.882797507	0.884932447	0.903042639	0.920499348	0.882708408	0.896101809	0.919072372	0.903339475	0.894352562	0.900834216	0.910427462	0.877007329	0.900260533	0.875495569	0.914856775	0.89056904	0.93080692	0.913872048	0.909143454	0.911448891	0.87527641	0.934623969	0.890527729	0.903522435	0.716898401	0.83386794	0.838064927	0.848327958	0.83802931	0.776928139
cg17024523	0.944239554	0.932154547	0.920866701	0.940359645	0.936459358	0.941682189	0.917096906	0.935688747	0.929266117	0.940081633	0.941851809	0.934394672	0.937267074	0.925418351	0.920577369	0.939745922	0.914643076	0.939023564	0.929604707	0.931377694	0.924476535	0.917927069	0.941413393	0.942446146	0.932828391	0.931549193	0.924803566	0.917974078	0.948122546	0.938418442	0.943567916	0.93007374	0.922205178	0.928944566	0.928751948	0.933367657	0.94792597	0.920451322	0.945754816	0.921860883	0.947509667	0.944210879	0.923849379	0.714461955	0.800990328	0.841256086	0.849220652	0.787576438	0.788928733
ch.3.753362R	0.141782196	0.153456885	0.144075172	0.177964459	0.222182826	0.180122788	0.211004656	0.139618593	0.183777889	0.167776206	0.189468039	0.288097979	0.151334049	0.198447213	0.178348461	0.164841038	0.175688827	0.234032659	0.177483401	0.234560996	0.164475024	0.172176051	0.30068544	0.169880794	0.221884434	0.163614955	0.222909941	0.27131159	0.155066466	0.17263138	0.178470524	0.166522229	0.158620226	0.178653816	0.166439587	0.173101908	0.195436752	0.20503394	0.159192114	0.201758765	0.14421301	0.185391358	0.229355498	0.104446899	0.116014211	0.114086472	0.115155965	0.108584725	0.119537058
cg25212762	0.902092936	0.901968536	0.893999111	0.957119722	0.848935759	0.858085006	0.854817083	0.930951604	0.934890201	0.951548882	0.917043042	0.847538847	0.892181381	0.926484582	0.943059325	0.95098657	0.904628077	0.931071727	0.989672019	0.94513463	0.950751659	0.904330019	0.907908532	0.946559009	0.895067274	0.966958047	0.946616237	0.881322938	0.976172586	0.915095557	0.9420316	0.984427053	0.909291906	0.947349423	0.965966918	0.91820395	0.91086845	0.959924531	0.950458821	0.899088309	0.949501313	0.924002594	0.903434077	0.971400644	0.972563031	0.894576514	0.978032587	0.960334271	0.936050339
cg11363877	0.946051847	0.952626019	0.955305217	0.951843983	0.947091726	0.916560953	0.90033824	0.938515118	0.963225811	0.943151346	0.949527334	0.952880211	0.93507605	0.949328267	0.952554962	0.940396306	0.954326266	0.958401621	0.953358025	0.946763899	0.936789861	0.936083897	0.938986268	0.957418136	0.950518832	0.966126092	0.941559936	0.95354973	0.954666252	0.947071058	0.957667077	0.94295855	0.94994382	0.946942918	0.94718944	0.954474622	0.95610224	0.947928021	0.95850413	0.959162549	0.950270899	0.950179941	0.946922248	0.897866935	0.891564838	0.957821598	0.921601114	0.949807033	0.867599041
cg03405026	0.878613833	0.843499345	0.920830865	0.927319804	0.874185388	0.861713085	0.859983777	0.894627198	0.917811085	0.904778487	0.923672241	0.936767157	0.929372526	0.910424731	0.92062409	0.946355605	0.918779584	0.935666482	0.944541947	0.9412378	0.912012862	0.924238125	0.937091465	0.924966978	0.941547281	0.936387794	0.935761315	0.906203552	0.924682895	0.90957306	0.931581208	0.935847101	0.909044504	0.92876162	0.915156381	0.882873994	0.935926037	0.95408719	0.933069867	0.900106509	0.931782586	0.931649022	0.928132926	0.55981624	0.676538744	0.783806532	0.7228552	0.698615517	0.564784333
cg02133350	0.625640138	0.637289614	0.76900475	0.84356693	0.704528583	0.642203506	0.725887146	0.758236609	0.807057576	0.776079025	0.826362089	0.830558591	0.725206152	0.83348968	0.780283269	0.827503697	0.803432804	0.884984808	0.839184778	0.858063936	0.742315353	0.810593191	0.800443979	0.753908613	0.818229059	0.808855415	0.813743262	0.804407149	0.781253323	0.819721074	0.731097067	0.835456007	0.787688424	0.814572097	0.750712291	0.829616694	0.798856108	0.852591054	0.761611454	0.739795984	0.793106239	0.789717479	0.806710372	0.422626287	0.413800968	0.469984588	0.378227786	0.451563623	0.382146244
cg06586813	0.893443814	0.891802484	0.897229073	0.926424854	0.930051749	0.912784427	0.913269176	0.90170738	0.903511591	0.883088754	0.880430806	0.888310545	0.921268078	0.881467716	0.909591371	0.923441477	0.920953769	0.858754077	0.911131898	0.891674492	0.902748384	0.88984859	0.905059527	0.908682829	0.892273249	0.915182946	0.896415334	0.906850281	0.898312614	0.908642981	0.909986744	0.876345699	0.903752738	0.881053269	0.913649128	0.885057383	0.92592469	0.901574959	0.900462772	0.889542681	0.93082333	0.901062015	0.903403912	0.785677934	0.839388592	0.849862298	0.79330684	0.808558725	0.784440044
cg17364580	0.839827749	0.874561734	0.869242619	0.889311121	0.868110497	0.895497425	0.873972335	0.897481681	0.890588049	0.879228449	0.894385371	0.878670328	0.890885353	0.872749468	0.903837603	0.859654864	0.863824411	0.884033106	0.87517197	0.883129252	0.872198388	0.883392945	0.891578621	0.903905733	0.888657319	0.888073934	0.87520365	0.888713235	0.865680585	0.887923669	0.882826197	0.857572982	0.893563015	0.881794476	0.881241066	0.888785096	0.904079291	0.89860438	0.89958554	0.889948301	0.883869405	0.890785753	0.896344973	0.794125774	0.81349899	0.851689717	0.765654824	0.811890781	0.802343112
cg08738770	0.851310358	0.855796677	0.859351728	0.880991683	0.888489388	0.879051599	0.899508686	0.902148123	0.864065334	0.914099592	0.887613177	0.872763199	0.898762283	0.883007925	0.888195329	0.893223708	0.905031257	0.864700467	0.891775525	0.893664139	0.89928228	0.894776934	0.865648308	0.88816323	0.909919864	0.865439218	0.901351466	0.895534727	0.882433129	0.914139295	0.89575153	0.902924053	0.877601334	0.852742498	0.891605342	0.888314311	0.902351543	0.915753894	0.911712223	0.892406158	0.916452333	0.896256918	0.907447894	0.827017724	0.896185249	0.867460745	0.88217233	0.888862647	0.912180405
cg19570749	0.950539889	0.95454501	0.96518912	0.940369387	0.946507357	0.974180588	0.944360111	0.961485491	0.944369608	0.966326053	0.947068864	0.964292928	0.927527696	0.949493808	0.966386977	0.936781873	0.948370596	0.952610776	0.929017494	0.948422363	0.955666491	0.949204269	0.935975005	0.934327083	0.960362222	0.943055262	0.943092691	0.948569977	0.953109207	0.949393488	0.966579063	0.940714536	0.920452356	0.955861304	0.956294914	0.938149044	0.93814897	0.959436281	0.950090466	0.955412485	0.962108546	0.941540406	0.952750587	0.783016652	0.437926157	0.30692867	0.820524469	0.814399994	0.298317932
cg09793796	0.76111559	0.766324717	0.779206244	0.776589871	0.758671676	0.713756351	0.763536276	0.752759904	0.76761396	0.756337511	0.78164269	0.806400008	0.736878916	0.77733094	0.784217408	0.761047487	0.772283732	0.783020321	0.733755466	0.803703077	0.751506257	0.769337781	0.759296655	0.752630205	0.754442894	0.761482479	0.776456515	0.802834629	0.77721592	0.77770189	0.756157894	0.760652813	0.737896459	0.772659197	0.738252119	0.753130485	0.773188267	0.771172004	0.736333296	0.740887953	0.775610807	0.782583328	0.806710802	0.351655747	0.420927459	0.481385386	0.440300898	0.327215512	0.295046796
cg04317940	0.049168609	0.036084033	0.038785782	0.04170983	0.044420597	0.058402169	0.052479585	0.045430135	0.037272697	0.030173224	0.031607069	0.039339851	0.034565366	0.052517642	0.050297638	0.037581243	0.045368639	0.028889263	0.034643378	0.027718723	0.041316197	0.044178627	0.032488481	0.0346985	0.045945119	0.036106462	0.054331429	0.052352094	0.033283528	0.039332682	0.024038856	0.041769084	0.04423528	0.030033541	0.035860916	0.043229361	0.054147563	0.039562382	0.038288673	0.053880419	0.048201602	0.039022071	0.043700416	0.052340915	0.049411484	0.024413266	0.074780545	0.033402423	0.07132248
cg12997166	0.060066438	0.029939914	0.035690528	0.043524237	0.067278328	0.095992279	0.062508705	0.030908408	0.043912932	0.038774686	0.035756756	0.046473526	0.038636668	0.036016618	0.037739744	0.050253125	0.047796339	0.041572472	0.043459666	0.051729037	0.031149463	0.048548978	0.048792553	0.031506738	0.065326284	0.03163892	0.035396641	0.037868774	0.042545568	0.053557662	0.044276827	0.033943378	0.070499604	0.024769399	0.02532159	0.058450665	0.039011853	0.037456518	0.045087504	0.037867305	0.031311607	0.037535081	0.047719076	0.168133441	0.076514316	0.104379135	0.101544723	0.128511396	0.086304462
cg21288207	0.091038479	0.083430897	0.086837145	0.114835824	0.089495969	0.102154949	0.087505709	0.110225076	0.117580486	0.103380661	0.103533717	0.1128617	0.102022738	0.13148718	0.10284661	0.117723502	0.113829897	0.12935235	0.108554796	0.124444261	0.099282972	0.104987021	0.112046764	0.094395557	0.103344864	0.088405529	0.113450879	0.113006389	0.105978072	0.135846652	0.093935866	0.1293982	0.135670347	0.102479603	0.090512546	0.128906861	0.120793862	0.139197136	0.103335917	0.103530926	0.09522136	0.093799001	0.120934132	0.139643666	0.10581131	0.088873612	0.093207673	0.131709561	0.081006462
cg16595953	0.100905367	0.082262676	0.086172284	0.050501838	0.083403262	0.078792291	0.093231414	0.072211797	0.077806302	0.074479083	0.068411543	0.102591882	0.097817205	0.07782169	0.09255036	0.050433411	0.083178069	0.073627079	0.059164262	0.107349926	0.088854462	0.075867525	0.093621338	0.088036662	0.09860959	0.067342444	0.08839484	0.106388142	0.066959155	0.080784582	0.085975545	0.058890024	0.072728586	0.080385872	0.081984096	0.080726049	0.083298722	0.061343035	0.048554506	0.078134949	0.082839633	0.086018359	0.079624337	0.127973517	0.088305562	0.107813046	0.121708624	0.178503558	0.09521601
cg14779627	0.024954229	0.043438802	0.027620576	0.027091027	0.026336442	0.03874681	0.018884756	0.044609396	0.035327336	0.024759645	0.022581627	0.039948735	0.032087596	0.028597804	0.043704774	0.028862885	0.035440568	0.02309477	0.038405647	0.028378604	0.023463903	0.038486407	0.02959771	0.021877114	0.019859729	0.02300381	0.0318502	0.02937068	0.034326158	0.036865579	0.027171016	0.033829714	0.056526546	0.036845548	0.02990779	0.038156503	0.030723359	0.035454306	0.031946897	0.04820604	0.037555424	0.039351994	0.033456878	0.116493008	0.067537785	0.088851122	0.044478902	0.087877156	0.034606922
cg25403084	0.014861067	0.017739094	0.01377647	0.026996267	0.017235989	0.022198824	0.017146465	0.022411806	0.023189053	0.024412353	0.023058456	0.028674715	0.019436899	0.025017238	0.023374623	0.022472504	0.025970093	0.019248433	0.027354524	0.021898269	0.012232765	0.024034708	0.021960599	0.026492679	0.027879475	0.011483001	0.022085613	0.029510126	0.022003254	0.022827546	0.018801965	0.023688148	0.022226353	0.022266215	0.013084063	0.020282753	0.013482739	0.023226041	0.017405835	0.031512747	0.017859652	0.027504613	0.021555495	0.042211305	0.050701268	0.026170716	0.039566223	0.03978546	0.019135988
cg15985338	0.099901537	0.123181795	0.129860959	0.179114664	0.152197686	0.162678297	0.124272689	0.143990694	0.130918866	0.140242848	0.141787755	0.13021355	0.141194799	0.137289231	0.149817736	0.176098087	0.190340819	0.173318989	0.160052247	0.140999067	0.139952792	0.177313796	0.113462533	0.143491816	0.14465887	0.162108105	0.134114944	0.130793019	0.147078343	0.191746877	0.154167731	0.177570187	0.171300596	0.163154434	0.129009815	0.178929065	0.105597234	0.174048832	0.146525133	0.143422753	0.153642331	0.147078106	0.169787396	0.128440104	0.164481027	0.087162278	0.122318354	0.112315139	0.081658136
cg25495217	0.016006679	0.021603231	0.018147245	0.027532817	0.016658777	0.024223788	0.023132626	0.015890975	0.022713367	0.023847897	0.020645657	0.027013602	0.022169405	0.022364702	0.022290527	0.015836062	0.026879922	0.028925625	0.031676527	0.023828704	0.017505508	0.027142717	0.020383953	0.023534842	0.021087261	0.019560662	0.013956763	0.016472007	0.019417961	0.024054143	0.01795247	0.022510939	0.028708512	0.024417414	0.022537771	0.026773985	0.018131274	0.027106188	0.018710942	0.026410916	0.017909888	0.022870823	0.022442824	0.02886285	0.035306098	0.021723702	0.031356948	0.029557217	0.026645969
cg18282264	0.054418956	0.035718453	0.051115281	0.040717061	0.052851577	0.060923108	0.07133789	0.042869129	0.033696235	0.075419841	0.057328971	0.043114555	0.062236263	0.056033571	0.053330694	0.056374168	0.04486533	0.0470081	0.063099793	0.039982874	0.033686585	0.059592409	0.035801208	0.037740803	0.050851718	0.037870885	0.043656081	0.054033705	0.049442741	0.059482195	0.046094775	0.05657032	0.049700808	0.052821749	0.051954216	0.070201136	0.047432631	0.056856903	0.045326808	0.03494331	0.062493783	0.048509893	0.07197893	0.057473992	0.059134037	0.076060968	0.061460876	0.041717962	0.059192193
cg12502785	0.061672394	0.050945829	0.051033156	0.051822395	0.04162029	0.051393834	0.072009531	0.054687077	0.061163311	0.052904668	0.063002898	0.04653699	0.051146257	0.061651961	0.062288926	0.049947815	0.061299688	0.056818764	0.055798967	0.052734597	0.0629429	0.057241852	0.05740782	0.05119775	0.05646314	0.051607674	0.050738326	0.058492021	0.063637243	0.05403024	0.058759382	0.043414102	0.059820746	0.061181481	0.050593324	0.061734055	0.032385577	0.053905812	0.058864212	0.051333844	0.049893114	0.05959751	0.042449003	0.061896533	0.059344301	0.055504688	0.080062489	0.044274107	0.055966168
cg08466138	0.064157713	0.059498956	0.066334226	0.076491343	0.064821069	0.063274906	0.055155849	0.05563834	0.069167969	0.071781207	0.067596154	0.07185545	0.05984833	0.067912195	0.07259707	0.071366388	0.065852362	0.101846308	0.074242092	0.061587379	0.06452672	0.059830656	0.063350602	0.075409137	0.071679173	0.067798001	0.064970151	0.071045882	0.075875052	0.082628662	0.066484045	0.088414275	0.079543907	0.089019718	0.088040365	0.081730517	0.054765474	0.09435699	0.066265723	0.065292146	0.075132196	0.062679094	0.081859991	0.057189632	0.089131805	0.08993775	0.065316811	0.044554202	0.092671723
cg18490802	0.055941818	0.04769378	0.060015051	0.069611402	0.063160297	0.06216257	0.062290693	0.054540911	0.069313022	0.058871006	0.078626968	0.057685474	0.059229266	0.066365562	0.067342195	0.071760834	0.075413147	0.068142893	0.077606101	0.066922086	0.063902913	0.071041681	0.07125036	0.061194747	0.067826896	0.066231067	0.073517422	0.064191259	0.101535025	0.107788539	0.068767306	0.05565978	0.083529382	0.065941327	0.065609446	0.084814336	0.060699171	0.08453487	0.063513305	0.071425062	0.050150139	0.0686738	0.0780525	0.053412399	0.08416023	0.082662795	0.061929618	0.051116038	0.041751614
cg14761454	0.222343322	0.211559618	0.210101351	0.170380488	0.310625817	0.283617546	0.267029771	0.254455896	0.142554392	0.129003164	0.120085995	0.279042633	0.157537296	0.228958598	0.173357869	0.143447029	0.175896673	0.191487514	0.187730839	0.256984736	0.170600137	0.175868919	0.257858764	0.118565052	0.260094144	0.143214933	0.266826688	0.242117977	0.143093793	0.159322954	0.18213433	0.152526137	0.203717476	0.16239928	0.135992748	0.166259015	0.268020611	0.243623418	0.211794376	0.250627051	0.15174922	0.225569809	0.235439835	0.183051558	0.231614702	0.728585966	0.291762949	0.14202119	0.360366918
cg01991180	0.079523752	0.105074793	0.104712896	0.07167519	0.168794207	0.124838158	0.114763568	0.139365474	0.112818772	0.072434319	0.08754084	0.125416568	0.089105807	0.079650984	0.092935768	0.098510802	0.111005861	0.095900232	0.08516675	0.100281462	0.122560264	0.090769625	0.097783156	0.100906128	0.132607826	0.070134107	0.076680636	0.124032976	0.081251982	0.09598028	0.098114402	0.083817193	0.086641765	0.08955141	0.085357727	0.123364389	0.10445009	0.133296901	0.077614827	0.132135202	0.078039037	0.085687087	0.109049121	0.061374729	0.059558143	0.159982917	0.118956873	0.073325219	0.129251737
cg27453365	0.059225147	0.085007252	0.060439945	0.059813836	0.134310867	0.099193163	0.114975277	0.108281231	0.056946249	0.041347407	0.056990122	0.138809031	0.069670602	0.090562243	0.076042642	0.090084539	0.094953126	0.068217138	0.034558689	0.096468035	0.08259116	0.070335335	0.120734003	0.061241989	0.104587818	0.06753923	0.105512181	0.092936991	0.052033907	0.088023784	0.059717996	0.068729575	0.077416775	0.067955213	0.051984353	0.079970976	0.07192304	0.091784401	0.066592162	0.087185794	0.082193148	0.089771851	0.097655645	0.055521592	0.047422511	0.097581259	0.062123048	0.040381393	0.040652005
cg12106634	0.050613431	0.080220057	0.093348241	0.063878505	0.098484361	0.099538531	0.084117962	0.053513141	0.04021403	0.059485305	0.055459497	0.073062086	0.048135765	0.046092948	0.0510782	0.042434597	0.041886603	0.054243414	0.053095311	0.039885594	0.066503491	0.039978499	0.084427154	0.048508583	0.049093423	0.040589868	0.065436274	0.066760658	0.042838264	0.064020934	0.080838238	0.04266337	0.087030872	0.034928375	0.046988513	0.052136334	0.046778576	0.031865891	0.0488811	0.05665689	0.078243626	0.042970847	0.074675835	0.042198255	0.032883206	0.063402879	0.049497946	0.042055867	0.074960158
cg27599391	0.067632554	0.138098088	0.10398298	0.089136684	0.220791347	0.121805769	0.167217821	0.074154805	0.083360973	0.1013557	0.076235199	0.076234358	0.109205266	0.123824067	0.082014279	0.063457736	0.122157646	0.084336924	0.105430563	0.099457061	0.078695886	0.082634732	0.065742212	0.073343589	0.094770719	0.064920981	0.09236448	0.095295408	0.043929842	0.077301954	0.112688098	0.103449762	0.109804212	0.081446545	0.078956702	0.105244762	0.11281737	0.098188958	0.081178537	0.142627852	0.113769484	0.156441008	0.127117143	0.061606391	0.040721578	0.052681113	0.031198755	0.043181717	0.051115964
cg03569616	0.090244623	0.111194449	0.127022327	0.080119796	0.198710583	0.18680271	0.109727806	0.098982906	0.114928263	0.092854386	0.088844734	0.152109323	0.08438748	0.078892194	0.102720377	0.081689593	0.137047389	0.09457849	0.087378326	0.061589856	0.135202948	0.115115976	0.092139569	0.111873611	0.128365972	0.067440654	0.112062281	0.118311863	0.085843116	0.140636714	0.112816375	0.122979984	0.109190916	0.099397143	0.088211571	0.158916919	0.157747583	0.092316768	0.108847303	0.117672017	0.124068235	0.109457027	0.174979961	0.062575438	0.068766145	0.087113782	0.09245204	0.088077109	0.106451472
cg09808176	0.032680932	0.017668581	0.059547107	0.020165985	0.053492031	0.031865446	0.017467641	0.031001039	0.066425742	0.022932891	0.015144554	0.033999775	0.015016747	0.017622653	0.034106078	0.024106712	0.021881456	0.024938381	0.036175685	0.042915797	0.02861484	0.014466603	0.035969762	0.029674498	0.042537249	0.025917228	0.039804532	0.048650976	0.019965724	0.014134649	0.032475593	0.044652041	0.023917683	0.016389275	0.008912471	0.040342198	0.030823963	0.04425921	0.039268743	0.04154651	0.044319264	0.050710686	0.034473558	0.014188594	0.007065395	0.019168346	0.010956363	0.01509665	0.043769386
cg18042593	0.089526584	0.114810006	0.112134908	0.063898427	0.152996758	0.1207036	0.123249654	0.089478154	0.086905006	0.10128115	0.075476359	0.079186086	0.059576726	0.064113758	0.068474937	0.050238806	0.054539852	0.063525695	0.088679126	0.06030777	0.070188403	0.071549887	0.075977842	0.05195729	0.071672676	0.028562558	0.040266085	0.051232607	0.077087911	0.089478975	0.07090501	0.070305474	0.047461029	0.109988258	0.082695214	0.083935797	0.063618127	0.067661729	0.064442747	0.079747632	0.14847865	0.09709751	0.088966661	0.038724	0.045145495	0.081173478	0.049004171	0.038546655	0.097782424
cg25918541	0.06695318	0.067802574	0.063509601	0.035698253	0.113593039	0.119173013	0.117466393	0.045474381	0.065429632	0.051359633	0.041470565	0.057884656	0.014211276	0.043623262	0.059147101	0.023916811	0.047962773	0.058011515	0.023476175	0.058111315	0.047941282	0.02571214	0.067461096	0.030300103	0.043492758	0.025557945	0.059157009	0.085107976	0.038775037	0.042131048	0.054726446	0.077627648	0.05075434	0.066712392	0.018577459	0.060970743	0.051001695	0.044415386	0.047442978	0.061533248	0.053682184	0.063910255	0.066363303	0.050468904	0.027713286	0.060818597	0.030571296	0.023359971	0.08029008
cg05637308	0.074626619	0.134828773	0.070571871	0.062470917	0.080899818	0.115038688	0.052109637	0.045476425	0.064169287	0.055772806	0.040976235	0.056018572	0.041271141	0.042642968	0.050704534	0.041094754	0.044807392	0.051964832	0.067464873	0.037362688	0.036568688	0.048270387	0.037435641	0.046302685	0.054655301	0.04488375	0.067370163	0.054593787	0.030901053	0.051736048	0.066555237	0.037730294	0.070364288	0.034699217	0.056323979	0.0516855	0.055968282	0.068232148	0.056590094	0.067580958	0.038381445	0.061036688	0.060651039	0.085277117	0.109252196	0.061036373	0.065605808	0.046890191	0.113998859
cg01800843	0.07204419	0.132122393	0.066389117	0.044345544	0.148144397	0.119343641	0.151898422	0.059242405	0.059337345	0.053100229	0.042946451	0.072397712	0.0304591	0.038204279	0.047815979	0.054346334	0.045168128	0.047180965	0.036005285	0.046428887	0.041316504	0.050405398	0.045638676	0.024592	0.056759932	0.037459951	0.081779797	0.077144232	0.048929358	0.05381938	0.065011558	0.040064862	0.081886742	0.026497526	0.048382251	0.041943074	0.032322533	0.040281697	0.051636554	0.04847399	0.042981904	0.067766147	0.088683124	0.063126037	0.064234774	0.122930825	0.031607938	0.104408489	0.091781787
cg23389069	0.060137168	0.089359414	0.073828592	0.041302826	0.129936477	0.082159781	0.111225024	0.059235511	0.071069368	0.05049766	0.052220755	0.04195191	0.048641052	0.062996827	0.029537989	0.040885102	0.050957304	0.049955779	0.046355367	0.051576854	0.040145273	0.058781316	0.0551088	0.03036005	0.048305896	0.023478681	0.078740272	0.062916539	0.039182684	0.049970583	0.063931075	0.046480396	0.061453983	0.053376607	0.04606693	0.058303698	0.04595137	0.052300091	0.055181812	0.070453981	0.046128851	0.066617515	0.093565719	0.084380674	0.075901889	0.076641913	0.072731107	0.07287721	0.055798185
cg12019961	0.286980728	0.220956699	0.340728099	0.20827353	0.398866211	0.420358764	0.290884781	0.297735866	0.258754011	0.176703349	0.150586212	0.25052386	0.196385635	0.234520966	0.171540006	0.184314801	0.186687903	0.25297777	0.239770076	0.290898072	0.152904786	0.221939071	0.267951836	0.123052432	0.22196657	0.167634525	0.308124329	0.323441751	0.207435754	0.294190674	0.286185639	0.265599605	0.320779855	0.10035352	0.125932434	0.240040033	0.186373874	0.162937701	0.145206594	0.338402833	0.139347672	0.27548278	0.25883045	0.062076445	0.072677708	0.120660606	0.114227215	0.083187111	0.079559043
cg23275463	0.070401624	0.125500776	0.096228337	0.072387055	0.132552115	0.144900339	0.153490692	0.103636578	0.092029495	0.064690407	0.080266189	0.076928936	0.070746319	0.115208076	0.08738671	0.078514959	0.089273393	0.073224911	0.094016445	0.050532236	0.047027631	0.069363128	0.092645281	0.062104415	0.029450402	0.059521998	0.120644906	0.032374933	0.055920733	0.039382554	0.110599058	0.093265247	0.086450824	0.06244241	0.048800493	0.08790532	0.115868716	0.08619351	0.048524056	0.122957668	0.063044604	0.168920956	0.114631423	0.091579714	0.067969285	0.129170228	0.086038777	0.106323645	0.09005292
cg17114932	0.155500785	0.134160613	0.156585408	0.058350638	0.234428299	0.30032415	0.190037697	0.094334904	0.089652074	0.105124841	0.07317467	0.141082097	0.105443065	0.122484988	0.101105513	0.072530227	0.104194891	0.068994898	0.102923144	0.125719687	0.06126457	0.085281711	0.150551838	0.063827505	0.210882082	0.057893219	0.087876358	0.132447336	0.080500545	0.140711092	0.103137626	0.079089592	0.102867559	0.084980602	0.045125427	0.129428945	0.100724113	0.089607411	0.078497453	0.126963137	0.067645307	0.097449616	0.151057962	0.047436503	0.048527073	0.051316669	0.045953066	0.069808507	0.08596724
cg22678707	0.085507753	0.137214509	0.10322411	0.072159854	0.134423287	0.122434058	0.142290855	0.049092816	0.095860287	0.036054963	0.054122961	0.066480486	0.075717301	0.077286824	0.070656225	0.038490266	0.094179225	0.090674589	0.066377638	0.081654801	0.056538359	0.053858493	0.0623435	0.064015685	0.081509034	0.025477224	0.072820697	0.112476119	0.038331845	0.079252017	0.094630042	0.079417647	0.089933903	0.101221715	0.064505684	0.066136628	0.107383664	0.060529408	0.03726122	0.07598051	0.071941256	0.093881953	0.072969046	0.067513677	0.044563053	0.058823907	0.055503779	0.087417449	0.106320906
cg04826772	0.050562404	0.056860817	0.054360978	0.060079624	0.071607312	0.060403659	0.058743415	0.051615738	0.065141371	0.061151997	0.062845653	0.072657613	0.054042738	0.072143573	0.058923968	0.080868964	0.06575658	0.096821674	0.072844	0.079160284	0.063694568	0.056645046	0.06287178	0.053999603	0.05820864	0.045018938	0.074332017	0.066249108	0.060456395	0.090747342	0.084674436	0.053926882	0.063661823	0.060173273	0.052917685	0.062016792	0.049614939	0.067841869	0.058669222	0.053499676	0.053147844	0.050960042	0.064347632	0.088959303	0.059071031	0.088907135	0.079559666	0.047145331	0.038089329
cg25740661	0.047796992	0.047304683	0.0501622	0.066373881	0.066702355	0.053603177	0.05862136	0.053861608	0.052294603	0.052123512	0.045386427	0.065696408	0.045339785	0.061164657	0.057245303	0.054378495	0.056544076	0.043359734	0.052211837	0.055236172	0.059391333	0.076754117	0.050218439	0.06194794	0.050332141	0.071993154	0.056785763	0.057125318	0.051877823	0.052507477	0.051314615	0.047801947	0.054190501	0.059203884	0.050723905	0.059620281	0.051761536	0.068413432	0.05213873	0.066245529	0.063972943	0.054926522	0.052213631	0.08702571	0.074292279	0.056917566	0.129146467	0.066639967	0.073240085
cg24568245	0.091255574	0.116956095	0.083723667	0.115954182	0.111531807	0.116413705	0.138463861	0.148511532	0.13407496	0.106239416	0.044594193	0.101069117	0.014892507	0.084888007	0.110025066	0.070377922	0.040372804	0.118191893	0.102684882	0.03939785	0.059512702	0.083685636	0.144916262	0.063772132	0.113972989	0.072845312	0.129390639	0.095671199	0.083263504	0.073817377	0.07570387	0.091481146	0.121611132	0.061106028	0.01986734	0.109874274	0.108002358	0.057703083	0.056934458	0.135441608	0.114996136	0.127679822	0.125605911	0.115198654	0.060600622	0.162158429	0.07761335	0.075715614	0.227198872
cg02105423	0.057600575	0.067650067	0.068239805	0.083700111	0.081351829	0.070816038	0.067284799	0.066525793	0.06252204	0.069834985	0.08351937	0.075952255	0.064462061	0.080167821	0.083430062	0.090392574	0.077598316	0.089806851	0.074558446	0.083369306	0.06805218	0.06239836	0.075080954	0.077599247	0.100990939	0.066092167	0.070994932	0.077561782	0.06745935	0.081186583	0.072697794	0.08924663	0.081943322	0.086952403	0.059659202	0.09018361	0.052880495	0.088022548	0.072965591	0.075428575	0.06163514	0.073589793	0.073817418	0.128289162	0.082902394	0.076143493	0.112785332	0.081099789	0.090803845
cg19288979	0.077383779	0.073337919	0.073553159	0.092976127	0.075336283	0.079253181	0.076331409	0.088857967	0.087211962	0.092721832	0.096880789	0.087979742	0.081698466	0.103710732	0.086460978	0.093016625	0.099758741	0.094873067	0.101937753	0.088665359	0.088926592	0.099108469	0.101845805	0.077720458	0.087003312	0.078155241	0.081998357	0.080172395	0.087486737	0.092492642	0.090875483	0.100082828	0.090140862	0.096088419	0.078062852	0.094924484	0.076672661	0.108611252	0.091260949	0.095568788	0.098298654	0.085170233	0.098068807	0.059113984	0.082851713	0.065930241	0.096338947	0.060233174	0.040897921
cg10610482	0.16159217	0.107751671	0.201946635	0.061434379	0.109900909	0.168657085	0.121473733	0.145404757	0.090752953	0.07426564	0.084163624	0.077814171	0.074278495	0.085570492	0.059112892	0.057778428	0.10365956	0.065689891	0.078142035	0.04061265	0.075372279	0.047095038	0.042514268	0.070249474	0.115268522	0.072622565	0.095443009	0.063840825	0.057610702	0.062225866	0.108057736	0.085694357	0.099858713	0.044169396	0.063693865	0.103339604	0.089707443	0.078943667	0.055160261	0.068732486	0.100769371	0.14081686	0.106275662	0.023318919	0.029406582	0.015916662	0.049887813	0.056024165	0.100521186
cg12848864	0.238648847	0.420201699	0.31720419	0.172085439	0.429369355	0.407672537	0.308740745	0.326335228	0.191341308	0.170369264	0.127234811	0.173974326	0.196794887	0.172569153	0.136606053	0.136202395	0.230801288	0.222787326	0.19654715	0.131211218	0.155894123	0.182046447	0.180847484	0.17277033	0.191314672	0.12151926	0.172012671	0.193723535	0.160542817	0.196192242	0.205696394	0.183847998	0.33257623	0.21977967	0.144534931	0.196463126	0.19949197	0.194012062	0.152786771	0.278487093	0.158278686	0.257732415	0.271064544	0.05580725	0.057516857	0.175011218	0.103247963	0.092716211	0.154331426
cg03165700	0.163229905	0.216790007	0.294716356	0.094478743	0.285022136	0.341792592	0.221763499	0.210680915	0.156331968	0.093654984	0.093447817	0.137767587	0.1213721	0.150165825	0.098303664	0.139510993	0.121080224	0.108198082	0.12231136	0.111428854	0.130709078	0.142714657	0.157975966	0.131631973	0.133263345	0.108138584	0.166839993	0.17936184	0.123216512	0.112334354	0.148217706	0.141434618	0.145560393	0.128886478	0.093949666	0.124984115	0.181623342	0.102512528	0.098437969	0.129822978	0.10958751	0.188644434	0.139944737	0.093846325	0.083904741	0.071409911	0.102319656	0.119590917	0.102891807
cg15504467	0.103659791	0.044198798	0.108417327	0.064350393	0.172119875	0.1568177	0.104369365	0.081293291	0.075846996	0.058034768	0.062945932	0.076099248	0.058377017	0.064464818	0.059584501	0.094228897	0.069752104	0.038285324	0.079009461	0.060382986	0.066527996	0.078175974	0.054319857	0.041843481	0.111815152	0.067212022	0.060332131	0.093225433	0.056614798	0.043682213	0.06389061	0.06586514	0.099244547	0.026867916	0.052116466	0.077905841	0.066678445	0.079486749	0.108387038	0.068110122	0.070590208	0.112873092	0.118220771	0.083332	0.059095731	0.047796187	0.055773289	0.068068471	0.107226228
cg05033322	0.092987958	0.087053087	0.068901032	0.036481988	0.074368944	0.103747569	0.100374167	0.153265998	0.051245663	0.046302055	0.044970712	0.047559991	0.041172857	0.020575825	0.053628918	0.057027184	0.059519041	0.052737907	0.051963532	0.054293051	0.026783631	0.056572821	0.069735836	0.054595027	0.073433669	0.06381134	0.081279767	0.065138793	0.079665831	0.061462649	0.088921165	0.059224986	0.096980539	0.066988066	0.036141336	0.081671371	0.057166588	0.045858298	0.032540656	0.044058609	0.037837083	0.068319709	0.098596005	0.133670512	0.045476786	0.151066806	0.051359396	0.094609896	0.105952963
cg16693212	0.110300027	0.133269487	0.119807099	0.055444328	0.170553366	0.212754338	0.15087862	0.117241104	0.085437526	0.081571724	0.079344122	0.082551209	0.094175825	0.065058823	0.073706901	0.070968105	0.09791125	0.086614439	0.120273736	0.07008809	0.082306989	0.078151908	0.115692843	0.072680606	0.123139996	0.055827348	0.09856035	0.10422792	0.056282659	0.06093902	0.108562332	0.079453673	0.153718365	0.087719687	0.079368713	0.091188263	0.09974445	0.072819769	0.06196731	0.125917564	0.066144422	0.109561769	0.133625208	0.058506468	0.058076529	0.128070126	0.069267238	0.116710204	0.111475713
cg20342375	0.054962245	0.067685989	0.07332823	0.053716955	0.081597694	0.102143246	0.062207415	0.045666021	0.045283488	0.048139058	0.065992601	0.037286882	0.039148385	0.050706075	0.062125793	0.034257414	0.05137222	0.030956807	0.040225644	0.036152219	0.024692114	0.043775251	0.058146236	0.039645693	0.038674484	0.042326512	0.05562893	0.0522603	0.051272283	0.053603466	0.040333082	0.051578045	0.066629378	0.049477113	0.039800838	0.046500718	0.044041492	0.040264746	0.044840186	0.0632936	0.060612062	0.056708484	0.052480919	0.063632881	0.056737623	0.063771134	0.044772996	0.070336044	0.065684502
cg15370815	0.0992638	0.114942128	0.100284041	0.101913928	0.092974021	0.100503431	0.079442681	0.089823585	0.097571082	0.097371598	0.093369491	0.121879523	0.082975695	0.107862164	0.095675192	0.110363134	0.101854529	0.108515128	0.120140813	0.09597337	0.095273749	0.110664136	0.094036455	0.109327323	0.102729189	0.087848306	0.090543174	0.110016147	0.093228423	0.110309872	0.095890673	0.093757989	0.10501643	0.093398025	0.092740052	0.103650881	0.083459577	0.104043645	0.084243637	0.088768483	0.090451957	0.107424823	0.100382532	0.140644043	0.125501152	0.125572864	0.120787674	0.099861339	0.102520753
cg16788234	0.07529198	0.049180853	0.06589429	0.069838323	0.054766613	0.070338724	0.055665669	0.061350378	0.057115313	0.069932289	0.05321189	0.065759988	0.079514077	0.090243974	0.069560404	0.070660259	0.078891196	0.073117052	0.072640249	0.06398587	0.06558784	0.073909369	0.069222257	0.080058741	0.066058207	0.075326003	0.06699992	0.056910711	0.050416441	0.071149772	0.068311937	0.076270399	0.068719988	0.066704999	0.066407674	0.083481455	0.058734983	0.07381025	0.05134617	0.064737915	0.069635453	0.06802504	0.059600482	0.056515983	0.079918159	0.068806751	0.083547098	0.082101484	0.050406429
cg22837512	0.063896503	0.040115321	0.033421965	0.009414901	0.037598657	0.04068569	0.041861997	0.041106684	0.015705527	0.014265697	0.023219559	0.019974386	0.036047961	0.02582743	0.031328279	0.005037475	0.029366365	0.028705942	0.036591458	0.022409635	0.043870649	0.027703034	0.02405956	0.034577969	0.032342553	0.029302697	0.01828014	0.033819471	0.023422257	0.01955467	0.024171298	0.015754249	0.031324049	0.007034322	0.019405366	0.025663826	0.027481445	0.022080726	0.020472683	0.020081513	0.016921737	0.021471369	0.01746294	0.223790872	0.10070146	0.129119052	0.097867767	0.082796691	0.108144649
cg24030675	0.01810633	0.025610263	0.040797496	0.029921355	0.055448048	0.052223136	0.044796785	0.024230126	0.038017211	0.047403133	0.033126306	0.032752081	0.026953757	0.018301837	0.028468175	0.029949014	0.045605285	0.036359316	0.013236868	0.036300621	0.021431989	0.020665749	0.040120464	0.025037891	0.042828365	0.034338771	0.030886626	0.031249322	0.033367302	0.046619784	0.024931293	0.029195202	0.048657913	0.029971358	0.020932459	0.044893349	0.023709968	0.030017667	0.026959458	0.027947766	0.024209499	0.038890045	0.026600558	0.07694188	0.069996505	0.100302155	0.075556918	0.074303253	0.090391772
cg06053805	0.006605334	0.007581324	0.016463238	0.011437609	0.017952176	0.021196033	0.0162764	0.022083461	0.013497234	0.010031609	0.008565152	0.014015786	0.011364272	0.006936657	0.011968251	0.008514546	0.007609698	0.011896684	0.010571361	0.009478166	0.012691909	0.009121141	0.014167027	0.008438371	0.014678817	0.002156295	0.016148652	0.01487505	0.018538402	0.011221932	0.010565611	0.014300397	0.018127304	0.005580192	0.004987823	0.018628947	0.013305159	0.00618846	0.00933335	0.01220341	0.013855853	0.012464506	0.014050057	0.05482403	0.015230636	0.037589641	0.021427565	0.023912422	0.064712318
cg06750635	0.010211799	0.012904438	0.018093892	0.003305137	0.028629617	0.0209853	0.029770448	0.013944389	0.014287698	0.025946528	0.018653483	0.025362732	0.013585574	0.022878206	0.016230199	0.011299519	0.019967924	0.014432488	0.01766882	0.019197199	0.016721858	0.008720303	0.023647072	0.013011689	0.021712057	0.013252734	0.021295969	0.026681956	0.015006023	0.022324734	0.00978749	0.023160749	0.032186415	0.015656305	0.019112802	0.024273316	0.011745885	0.01594422	0.006103335	0.019483286	0.008800618	0.011820194	0.020128808	0.052721485	0.032617195	0.066700577	0.031722774	0.036582168	0.108241884
cg25400013	0.015627064	0.015119183	0.021944744	0.003225588	0.025742365	0.015401349	0.027290333	0.02085194	0.008332295	0.017235553	0.005286507	0.019869298	0.013507925	0.015334328	0.017833033	0.005148985	0.009724901	0.013377643	0.010772961	0.00665118	0.012619339	0.01202566	0.017771759	0.009688523	0.015426421	0.01250548	0.003563646	0.016169374	0.009185335	0.019103879	0.018208156	0.006071573	0.01509835	0.014242662	0.006260188	0.012748288	0.019599699	0.015645343	0.005537193	0.01499488	0.017848884	0.012729938	0.017311758	0.028139375	0.010621295	0.020905436	0.034729655	0.031040739	0.055703732
cg18391757	0.097039919	0.081078902	0.078282893	0.065512371	0.106600354	0.13638346	0.114921615	0.074670214	0.04954957	0.067703336	0.054851465	0.062201489	0.078123938	0.064092664	0.056003264	0.067947249	0.061955556	0.063183138	0.066684435	0.056206566	0.063013069	0.068994483	0.067912698	0.065553244	0.067896308	0.047592708	0.062625106	0.052575145	0.060577418	0.04999631	0.073537561	0.066565568	0.081892851	0.048287309	0.052100125	0.075411424	0.033598465	0.077263742	0.079969458	0.061303589	0.057851879	0.077721869	0.05543627	0.138644407	0.161832625	0.121067172	0.134076165	0.139618	0.137294083
cg18457775	0.029032171	0.035689547	0.040953151	0.047745886	0.035825268	0.043372101	0.076207004	0.025734371	0.036864943	0.037821997	0.01903341	0.039853421	0.028784033	0.056764591	0.02644948	0.023075764	0.022777865	0.015818826	0.043653738	0.03008977	0.028922079	0.034187784	0.018926741	0.021741526	0.030780382	0.02452644	0.023826304	0.03355174	0.020510556	0.031218191	0.03083666	0.031140802	0.032342224	0.03361416	0.02343903	0.027312075	0.019357062	0.026773577	0.025708232	0.030111075	0.021795355	0.037774204	0.044076736	0.089609561	0.084511666	0.069524385	0.044793107	0.060592125	0.069859687
cg04709886	0.034184844	0.026671133	0.018252074	0.032561412	0.044441582	0.040909388	0.056620777	0.039984434	0.03308697	0.036754629	0.027407174	0.025813723	0.030431042	0.029535005	0.044809914	0.026003018	0.034045702	0.036982129	0.025108579	0.030947585	0.036282325	0.027425251	0.030907017	0.036090949	0.035636382	0.025501593	0.024150066	0.039908822	0.037260976	0.030746195	0.032294468	0.021160195	0.038424722	0.020671397	0.020010947	0.031935087	0.033608028	0.012966781	0.019193263	0.031540992	0.035814235	0.032996137	0.044504218	0.053396582	0.064598152	0.090665909	0.027109301	0.085623239	0.099351309
cg01756564	0.117118758	0.147344587	0.094256381	0.095978849	0.177098028	0.242284141	0.241959387	0.078255071	0.07822775	0.070809988	0.054444302	0.106890755	0.085039556	0.078335672	0.056451224	0.06503905	0.086373687	0.058440884	0.058937862	0.068028386	0.066400859	0.06879881	0.056214517	0.064061761	0.094001261	0.062829252	0.08209988	0.132842474	0.079350828	0.078865051	0.062083979	0.091849913	0.124530317	0.098081152	0.051833509	0.102652147	0.06459347	0.06796117	0.059938817	0.127803323	0.073137312	0.068323811	0.129924832	0.101883585	0.040182414	0.100358271	0.097858204	0.085758104	0.12363261
cg22477592	0.073117864	0.095890136	0.07215352	0.061888707	0.085305866	0.057527007	0.097057117	0.064224032	0.068480751	0.063881154	0.080374396	0.049843026	0.067654564	0.084079302	0.063113976	0.010575228	0.060860949	0.057411491	0.054621155	0.045743708	0.060949478	0.067322833	0.04702866	0.04761772	0.065924414	0.044536126	0.056351874	0.068495288	0.05679374	0.053346558	0.068452306	0.071034167	0.092074521	0.06198422	0.058906709	0.052085673	0.066735946	0.06347077	0.06379595	0.078600215	0.061059216	0.061596751	0.073984312	0.043759608	0.051701923	0.040368568	0.040887378	0.06019539	0.043269278
cg05231509	0.046297703	0.036455254	0.05651658	0.045886913	0.046196557	0.059176789	0.042680938	0.053332493	0.059071455	0.043271988	0.037873994	0.055028156	0.034889688	0.0530393	0.050601186	0.043139545	0.060862437	0.046067251	0.053414224	0.049003078	0.063695283	0.056348827	0.053971031	0.052886	0.05282838	0.036714597	0.039257228	0.041158793	0.042747131	0.045211518	0.071058404	0.035844449	0.058919803	0.039842092	0.038899818	0.051616608	0.038735505	0.045041894	0.047749129	0.076890246	0.046950351	0.036903058	0.049819524	0.055920654	0.072098502	0.111267992	0.102789784	0.095783974	0.049314753
cg24027342	0.714020585	0.708698217	0.691707508	0.702706045	0.788692847	0.742313474	0.746446571	0.67957059	0.715560549	0.684138901	0.723810554	0.710777892	0.681968646	0.722749788	0.706727421	0.722074306	0.700196235	0.723496551	0.707700051	0.718526464	0.67403678	0.719841438	0.719694955	0.669516335	0.727535421	0.693978666	0.708358023	0.749135806	0.690357877	0.714245538	0.68123391	0.72529472	0.709477801	0.716883494	0.703226204	0.717122079	0.752119995	0.723520057	0.702093606	0.720597432	0.695501664	0.719042469	0.714311607	0.475430137	0.497420325	0.481172774	0.520277478	0.476787021	0.457677585
cg03092399	0.887362062	0.906721583	0.894946689	0.901140289	0.871677046	0.885097593	0.889131739	0.869798681	0.936653566	0.894099094	0.899413883	0.910458617	0.9196145	0.862280536	0.907388756	0.890737795	0.866984044	0.905513551	0.894317001	0.909870307	0.899185653	0.888685179	0.922056097	0.873995017	0.858664932	0.915687659	0.915381257	0.866450463	0.878027172	0.880043626	0.86626037	0.84779629	0.908273437	0.880786711	0.870486254	0.88196151	0.895166653	0.916979182	0.906259062	0.910812804	0.910532126	0.909343749	0.900759424	0.849397715	0.811502654	0.841669463	0.884661468	0.805959506	0.664438781
cg19643901	0.878790879	0.884577325	0.899885033	0.908526072	0.840269026	0.871401739	0.834304316	0.87317593	0.911947645	0.887367645	0.890956873	0.895081114	0.884497261	0.886414358	0.886784548	0.94712579	0.879490804	0.930006961	0.876879282	0.909050626	0.874038447	0.896230121	0.917984617	0.888448576	0.881400543	0.916640612	0.871505252	0.926112585	0.893192589	0.874238608	0.902452431	0.895929594	0.895382675	0.908610241	0.942072697	0.864601263	0.89300286	0.94248889	0.906362387	0.880717117	0.873782295	0.896751652	0.91542787	0.727761983	0.866152752	0.82374423	0.778309264	0.790325374	0.747298382
cg19892525	0.541505848	0.616478739	0.557976276	0.597388133	0.424207591	0.511832347	0.430019892	0.64091935	0.64120417	0.589050303	0.579845001	0.586275988	0.569894378	0.638879631	0.661279844	0.663980126	0.523786739	0.661199208	0.619032923	0.569852104	0.673206427	0.71215535	0.626758339	0.651590218	0.552848948	0.644306561	0.588779645	0.644005789	0.579665456	0.559729707	0.512149974	0.526654708	0.531790935	0.553333972	0.634605566	0.583632046	0.624132127	0.679531159	0.563803749	0.564924079	0.63564835	0.484740996	0.620934961	0.730289855	0.641430725	0.491773387	0.580624949	0.746393971	0.591482451
cg12139707	0.947492502	0.911446412	0.935515473	0.921542468	0.875913704	0.8431618	0.903631843	0.938844648	0.915700309	0.910324196	0.925066227	0.912869375	0.927362027	0.942825336	0.932513065	0.93685861	0.915670282	0.93216207	0.926114402	0.948123316	0.92133231	0.929982351	0.926572101	0.910216033	0.896784307	0.913766423	0.936828933	0.922050763	0.92450951	0.918807016	0.92361173	0.934506002	0.921043485	0.886745137	0.91836429	0.919666752	0.922197947	0.925585459	0.947897365	0.926777418	0.926844709	0.907221636	0.933498378	0.707003418	0.752077582	0.851864252	0.844607608	0.613119016	0.702040731
cg05471373	0.949382177	0.910199065	0.930048399	0.950586337	0.923475326	0.928261788	0.931479063	0.903257653	0.919345034	0.95802386	0.940732901	0.931843568	0.954707699	0.948457406	0.952179569	0.950951754	0.930205199	0.976662555	0.96390883	0.966689605	0.915706022	0.965519045	0.942944866	0.946082533	0.93351221	0.947304592	0.947487009	0.945388064	0.958164708	0.937042423	0.958057964	0.948177835	0.954305329	0.937504788	0.94770548	0.931371588	0.928704792	0.944991378	0.933156874	0.950461348	0.938742715	0.934045275	0.954402666	0.866692152	0.933465122	0.894304962	0.903098286	0.755277558	0.806506883
cg27627854	0.91096536	0.823266711	0.857869289	0.900888287	0.818607154	0.823676496	0.813091411	0.857649518	0.896943589	0.91883605	0.92772536	0.871997393	0.914777708	0.941511289	0.901628929	0.923783408	0.828776609	0.911974685	0.912912466	0.96255218	0.903538278	0.953630801	0.922290354	0.900000438	0.876330574	0.943032492	0.839889713	0.887607866	0.927450867	0.94266739	0.874044387	0.953398384	0.875133766	0.87391773	0.939178137	0.892385055	0.826866947	0.875019608	0.933569673	0.864056989	0.917169521	0.862846339	0.837312681	0.933384752	0.931572922	0.879944899	0.924229673	0.9012734	0.844107375
cg04770025	0.920593802	0.839996026	0.881333641	0.973119843	0.935485306	0.866738518	0.862918833	0.914609174	0.869599405	0.95998351	0.934382718	0.890759751	0.978520746	0.941292396	0.953891307	0.949358489	0.863533251	0.931223886	0.936039453	0.927604057	0.902043744	0.944110114	0.937580264	0.925449195	0.897008407	0.960440222	0.932417102	0.907536481	0.996193014	0.901704016	0.909495337	0.932225581	0.906556123	0.942164183	0.94759834	0.91985706	0.92768764	0.946205907	0.95846285	0.917875232	0.942116733	0.809728094	0.904346362	0.858079946	0.891968156	0.902041224	0.861098502	0.940746574	0.883013483
cg02511767	0.925653887	0.954576801	0.940112691	0.928409878	0.873604139	0.885827766	0.846432517	0.943880379	0.898884274	0.933022785	0.93535491	0.927725934	0.930760316	0.938375739	0.940123737	0.952311682	0.9622655	0.926751221	0.901206678	0.958543009	0.916818887	0.977212023	0.918545101	0.950543084	0.873794118	0.94496838	0.918630024	0.923585622	0.964059326	0.943387491	0.93286073	0.929071601	0.920453959	0.902454866	0.944204912	0.90821459	0.931950754	0.918165251	0.936821797	0.932474973	0.941280322	0.908484976	0.91971994	0.940627781	0.923958939	0.945466128	0.959025712	0.934725578	0.947085745
cg17066171	0.874814424	0.890570756	0.964043057	0.9330076	0.895167162	0.913931495	0.881048696	0.948255567	0.909705023	0.931462108	0.923090631	0.922784105	0.928807927	0.894266176	0.954316202	0.937990736	0.913655821	0.928310423	0.905321874	0.899572223	0.917084019	0.952480964	0.94150844	0.948722018	0.918067152	0.958201606	0.920036636	0.921944018	0.942815086	0.940506293	0.938134315	0.939593596	0.895959122	0.931930304	0.915028433	0.908042635	0.900652971	0.909212812	0.93682677	0.919312101	0.901677939	0.915739501	0.927300477	0.888019105	0.853583725	0.460851839	0.847089788	0.807676249	0.640228782
cg18474718	0.824793353	0.812015196	0.836469512	0.765649032	0.882062043	0.835506403	0.829262386	0.811534754	0.7915884	0.784445699	0.769144021	0.808083573	0.76129561	0.759877482	0.748057204	0.78703334	0.750910832	0.763053606	0.794087273	0.770446574	0.739551355	0.784732837	0.772783011	0.746950415	0.791801207	0.775805927	0.768745341	0.772405708	0.752437846	0.738081451	0.775087118	0.754059648	0.767744675	0.7634115	0.796465171	0.789867928	0.806170047	0.772094486	0.788094696	0.79514779	0.785477382	0.739632288	0.789825565	0.559487505	0.607412556	0.653103053	0.632656644	0.641274062	0.642447214
cg08954307	0.911803502	0.895476731	0.925869802	0.94347529	0.895243478	0.932001272	0.920058983	0.923647411	0.907343636	0.948450891	0.920173285	0.924274458	0.941974465	0.92233668	0.935257678	0.952078241	0.918655713	0.934535439	0.929536533	0.916365383	0.919692437	0.949078739	0.953057712	0.918643758	0.910942724	0.943402403	0.914062551	0.909171191	0.949302018	0.942974891	0.935825692	0.953916017	0.930185643	0.954751782	0.936636321	0.931062931	0.93113981	0.922514702	0.93052274	0.926230475	0.950008836	0.932417143	0.924556113	0.83940162	0.861745187	0.865149777	0.873305112	0.874232579	0.913438348
cg15535686	0.926658355	0.941068031	0.897628342	0.958321312	0.94455194	0.965494032	0.935346435	0.952326672	0.958137006	0.958338297	0.97175083	0.944400648	0.954175792	0.956706561	0.96040825	0.952073947	0.954481528	0.965242131	0.953064859	0.961571545	0.954211652	0.942753134	0.957683487	0.959763701	0.942248	0.939870722	0.950475167	0.941759418	0.951231789	0.95965146	0.9549067	0.980486495	0.950888175	0.959128473	0.95780387	0.947299713	0.93589395	0.953533061	0.937524679	0.954633356	0.96307798	0.95757107	0.965799705	0.884110635	0.938112417	0.902993326	0.943565919	0.941009891	0.943587049
cg21681962	0.898175805	0.806108447	0.848907027	0.947089624	0.740236964	0.831944392	0.843663145	0.902198691	0.900398523	0.918393088	0.909058159	0.877390785	0.898918083	0.914102874	0.901963443	0.920533255	0.887888227	0.94076249	0.894004387	0.959228603	0.915470485	0.927890605	0.911243612	0.922735429	0.903605888	0.933970327	0.883189738	0.905375327	0.91384775	0.895384148	0.888489975	0.892123807	0.895665705	0.919628198	0.925699373	0.929927151	0.885863245	0.951292143	0.924437503	0.890212515	0.908095007	0.862560654	0.895685484	0.768271673	0.866954813	0.767828451	0.843790412	0.841516858	0.784766859
cg12836863	0.660631296	0.785626475	0.380752027	0.689722231	0.747396741	0.668260655	0.647125847	0.651009073	0.484615661	0.558378163	0.52354138	0.595830654	0.572144983	0.556392447	0.544629284	0.568051292	0.603184568	0.598021009	0.381247341	0.677686857	0.58386444	0.574469104	0.573874572	0.608052581	0.644607524	0.405154144	0.693941907	0.635943556	0.596255038	0.46533007	0.672234077	0.763791143	0.550558421	0.581887716	0.645514034	0.654198102	0.731426345	0.443251727	0.447942654	0.615320199	0.573292402	0.547388033	0.614668604	0.751875879	0.501110946	0.913288796	0.744980088	0.386976323	0.924537229
cg26458617	0.216660454	0.266929228	0.182155896	0.119328765	0.490648764	0.290745517	0.346309742	0.247984045	0.239136904	0.163118159	0.13059586	0.235090626	0.168996762	0.230820575	0.175645253	0.167510408	0.258407488	0.158361709	0.082517011	0.253598599	0.19810544	0.176127088	0.298076813	0.1614215	0.269131865	0.091277763	0.195933535	0.363312247	0.15395295	0.170763367	0.298312938	0.174900916	0.205286485	0.139911996	0.152033876	0.225449345	0.24914328	0.169980422	0.212867133	0.202849996	0.227546322	0.168274163	0.248117492	0.201754647	0.232876622	0.734543647	0.435553078	0.198244397	0.605777925
cg08193369	0.059049071	0.058928253	0.065222268	0.042498719	0.090740506	0.060809803	0.113263103	0.042927855	0.045985135	0.051935616	0.049449328	0.046329543	0.04474592	0.055158061	0.050928336	0.031202969	0.051082884	0.034293522	0.034227727	0.05851796	0.065777631	0.044416834	0.03640844	0.026477467	0.040515784	0.031344799	0.053241057	0.058794551	0.043725915	0.039123065	0.047086635	0.039766424	0.053123266	0.030570051	0.027573946	0.040207009	0.04449077	0.052667189	0.037362471	0.055856447	0.053628113	0.052481413	0.055856809	0.114316388	0.057510316	0.095293098	0.041902875	0.065330285	0.090462853
cg25753010	0.071307335	0.046640945	0.080064957	0.037023884	0.102707863	0.056635945	0.070897967	0.051253694	0.06774002	0.059564842	0.060999469	0.062566469	0.055817869	0.078281194	0.08024426	0.066835019	0.070256917	0.066727406	0.066779126	0.041525894	0.066335433	0.153723734	0.073947126	0.057523881	0.080477433	0.056198109	0.090048413	0.056412556	0.051749538	0.111351067	0.089394244	0.077719728	0.123208358	0.058988531	0.032210358	0.087075366	0.054772761	0.054449664	0.092554122	0.066919882	0.062918441	0.056528168	0.046460029	0.104949609	0.112825689	0.277141632	0.086672318	0.134991831	0.099032191
cg19634711	0.053165059	0.022500524	0.034897594	0.033563945	0.051875659	0.078532171	0.05864808	0.033013402	0.035859834	0.024755102	0.040353307	0.049011599	0.021486822	0.021719546	0.036250236	0.018448304	0.031018934	0.035560949	0.037703414	0.036451467	0.026851602	0.029799601	0.03109728	0.026459018	0.034970385	0.034331657	0.032897739	0.046281968	0.027237622	0.039275379	0.042580289	0.024469695	0.053439547	0.035916735	0.030380791	0.052447207	0.03236917	0.037985768	0.024250378	0.027755519	0.047433526	0.041833201	0.063232282	0.04398404	0.045805021	0.062342909	0.027568395	0.034645614	0.03807277
cg09698981	0.068128217	0.058156482	0.064467616	0.103959247	0.091061757	0.0989856	0.069448412	0.078141559	0.074266758	0.0824267	0.086192891	0.095311147	0.0745997	0.086627975	0.0803966	0.087906792	0.10640061	0.120205546	0.099253911	0.092350085	0.073569173	0.085819229	0.068285241	0.072235552	0.085837482	0.070609967	0.107602688	0.090880231	0.076777277	0.106592101	0.084284658	0.09771109	0.103995375	0.07867035	0.072677332	0.096127769	0.050256484	0.107149294	0.076118797	0.097673086	0.068223772	0.09900336	0.109387895	0.059941673	0.056469873	0.067433675	0.12643622	0.060664031	0.046465544
cg05153735	0.0562648	0.074697491	0.050540166	0.055634577	0.054437029	0.091609324	0.080570229	0.063402457	0.068968756	0.057629692	0.054219639	0.061679491	0.072686642	0.060295904	0.067665258	0.054933707	0.065528232	0.053785043	0.06721436	0.064079194	0.031928626	0.060108413	0.081600532	0.052988035	0.108213467	0.037337759	0.063656664	0.082300398	0.052632326	0.066823844	0.066082124	0.045888619	0.066546594	0.054655299	0.060766411	0.06373522	0.056961929	0.05302481	0.056592898	0.064793591	0.046507183	0.0631654	0.06594467	0.093732215	0.072074536	0.076623343	0.037227828	0.050726995	0.093914191
cg00031759	0.07117335	0.066526816	0.057282975	0.061412133	0.060971723	0.060375459	0.069105957	0.051815251	0.062340027	0.047185305	0.044676951	0.058849147	0.042046962	0.064040087	0.048945396	0.068329492	0.063309505	0.064349049	0.056017705	0.055945929	0.058823139	0.070404292	0.053131453	0.057294096	0.06080016	0.062315717	0.05694396	0.053385512	0.049025404	0.0805981	0.039740331	0.047277819	0.064036337	0.059898731	0.054351542	0.070449198	0.052870471	0.065618107	0.049499227	0.058178161	0.05566597	0.073099963	0.05350164	0.091309701	0.088724456	0.072880163	0.069750054	0.050121089	0.064190969
cg20073910	0.062494316	0.089208944	0.104120931	0.063560042	0.077807853	0.083758289	0.080677407	0.082595169	0.052514538	0.053212137	0.062939449	0.066605009	0.071146657	0.080361507	0.063936811	0.077171278	0.099940373	0.068728433	0.062757395	0.075836555	0.074080616	0.052040283	0.080323505	0.070944815	0.081166167	0.086395225	0.075308645	0.073204265	0.057859196	0.085686479	0.071260127	0.07168187	0.096299503	0.078927392	0.0726249	0.06838903	0.065564744	0.051411694	0.065629399	0.069945186	0.074106981	0.067582737	0.071528659	0.089795235	0.09633976	0.09122928	0.082242204	0.06631424	0.151229215
cg27253386	0.066035429	0.063115407	0.058152356	0.064566503	0.06627155	0.056517187	0.061414222	0.063771967	0.052246319	0.071642586	0.056738003	0.077755084	0.048278334	0.053507776	0.060149572	0.061233163	0.057618887	0.055932739	0.069321406	0.055149034	0.053460314	0.062980416	0.07510045	0.060504244	0.060076667	0.051743973	0.071079186	0.07099107	0.067074896	0.065339754	0.060932155	0.052664982	0.067234645	0.063565569	0.047548215	0.062883448	0.056411963	0.052131152	0.05507009	0.048398486	0.052587659	0.055204636	0.078751813	0.095354082	0.066746018	0.073724826	0.064095707	0.074006158	0.081681764
cg08157964	0.032487427	0.024278187	0.021147874	0.016177843	0.039851102	0.040546135	0.040935283	0.023935109	0.02958931	0.024567257	0.020777705	0.027543872	0.024033765	0.013571222	0.023259145	0.01989805	0.030782648	0.021728942	0.022013414	0.0167286	0.023950258	0.018918832	0.02587759	0.013183751	0.035774323	0.023248717	0.023238189	0.020702489	0.019244585	0.019437777	0.021890368	0.029003797	0.029480613	0.030523216	0.026709632	0.023463834	0.01732568	0.025742517	0.013633526	0.023070991	0.024620818	0.022066182	0.022636445	0.0349462	0.048983106	0.021922755	0.014810145	0.034223974	0.032416313
cg09102017	0.037845294	0.038779739	0.048062323	0.043777522	0.060000329	0.050749663	0.054176253	0.037606292	0.046989641	0.04863377	0.049499192	0.060079677	0.049177006	0.063969191	0.043510744	0.029471609	0.053785122	0.050102965	0.051904089	0.06874612	0.032030261	0.056793354	0.0578626	0.056270421	0.060606067	0.053055975	0.049382899	0.064546675	0.043357052	0.050818251	0.043885425	0.048983796	0.051688808	0.05088193	0.042270685	0.057427923	0.040418928	0.052220352	0.054877968	0.039686625	0.047588084	0.044450717	0.055288755	0.066540873	0.082136594	0.058787814	0.064101633	0.050383747	0.073556402
cg15865175	0.066549907	0.072478953	0.021613732	0.047416635	0.098864944	0.067375446	0.0848916	0.065675844	0.075314907	0.083436702	0.055544944	0.062405533	0.049723136	0.063858087	0.045077159	0.048212275	0.056804371	0.042345491	0.044940716	0.044803446	0.040977871	0.055679887	0.035581264	0.049019613	0.061395806	0.053613757	0.054537727	0.046136066	0.064277031	0.050341442	0.059616553	0.082747794	0.047635514	0.060025814	0.046296358	0.065018584	0.045779559	0.040491186	0.033585741	0.069653995	0.059848371	0.052289638	0.053015394	0.054311424	0.043890592	0.039047198	0.048764818	0.028351256	0.295809791
cg22682213	0.047941994	0.032035889	0.028604438	0.024709324	0.040059425	0.061988143	0.070743757	0.028432808	0.038020999	0.032373434	0.028701658	0.04102917	0.034163927	0.040437914	0.061187761	0.024658512	0.043058029	0.034592688	0.029504114	0.041080682	0.049038747	0.035475886	0.044324363	0.02586274	0.061314527	0.017877008	0.03579965	0.014212535	0.012859097	0.043826589	0.036912574	0.017687913	0.028679099	0.025060961	0.021278478	0.033806956	0.02585453	0.025403036	0.033850169	0.032030732	0.042697714	0.033987507	0.040394739	0.04735798	0.062094549	0.099939199	0.042736822	0.036234638	0.094668083
cg25497877	0.051536168	0.051741092	0.080452723	0.041387053	0.077633788	0.079002578	0.072450003	0.055747779	0.042089682	0.033734847	0.05213135	0.052936422	0.033000671	0.044073042	0.053110198	0.038572291	0.05244623	0.03277209	0.025162016	0.048981663	0.031514039	0.043049712	0.039613598	0.032587076	0.053902551	0.032926548	0.026980288	0.034699443	0.042067662	0.043346048	0.051155208	0.045689336	0.046993409	0.035261827	0.035017617	0.042933601	0.051560961	0.042875662	0.057944722	0.052678065	0.039116554	0.038045148	0.054546114	0.045143183	0.042022117	0.042616967	0.06700167	0.038891134	0.049286347
cg23628297	0.825037601	0.770736388	0.823964096	0.891098675	0.812171212	0.777220186	0.875351214	0.788704662	0.876030198	0.920461803	0.895382226	0.881455291	0.852458175	0.877661177	0.85632551	0.884626423	0.861938509	0.895159774	0.884470099	0.888299578	0.826358962	0.863899591	0.899922909	0.867929851	0.901394633	0.847662369	0.868513206	0.916119345	0.900358189	0.856993169	0.879786777	0.840648928	0.849038725	0.870794324	0.865180907	0.803714377	0.851410443	0.887846568	0.841359259	0.823407381	0.813351541	0.866293631	0.823094417	0.50973986	0.540600544	0.584219547	0.552036345	0.624699079	0.577332695
cg06935361	0.625995966	0.683365395	0.763952817	0.659278722	0.722082572	0.628688383	0.773970003	0.739593296	0.734499382	0.729918421	0.635268646	0.711957287	0.693845621	0.72549834	0.745710928	0.751190342	0.726957068	0.737809016	0.720443161	0.757380983	0.692421909	0.743214749	0.768044398	0.733592658	0.755624718	0.767141311	0.685799435	0.751024892	0.73338435	0.725801388	0.765495589	0.694239811	0.689102186	0.723543449	0.691275557	0.70242839	0.764805842	0.764315586	0.779446539	0.755380618	0.675493376	0.768123847	0.778731074	0.785849945	0.807862922	0.903950282	0.62335805	0.802615166	0.930347545
cg16725191	0.9301225	0.898226779	0.906830194	0.93411198	0.83599385	0.86936616	0.781938296	0.886484484	0.894606725	0.942561538	0.980240764	0.859458139	0.916733469	0.919728815	0.927755089	0.937312204	0.926076462	0.921748286	0.945298032	0.908988232	0.937809655	0.920174988	0.913130226	0.925119812	0.936249494	0.942118311	0.909543319	0.906575087	0.961433297	0.923080664	0.953960748	0.901090948	0.912134387	0.979342719	0.935545822	0.931869943	0.854152802	0.929320972	0.9219892	0.935697892	0.90398039	0.863223258	0.966126225	0.727317851	0.864047029	0.748800527	0.820379678	0.789128851	0.610317238
cg05152925	0.040704312	0.032768278	0.042922576	0.02404822	0.033702722	0.086247344	0.042221022	0.034867093	0.037212802	0.026854388	0.033843231	0.036584975	0.043045108	0.031677667	0.016833491	0.032802276	0.048304307	0.033187718	0.044209573	0.041545727	0.027826601	0.039053835	0.039524921	0.032907035	0.026279489	0.024853299	0.038997062	0.051817355	0.028399389	0.039110867	0.031158199	0.042153392	0.040515403	0.038824305	0.035764561	0.048857156	0.027458921	0.030409473	0.022961451	0.031418906	0.042862555	0.038636853	0.034517729	0.174004583	0.140539067	0.075949973	0.074637863	0.080730617	0.072710417
cg26264429	0.027371568	0.016604151	0.017025859	0.015230371	0.04120326	0.038772384	0.016353668	0.027827899	0.019277839	0.018643786	0.032290725	0.025356383	0.021610713	0.018916079	0.022941296	0.023982628	0.02792708	0.024508837	0.025099433	0.02935731	0.020908223	0.019742562	0.029185321	0.017784869	0.031814424	0.023790873	0.018411846	0.031209115	0.014373516	0.020182026	0.030119558	0.020535399	0.03069027	0.007934933	0.021450425	0.019690378	0.011290707	0.01694142	0.021095586	0.021337784	0.023321311	0.014233673	0.022123417	0.093802723	0.091187595	0.054893699	0.006399165	0.044926305	0.031740727
cg06755612	0.031451918	0.074473003	0.070611565	0.073699332	0.064335617	0.11388378	0.09911332	0.061646903	0.082929595	0.043852069	0.06682861	0.09213859	0.068110347	0.061687618	0.062017864	0.095781514	0.070290338	0.086487842	0.068181252	0.07136674	0.060048938	0.079476011	0.081753117	0.054190899	0.102895506	0.056140556	0.068360307	0.064333107	0.060652565	0.097079649	0.064004226	0.070179376	0.105377065	0.066974408	0.045797519	0.095328462	0.068074941	0.089963394	0.055737541	0.070140471	0.057211673	0.071628484	0.107316202	0.153224136	0.071666425	0.12538735	0.057910029	0.063624531	0.152323233
cg13781510	0.074330778	0.068422975	0.082463904	0.084978987	0.14544579	0.219030803	0.150939697	0.065377203	0.086278336	0.077917393	0.06330336	0.095462998	0.069637481	0.080167416	0.072966948	0.074270626	0.079053969	0.083508337	0.065753843	0.087312874	0.068350253	0.092922509	0.097513268	0.056919142	0.127376932	0.080247356	0.089951146	0.112320594	0.060396939	0.085164626	0.067387828	0.082242027	0.152621085	0.095483067	0.071208364	0.105983298	0.052319127	0.075782428	0.079686332	0.111350106	0.071846089	0.076540254	0.104176937	0.166911493	0.120269111	0.057248472	0.081579841	0.091537871	0.226048762
cg01535380	0.081975807	0.116197354	0.131118875	0.048848449	0.080715535	0.116707211	0.162329782	0.066026128	0.064302281	0.066559328	0.039997049	0.066053731	0.053406892	0.050248057	0.056732756	0.058475208	0.056475807	0.045554898	0.060115326	0.060751317	0.046377008	0.065796921	0.075136343	0.036114989	0.074304197	0.048511876	0.073436578	0.111112223	0.06357443	0.058590012	0.053301589	0.077916858	0.079781333	0.04189097	0.044188495	0.069417746	0.048667345	0.059241223	0.059803278	0.06724291	0.043995953	0.078462582	0.08395831	0.087889766	0.086589998	0.106783298	0.072636903	0.102961574	0.09013844
cg03491181	0.077592491	0.063340874	0.053884024	0.03481611	0.066432971	0.075404968	0.061484205	0.052955269	0.063021458	0.048541328	0.058426643	0.056721395	0.051768443	0.057376343	0.052328495	0.045059734	0.063914837	0.04647013	0.042115091	0.059230962	0.052747507	0.052184625	0.054031309	0.047496544	0.051846323	0.052982223	0.069138906	0.052607018	0.045262484	0.064815517	0.063363163	0.052137561	0.07911584	0.03456599	0.027295979	0.06055087	0.064207015	0.051552659	0.041391249	0.046848723	0.05560653	0.062339137	0.094839036	0.121569046	0.058080914	0.052908515	0.030480873	0.029571279	0.069811886
cg09217565	0.058826216	0.065880487	0.102434265	0.040755076	0.096388741	0.105774578	0.1635764	0.07707206	0.089049818	0.065614425	0.052091939	0.077160524	0.06403822	0.077879502	0.086462895	0.068990149	0.081759848	0.056656311	0.055538149	0.083073052	0.060695776	0.060073904	0.082069128	0.047947231	0.078257803	0.057466213	0.063363974	0.110131679	0.058701265	0.046157719	0.053128648	0.055461474	0.085496145	0.060571858	0.091806279	0.075533713	0.066654477	0.070886277	0.056015327	0.100501169	0.068120657	0.091578766	0.102447792	0.072529351	0.044773135	0.106986637	0.055687733	0.066966515	0.05100106
cg10506402	0.06593607	0.082721966	0.076377196	0.076578731	0.081123967	0.075645626	0.087161934	0.067510695	0.073686193	0.063662356	0.058409404	0.086537625	0.066166909	0.073144721	0.058040074	0.063661586	0.075600006	0.080013012	0.079599844	0.075198528	0.061747861	0.074678214	0.075078298	0.052645729	0.081162353	0.063734001	0.077753698	0.065435538	0.065866795	0.07429084	0.056621354	0.072111705	0.084249814	0.066791875	0.052693789	0.061088443	0.070650656	0.067947231	0.06888246	0.074335514	0.074559668	0.075477988	0.075233715	0.069860808	0.074506343	0.112151507	0.10882296	0.073112563	0.094777465
cg23052213	0.129359538	0.121146013	0.116848281	0.083819265	0.109574528	0.132012219	0.10873808	0.108291998	0.115358253	0.078905457	0.082212602	0.098356419	0.081864853	0.112651046	0.08489653	0.114818903	0.100811229	0.112661684	0.093920881	0.090274824	0.106966029	0.090169328	0.104037782	0.074043314	0.112311885	0.108708151	0.105014161	0.15341899	0.068514913	0.092768069	0.113302991	0.099015149	0.098845295	0.086589475	0.080683847	0.098492099	0.116505805	0.088019597	0.099255534	0.109710176	0.075555697	0.111379867	0.118875727	0.076707688	0.075813038	0.072064223	0.179048565	0.074855806	0.100996796
cg13226139	0.032310794	0.037826768	0.036816233	0.043945038	0.080475061	0.04706215	0.044821224	0.051252905	0.036687688	0.030056294	0.040390399	0.041209634	0.03944981	0.030352896	0.041922491	0.038987903	0.038496865	0.034440095	0.040786165	0.040407236	0.029272768	0.045787821	0.049088057	0.030654999	0.032228374	0.037861757	0.039021137	0.039254784	0.035528397	0.03556307	0.044960888	0.0287772	0.038205848	0.033441806	0.036529572	0.037254931	0.031502878	0.030730495	0.035699323	0.035302109	0.02934074	0.042284271	0.04306754	0.099525524	0.034877513	0.022545399	0.029435673	0.027615015	0.045923212
cg19772317	0.093617004	0.116893789	0.151979271	0.084290563	0.220851948	0.133022011	0.156213422	0.121176788	0.106950196	0.073596527	0.07725037	0.085572988	0.115881867	0.077280206	0.045073075	0.054527504	0.107692557	0.122418758	0.100987463	0.088078888	0.062049722	0.094097689	0.051416964	0.09459268	0.110481171	0.057317808	0.100735219	0.086036447	0.051561562	0.084210075	0.07486036	0.092296421	0.139045188	0.093778289	0.058130889	0.150164061	0.075121885	0.091371837	0.077163981	0.149285499	0.094073727	0.116433581	0.141545101	0.10845824	0.13573191	0.136553382	0.122497884	0.148074668	0.100037683
cg18631948	0.027929232	0.047366067	0.032322386	0.035822086	0.062829141	0.0455831	0.041992732	0.025765643	0.041508799	0.038132664	0.045941083	0.057173064	0.036138175	0.039179165	0.040526782	0.023893191	0.031118268	0.030003258	0.043598977	0.024872783	0.032846533	0.039766267	0.043143912	0.03882809	0.039393285	0.027621957	0.045303257	0.028582618	0.035632891	0.029363352	0.039163324	0.03505276	0.035892374	0.037278539	0.044895212	0.046528896	0.036526491	0.028898076	0.033050891	0.033762347	0.032045705	0.036318841	0.036575372	0.060588212	0.042120501	0.062858163	0.060453836	0.051962547	0.063689193
cg05335832	0.031401505	0.035203426	0.026160106	0.045599151	0.038041479	0.050103278	0.035791648	0.042582737	0.031982736	0.03856061	0.040980255	0.041933257	0.029723629	0.04657616	0.03807718	0.041248946	0.04063652	0.035114737	0.032548343	0.045711927	0.039889107	0.038691889	0.039692915	0.033141513	0.031369459	0.034458217	0.053370137	0.043032527	0.04077057	0.041550031	0.036198969	0.039818568	0.043139515	0.038601308	0.027012757	0.041953914	0.0296684	0.037978814	0.055427116	0.040845007	0.032261589	0.040794883	0.043213764	0.11958366	0.044372674	0.036156721	0.127354842	0.042048272	0.049173008
cg09382430	0.071332773	0.054863512	0.070634373	0.091511618	0.09142864	0.092840525	0.083161044	0.075934827	0.070901504	0.087245426	0.089955327	0.090339516	0.074167313	0.080189583	0.082086031	0.086249265	0.093059153	0.101678203	0.08224341	0.091944145	0.06634734	0.079185735	0.124599218	0.058460957	0.082342242	0.065768564	0.066177041	0.095521195	0.078766288	0.098012528	0.076514089	0.102486003	0.090691248	0.090160763	0.068887192	0.09906061	0.031183936	0.081401313	0.081728709	0.064874481	0.078603921	0.093874386	0.109223268	0.082893026	0.064900795	0.066395581	0.115290195	0.088759012	0.099081653
cg20070138	0.918814675	0.929945317	0.935637478	0.92504512	0.890798398	0.940625568	0.837430975	0.940055168	0.912540969	0.94220095	0.928699906	0.930958069	0.943103536	0.921673624	0.935320431	0.948164536	0.940908928	0.931715737	0.930714296	0.949909501	0.947489372	0.938588363	0.953571572	0.935794939	0.937805353	0.941114919	0.929922999	0.921369046	0.943809883	0.920717174	0.928227625	0.950526113	0.93106068	0.930096574	0.924486991	0.913789752	0.933291302	0.936974457	0.93374913	0.933626587	0.946480849	0.920939481	0.934796098	0.947159794	0.920442854	0.947121588	0.886951892	0.864538458	0.955810291
cg18648982	0.839884216	0.812949648	0.852598426	0.86909559	0.911966109	0.897176609	0.932127381	0.862715135	0.866603889	0.849616467	0.84246873	0.796716643	0.843561334	0.849241994	0.82150228	0.872957757	0.834152415	0.860959628	0.857282518	0.825622629	0.845147032	0.85057351	0.789641021	0.886222666	0.857574226	0.823853592	0.860377158	0.832553339	0.891905543	0.841537577	0.860742054	0.877799183	0.884793671	0.902445289	0.867186266	0.821829911	0.898633613	0.848918012	0.912377939	0.805958023	0.873390035	0.806340804	0.862959208	0.807332429	0.744564071	0.928010461	0.721580895	0.536382849	0.872967873
cg04395431	0.857837019	0.832358979	0.884615061	0.953313712	0.741383981	0.890046099	0.876046591	0.866613117	0.903989959	0.948864298	0.95479214	0.873670521	0.896674338	0.938797509	0.907819432	0.943423892	0.953608959	0.915096386	0.961471548	0.911359706	0.913021936	0.941319838	0.929975264	0.921347235	0.909757217	0.940344705	0.899552954	0.907729154	0.942344921	0.917547456	0.837137797	0.928172088	0.863021531	0.904297882	0.910182197	0.913636408	0.86403036	0.918329109	0.958602131	0.909084305	0.942501229	0.867523152	0.936425675	0.71690376	0.736385541	0.861914812	0.764898228	0.831141943	0.811680206
cg10514594	0.920309179	0.890918989	0.915349953	0.919158279	0.912403681	0.887080607	0.885370196	0.912343672	0.925144676	0.945395492	0.943209643	0.92321186	0.933904934	0.918917277	0.9200348	0.922745955	0.937689492	0.941226539	0.907334738	0.933997114	0.934459506	0.924872147	0.94177428	0.946345226	0.919773993	0.924826287	0.938035814	0.932612648	0.943432656	0.929617004	0.923498552	0.92122962	0.867826521	0.937514904	0.929312086	0.92428944	0.927383245	0.948442522	0.935694058	0.920778241	0.957093579	0.960559699	0.931581004	0.911715459	0.912364666	0.83107545	0.924555897	0.886758499	0.922914
cg15042806	0.078282861	0.056229763	0.058121045	0.053034912	0.102081151	0.102058288	0.077903638	0.042551732	0.049219316	0.048024055	0.049927341	0.040732361	0.058165045	0.046090479	0.052828512	0.044303475	0.062290398	0.059012179	0.054188793	0.049111039	0.040020588	0.070024217	0.054365198	0.055991198	0.054852615	0.046900376	0.056784526	0.052990915	0.043448254	0.051514041	0.048517004	0.056685646	0.078305949	0.055325403	0.041603339	0.041759744	0.05777693	0.058285221	0.046281621	0.059060444	0.04282937	0.059274674	0.064414838	0.117776521	0.092251567	0.100032953	0.116584069	0.091417324	0.082409724
cg08350734	0.062728298	0.050004919	0.055067622	0.081856918	0.099494975	0.111964986	0.085769096	0.063252202	0.071599369	0.065745624	0.053502675	0.06087689	0.067745321	0.041336226	0.070143112	0.06403175	0.074030219	0.074885254	0.062123396	0.084566012	0.087444112	0.073164747	0.071813201	0.067423815	0.080874986	0.052484938	0.068321599	0.084447548	0.08063862	0.060457212	0.061202431	0.065998536	0.087272109	0.084803878	0.067985912	0.068780214	0.057232278	0.066802943	0.075806246	0.068736144	0.062281186	0.052492688	0.079647821	0.062829496	0.095288703	0.07834855	0.071766884	0.04520657	0.061913044
cg09500317	0.086049684	0.081253993	0.09191883	0.096676128	0.085818361	0.112782201	0.096802981	0.102011094	0.096062632	0.079985786	0.077628091	0.091580988	0.095852765	0.088659563	0.085669747	0.117546203	0.092313406	0.119653372	0.094165238	0.071986992	0.0927339	0.082265023	0.055726089	0.096357922	0.108724882	0.081044332	0.094845571	0.070583472	0.090106843	0.120505551	0.093621385	0.102931647	0.133339945	0.096578665	0.095523535	0.101961033	0.076277448	0.122422356	0.110777028	0.096727062	0.075932665	0.097809175	0.105024833	0.174772875	0.103116301	0.095699223	0.124944452	0.098645336	0.163054079
cg05534473	0.063349721	0.058596639	0.058391074	0.068847203	0.058451133	0.069024297	0.069132501	0.065011641	0.05767819	0.056648488	0.05836494	0.063580066	0.078073042	0.064499465	0.061924957	0.064641599	0.077564185	0.052440622	0.059532753	0.060377147	0.058350018	0.051915988	0.06362238	0.060721894	0.059733768	0.067417237	0.056260599	0.086040725	0.057465117	0.070208904	0.070212887	0.064512888	0.078297664	0.074130919	0.06054782	0.07606366	0.056225158	0.058410005	0.066865492	0.070007216	0.050704153	0.062108885	0.070067143	0.108560842	0.098276616	0.109753692	0.095108022	0.098114085	0.080703477
cg16426870	0.034295857	0.03924584	0.037464848	0.032938889	0.059390741	0.056176815	0.03518641	0.027700374	0.041447205	0.034395912	0.031436858	0.038015876	0.032970678	0.035150732	0.031818808	0.042162816	0.055838917	0.037434315	0.04728509	0.026806404	0.038431423	0.040864448	0.023219033	0.018834645	0.029624083	0.022502454	0.03139378	0.020652644	0.03238346	0.040025869	0.024424835	0.026583837	0.055491879	0.029053742	0.026829715	0.046305121	0.021596207	0.036666482	0.025506112	0.034279269	0.024157009	0.027750822	0.038642361	0.035026908	0.03657263	0.023547535	0.033262768	0.03440403	0.030034021
cg09705885	0.013300868	0.013035834	0.005143775	0.008621224	0.021730736	0.017818379	0.013092155	0.013646246	0.018636994	0.011231078	0.006193696	0.019555003	0.018664531	0.027184976	0.017146878	0.004012837	0.01912488	0.013259604	0.01803047	0.021490154	0.009840847	0.016851395	0.022985671	0.008750592	0.037710959	0.010591229	0.015478688	0.02120209	0.008409771	0.015696553	0.016753633	0.019165869	0.018671126	0.01292645	0.011563916	0.012768536	0.016701826	0.003552298	0.00948798	0.017827433	0.012581996	0.014191049	0.007586741	0.046686487	0.00633737	0.029989177	0.004333249	0.01492383	0.012610179
cg07627390	0.073243042	0.068503765	0.060861457	0.065045054	0.113381597	0.081361296	0.057934038	0.069295342	0.068370402	0.057115998	0.07769324	0.068717334	0.067492798	0.078225943	0.056673549	0.063501162	0.069442993	0.064791701	0.058999614	0.043538829	0.06535669	0.064117165	0.058701322	0.047697181	0.063113158	0.056100251	0.063901032	0.058848854	0.047845662	0.066791235	0.058297138	0.071439572	0.098584203	0.072723083	0.054457719	0.073769514	0.04758972	0.066687393	0.052625005	0.086740512	0.050666779	0.063686566	0.066824707	0.067091291	0.07321972	0.076526112	0.070458582	0.065559337	0.057240482
cg07866179	0.016708229	0.014064028	0.010374923	0.017984641	0.01906142	0.024758187	0.020154037	0.023554968	0.015282678	0.018187087	0.020342043	0.020759886	0.009536619	0.020171043	0.011624057	0.016693671	0.034148393	0.016416775	0.021737328	0.016672421	0.014387833	0.02336019	0.018282459	0.018296853	0.025407286	0.023080086	0.009595514	0.018482877	0.016740098	0.014867799	0.024205707	0.008632618	0.02680461	0.01572124	0.022083154	0.022422317	0.01954242	0.013388028	0.012836079	0.02786183	0.02250848	0.020592552	0.016929538	0.057832963	0.014435665	0.026007937	0.020890428	0.030450811	0.026790461
cg10269081	0.085392213	0.075558496	0.066353364	0.093881319	0.07174659	0.055317102	0.086866763	0.05533387	0.077814632	0.072269185	0.087813622	0.067708828	0.054362232	0.074105975	0.075753876	0.080516467	0.068706215	0.070265535	0.108060617	0.076556656	0.07696637	0.083716721	0.073128768	0.076144701	0.077288473	0.049218409	0.072564601	0.084869542	0.070225833	0.085525067	0.070684034	0.060164607	0.094923861	0.065967762	0.054021653	0.082495151	0.048823782	0.076599983	0.061764793	0.068089688	0.066242877	0.065811791	0.079529452	0.106097299	0.063923651	0.070738816	0.181584979	0.067431241	0.077548141
cg08762306	0.202279165	0.138516027	0.184046519	0.270891744	0.170353957	0.181420156	0.168553189	0.227867573	0.254907456	0.25076555	0.308940319	0.255728271	0.22241494	0.277057052	0.254348763	0.254627147	0.219036287	0.265504494	0.230403338	0.285190432	0.255245311	0.278754519	0.231137485	0.246769911	0.244791731	0.250026594	0.223659696	0.255764996	0.277303998	0.22599191	0.19583848	0.25660877	0.228339334	0.276953605	0.256214206	0.24509442	0.201233004	0.253517784	0.230291078	0.231776338	0.24530806	0.206886811	0.230472174	0.555041258	0.469772214	0.450843421	0.37872254	0.500380663	0.400912208
cg05002041	0.214341857	0.117415186	0.177881666	0.185269139	0.215484551	0.197296775	0.218487295	0.187986253	0.192156698	0.214815026	0.197855896	0.195386759	0.179596721	0.213017415	0.193735294	0.211996703	0.195556816	0.217915857	0.229643619	0.198935014	0.18247107	0.225627867	0.213631708	0.189509746	0.203064206	0.208443117	0.189279352	0.22847065	0.214386768	0.231952231	0.195640179	0.192562269	0.221292392	0.205344799	0.17468204	0.226595225	0.180027207	0.19519751	0.192804915	0.169291799	0.174445347	0.180544081	0.212768939	0.425065292	0.394995603	0.324902685	0.439851502	0.523922612	0.488719398
cg27568561	0.033781881	0.021225229	0.022873364	0.034368919	0.047288429	0.035569776	0.029337481	0.032397253	0.028885884	0.03083822	0.036120003	0.036807415	0.020234726	0.027680532	0.030533979	0.031035324	0.035032259	0.034748524	0.021822489	0.031101351	0.030090027	0.029371258	0.032108999	0.027260979	0.030636857	0.024560782	0.027886944	0.032627015	0.032752824	0.034836981	0.02701587	0.032733664	0.037723554	0.025754949	0.024199595	0.035459332	0.026347396	0.020653838	0.030510585	0.03778534	0.026027839	0.036572301	0.034929325	0.032431577	0.040301895	0.028905585	0.030897733	0.040851189	0.04366503
cg04961445	0.097232694	0.075372599	0.081951482	0.096582195	0.103179087	0.087408518	0.111771359	0.079641388	0.070098197	0.081631385	0.102709362	0.106255324	0.088780918	0.093653046	0.07885812	0.103692305	0.103093257	0.108417838	0.088782356	0.096176813	0.078741468	0.077716256	0.096567095	0.097342776	0.084298792	0.091973054	0.092380581	0.087786489	0.079266269	0.088832588	0.084696275	0.086872996	0.101690669	0.092892877	0.096463243	0.091131568	0.070974041	0.094396399	0.088112665	0.081573086	0.093159903	0.07728546	0.10068828	0.131049212	0.113115579	0.085492245	0.164056033	0.120362804	0.093947335
cg00905951	0.02003786	0.021200984	0.021311989	0.024557809	0.02886362	0.028785544	0.035717573	0.026090694	0.024309046	0.036298581	0.028226973	0.030209012	0.024659656	0.030260803	0.029610446	0.028580414	0.038168594	0.022562312	0.025948052	0.033350518	0.021326335	0.031204438	0.033483259	0.024082406	0.024965687	0.031108625	0.038051516	0.03511004	0.016670079	0.038206238	0.02940688	0.023791829	0.033864841	0.03365251	0.018663501	0.028520951	0.031788997	0.031924149	0.025131789	0.023738681	0.022439738	0.039020045	0.028482414	0.039226918	0.039653412	0.031705859	0.031799871	0.040789603	0.050546716
cg02735133	0.053540218	0.032984999	0.02535178	0.029831768	0.046584947	0.045744937	0.044714067	0.064901832	0.044345945	0.032235605	0.032476824	0.034026597	0.04463391	0.035492279	0.045141088	0.061983175	0.046231308	0.036279707	0.04721638	0.048961402	0.032274985	0.029901462	0.039090095	0.063232383	0.033570816	0.036832612	0.046284061	0.032837362	0.065287172	0.036798066	0.03920586	0.041558198	0.03922577	0.03183294	0.03531055	0.04190191	0.026975667	0.044620358	0.03360002	0.034029187	0.038258363	0.039300824	0.04196866	0.045062893	0.06031344	0.054005943	0.04978907	0.044311503	0.077044126
cg03524104	0.063063237	0.068742363	0.045672412	0.054876348	0.096525977	0.094266772	0.057661656	0.044847487	0.076210453	0.067532117	0.060429145	0.071018121	0.039045111	0.074863115	0.063464395	0.048570385	0.059743851	0.067530805	0.043429361	0.031016473	0.071106858	0.061270393	0.045922196	0.05079121	0.066915698	0.066047635	0.057307433	0.04699919	0.048505388	0.058413454	0.04437293	0.059177049	0.059978753	0.053950447	0.054886799	0.066050416	0.033868312	0.06225868	0.049851211	0.065324777	0.038953568	0.049168131	0.072048094	0.086611697	0.090177938	0.070482736	0.108076741	0.066843576	0.103847748
cg04035070	0.046833974	0.032659746	0.011948458	0.033019811	0.055287868	0.041734363	0.033042591	0.036570012	0.035274759	0.03586007	0.02955191	0.032395636	0.024512512	0.034660918	0.048452951	0.035855327	0.036186412	0.033474246	0.025993191	0.028194483	0.026028478	0.044005057	0.040484741	0.023900121	0.051934251	0.028532805	0.022180492	0.031841237	0.009545655	0.031261262	0.030647214	0.040404554	0.033707324	0.034300984	0.022447816	0.045937459	0.037050589	0.024379641	0.021488104	0.046214192	0.01913144	0.032063965	0.052857591	0.136013441	0.062189036	0.030192866	0.080449044	0.05998634	0.2336548
cg00935351	0.684418427	0.637410766	0.743380323	0.806525355	0.756095279	0.735138285	0.783069783	0.790252307	0.785141013	0.742334281	0.802538404	0.837645478	0.761493925	0.778966713	0.791890928	0.827207887	0.795202014	0.79998744	0.797251404	0.823848006	0.706921126	0.820479252	0.786473558	0.744260035	0.785113789	0.76927687	0.775446613	0.80984651	0.786265524	0.802907996	0.722663842	0.796006454	0.75211667	0.789466676	0.760183332	0.754173185	0.846352413	0.79113653	0.760990668	0.821275824	0.765785432	0.776003885	0.794542106	0.274160366	0.308759606	0.373086137	0.353163899	0.290265164	0.31431127
cg17655614	0.362187154	0.272196453	0.405905577	0.373960252	0.38389404	0.35444538	0.333320552	0.314685873	0.275227149	0.371279766	0.336251204	0.318682036	0.336586622	0.322748499	0.283972576	0.327124363	0.364839049	0.315307358	0.292203744	0.361671892	0.352398859	0.326796931	0.300042046	0.307166987	0.367901028	0.329236042	0.364646144	0.321752504	0.319674939	0.298884003	0.331736595	0.326044994	0.375711288	0.269332497	0.35451508	0.311467916	0.309630674	0.298990301	0.30951489	0.346351568	0.360718152	0.297544081	0.31333407	0.255509945	0.128248914	0.234814876	0.288685326	0.190519106	0.150596383
cg11667754	0.179623968	0.120755346	0.14632927	0.217099582	0.10486025	0.162734868	0.142078817	0.127921343	0.151599349	0.133074513	0.208530348	0.194289054	0.162279932	0.139954557	0.175952135	0.195418206	0.169896842	0.171522707	0.157102459	0.164644363	0.158809862	0.156679327	0.179077686	0.180466117	0.164365827	0.151003519	0.19256851	0.168705445	0.141417721	0.140667687	0.179608132	0.184943785	0.1840103	0.114215668	0.16145182	0.154646407	0.148782342	0.157708287	0.140201171	0.165329719	0.207418463	0.139797403	0.190077777	0.203564479	0.108576732	0.085337082	0.16988041	0.134496885	0.105275388
cg13920367	0.200250004	0.22171835	0.200323423	0.271190781	0.190491805	0.148443317	0.18160632	0.222751476	0.186499632	0.265559485	0.210672168	0.199299462	0.217128699	0.171161168	0.198362555	0.284433793	0.194902836	0.192876682	0.251177765	0.188949542	0.469396671	0.210118448	0.175860934	0.231228588	0.249079896	0.207639404	0.170237119	0.485767452	0.167135324	0.176307314	0.242276004	0.222236361	0.176868031	0.211914414	0.215650616	0.21455842	0.166427045	0.206399638	0.158314559	0.224543071	0.209644088	0.158050918	0.194020638	0.23473285	0.144376742	0.124867813	0.209513603	0.331639847	0.175584367
cg05785947	0.05443017	0.044385381	0.045757943	0.065175621	0.04283755	0.051574262	0.072889646	0.083344607	0.092495799	0.076964178	0.056759085	0.081950513	0.061172408	0.063212893	0.075187553	0.050511491	0.068191881	0.058236069	0.054282763	0.064741822	0.083411438	0.061941076	0.025092357	0.061607818	0.082827298	0.056664783	0.056931058	0.07560073	0.055996473	0.063163869	0.052120514	0.081917038	0.096513482	0.050236155	0.084796851	0.058498742	0.043147675	0.052413784	0.051178588	0.052583669	0.086801282	0.069410713	0.077436202	0.137656239	0.065940268	0.054663048	0.127425542	0.090470957	0.090255544
cg04398983	0.116401001	0.096284366	0.085164742	0.121758128	0.083475392	0.126262644	0.090159639	0.09832797	0.1229225	0.138677342	0.11712842	0.112154328	0.116442797	0.132048922	0.116045045	0.122004771	0.125858395	0.155204819	0.127546616	0.100673203	0.09609159	0.105064415	0.081468155	0.104453565	0.127607479	0.11018618	0.089946898	0.12733644	0.116898746	0.088533804	0.152945189	0.119133685	0.122025883	0.111440867	0.118610158	0.086705858	0.098199054	0.102959598	0.114201403	0.093805895	0.139637859	0.100725148	0.132714705	0.07387872	0.145196884	0.062837491	0.126755247	0.065448252	0.09278704
cg16739895	0.035006909	0.05158556	0.044036497	0.045609046	0.035697941	0.033639487	0.028086623	0.047615264	0.045144452	0.041533629	0.037454479	0.039184988	0.026095896	0.037420786	0.05245399	0.037653915	0.041655637	0.02794822	0.031784738	0.029339046	0.037252939	0.026279603	0.035429805	0.02886737	0.056510079	0.041835386	0.050023245	0.027145536	0.031368431	0.034142254	0.040798791	0.031225345	0.045847403	0.038778865	0.033930947	0.03149076	0.033703602	0.037411627	0.037992792	0.033290891	0.036289994	0.050916329	0.051662873	0.056448554	0.071035877	0.088875844	0.084102757	0.062583232	0.086734229
cg11255163	0.058561057	0.070343154	0.095231987	0.071360464	0.052344916	0.082834434	0.078145019	0.092649707	0.085682322	0.070065423	0.118098408	0.093547249	0.080828402	0.104563781	0.078728672	0.09329917	0.092677585	0.087033633	0.098359497	0.080312379	0.074538899	0.081717008	0.083349873	0.07393778	0.12403951	0.06817087	0.075581865	0.086611748	0.06250288	0.07815282	0.073607392	0.096798976	0.090063422	0.086781854	0.073217257	0.079484683	0.063588694	0.090496633	0.07971956	0.10495213	0.095756992	0.073417951	0.140116964	0.114165334	0.085546657	0.113636592	0.233450584	0.082160146	0.080072865
cg23989635	0.070660508	0.090449391	0.119497306	0.115313746	0.098057296	0.169879725	0.088651069	0.089149199	0.10854164	0.085662227	0.123876499	0.130906738	0.100915319	0.106283005	0.102182602	0.100309239	0.137488502	0.12119837	0.084905525	0.103309253	0.10966309	0.098622093	0.107486203	0.087149435	0.127044092	0.120440795	0.099958159	0.087062685	0.088688061	0.09741423	0.107934091	0.092535605	0.115010538	0.097392821	0.082098469	0.09341802	0.084737863	0.117612064	0.115268846	0.123903905	0.10219041	0.133244165	0.155109125	0.083571687	0.08362025	0.118736005	0.208861217	0.077229427	0.114626134
cg01857829	0.077721349	0.098696019	0.067581595	0.123326732	0.104746287	0.11779784	0.096959715	0.099644621	0.103683795	0.107621324	0.128912138	0.099168168	0.095913274	0.090801074	0.117603418	0.107623363	0.112734803	0.101653736	0.090710719	0.084758961	0.086958036	0.100021458	0.120794978	0.095248562	0.10311524	0.098606198	0.10883599	0.124010956	0.082796567	0.083565004	0.129231813	0.093412685	0.107271896	0.101994751	0.098966182	0.081784209	0.062251054	0.082359929	0.09999969	0.096438352	0.14035468	0.084085503	0.095601141	0.128755102	0.110625015	0.166676034	0.142208039	0.096115035	0.134325628
cg20716119	0.13091191	0.125690735	0.19650225	0.194127837	0.090543945	0.236622112	0.104151872	0.192111218	0.167019511	0.16414237	0.173896983	0.166340753	0.180160686	0.165336134	0.157748828	0.148346858	0.183546163	0.204768678	0.158063968	0.168327768	0.163752585	0.153338125	0.169220808	0.159335276	0.201603292	0.148413064	0.147716197	0.173550434	0.129129346	0.150508165	0.186582905	0.164600038	0.182356903	0.164811055	0.133065268	0.137187381	0.167597107	0.154897419	0.199602197	0.165317817	0.175374689	0.115306698	0.146812257	0.18839777	0.068907562	0.058341399	0.202142928	0.115520598	0.10966077
cg01251360	0.532203767	0.553992749	0.568289204	0.564336882	0.622475078	0.612258437	0.498613501	0.535074788	0.502506554	0.437906358	0.602404366	0.602819826	0.579648724	0.497184922	0.538085125	0.584479672	0.619339563	0.65127848	0.532950714	0.498007085	0.584769159	0.492916352	0.525972251	0.508197456	0.598717305	0.497785165	0.542753223	0.608596987	0.536930579	0.593678055	0.600143987	0.496499043	0.503399568	0.524389499	0.516989549	0.504854697	0.477532961	0.547974512	0.54883122	0.507595893	0.597114183	0.429810578	0.522144197	0.353779205	0.121831625	0.181769103	0.394975286	0.234507399	0.120807669
cg24765079	0.809139476	0.738751946	0.841451259	0.834410765	0.823622413	0.807381281	0.84508285	0.770016454	0.754755936	0.68674452	0.860952364	0.787242195	0.817713569	0.757452289	0.809198425	0.831928084	0.85108905	0.83098127	0.738877869	0.756679749	0.808596609	0.734068649	0.783968952	0.768262414	0.801284231	0.71393277	0.754023093	0.8340436	0.743718508	0.765924932	0.81330649	0.745649082	0.840803137	0.798166798	0.709466165	0.769748816	0.729251154	0.795223345	0.815970512	0.732089244	0.831217436	0.70900714	0.775054368	0.606532088	0.204752047	0.356294722	0.525540939	0.338366747	0.188294942
cg09406989	0.775018889	0.700889173	0.692676458	0.759655659	0.780418048	0.645450403	0.747177689	0.679151985	0.774148684	0.694787887	0.728063056	0.739749443	0.752870199	0.684287524	0.736775623	0.781656426	0.7966382	0.748005334	0.692505915	0.662718789	0.707823793	0.634909445	0.74809329	0.614313272	0.691445017	0.701442032	0.718605577	0.742158113	0.67714025	0.702005941	0.8127518	0.693504036	0.739677871	0.749967422	0.571167764	0.646355042	0.621379405	0.779071907	0.683677791	0.635052666	0.800381728	0.589676588	0.768050604	0.412048847	0.195055196	0.25243633	0.425044813	0.2897123	0.462993794
cg08616585	0.68059437	0.74501378	0.715556394	0.631046644	0.74074554	0.540983165	0.72781038	0.64564797	0.658909242	0.68456463	0.613094889	0.739922271	0.645006745	0.712233431	0.737790194	0.712290034	0.710567102	0.628765735	0.69705353	0.668887802	0.720193451	0.66141516	0.694503834	0.657064835	0.651326547	0.730549512	0.659317757	0.664114816	0.709073645	0.692901445	0.653614386	0.643943368	0.719414534	0.63679473	0.66385436	0.690128215	0.757420042	0.644432462	0.730320114	0.617241073	0.637065807	0.770411021	0.741938649	0.33889541	0.802002725	0.755592298	0.73388638	0.762650236	0.570479209
cg08051386	0.970658363	0.79507706	0.866643783	0.940127579	0.826215696	0.765271926	0.834023319	0.892978353	0.881192119	0.944506165	0.931262804	0.933538481	0.950428026	0.937324848	0.904033328	0.91845424	0.899565678	0.936712135	0.947098503	0.944478585	0.90743723	0.926310129	0.946637664	0.93121932	0.895045086	0.928442154	0.911327933	0.958017662	0.934413021	0.913219876	0.942591293	0.920274013	0.877666098	0.913026012	0.925237235	0.925519423	0.912381546	0.925988608	0.931086496	0.830624517	0.940633496	0.909842605	0.921654853	0.44558253	0.333693938	0.358195436	0.376630828	0.611129494	0.348221042
cg10313337	0.482340428	0.414849617	0.401514019	0.591043608	0.504226071	0.535744215	0.509742793	0.544365477	0.419031668	0.470908515	0.485725458	0.595764763	0.526329089	0.50827446	0.491561688	0.462374071	0.534060891	0.4210584	0.383598712	0.524527489	0.47974993	0.488770588	0.406599749	0.541839139	0.544243414	0.387886598	0.590223216	0.58855418	0.450364462	0.465165441	0.515415348	0.659893972	0.510460844	0.41035771	0.512025692	0.556203414	0.530479533	0.474446048	0.401252863	0.437552148	0.601470438	0.38677904	0.516540956	0.203586392	0.431094271	0.476902066	0.355190998	0.363600013	0.259555555
cg26508465	0.881812019	0.904624536	0.761236242	0.878475526	0.764300098	0.773685666	0.782813916	0.833313251	0.867634044	0.854579784	0.866884973	0.857364129	0.861997246	0.801038473	0.851775348	0.846856584	0.858869963	0.836933854	0.848742116	0.855921164	0.869300813	0.862591116	0.860819457	0.848221453	0.828928158	0.779040938	0.830369377	0.82240064	0.824913433	0.873054389	0.887942663	0.877420825	0.851115333	0.857744598	0.861232051	0.860581795	0.841298632	0.817435009	0.848118538	0.860044217	0.867636234	0.782037969	0.873946687	0.709012265	0.8913255	0.846884114	0.857501279	0.852115422	0.659949419
cg07762788	0.875696209	0.840106355	0.791015255	0.845321751	0.816740241	0.784181498	0.807666558	0.847814551	0.893040757	0.826872936	0.867197434	0.826667279	0.898136246	0.834621002	0.85629571	0.843746485	0.806922843	0.833631193	0.811895883	0.825432421	0.839248337	0.842822644	0.795068427	0.845447708	0.827527225	0.834130482	0.85228496	0.833028537	0.837883988	0.830815166	0.841481033	0.827525076	0.794641725	0.838168762	0.867275411	0.858990384	0.842436632	0.831338569	0.812809605	0.822996605	0.853241302	0.843987183	0.845943066	0.655766201	0.825314983	0.398301903	0.627026972	0.743604542	0.54353736
cg09220040	0.926625678	0.819209093	0.906464441	0.960284529	0.919941106	0.864468205	0.912216862	0.902726549	0.918405321	0.9338388	0.946239244	0.937546926	0.921920002	0.919470505	0.932660337	0.932774225	0.934404242	0.953557143	0.938302426	0.953627964	0.948366963	0.968558414	0.954077569	0.947791748	0.897491575	0.925727717	0.928101142	0.906125717	0.917369024	0.95555578	0.929525917	0.936991201	0.901787	0.934791033	0.919138476	0.904664563	0.920846643	0.928251725	0.959052018	0.925571953	0.93153873	0.892148067	0.928691946	0.86524458	0.89613618	0.925752283	0.859875238	0.874572431	0.847939396
cg06875305	0.828630761	0.805313136	0.833837977	0.827064245	0.712876156	0.707013076	0.754210545	0.770671118	0.786290224	0.868140557	0.869268442	0.787067086	0.841278643	0.810119954	0.871631762	0.940056602	0.785031508	0.885460397	0.855553128	0.768481207	0.789743169	0.822407977	0.873255991	0.914082055	0.74273043	0.875513863	0.788985263	0.833972266	0.824053352	0.875001055	0.83290391	0.81003408	0.7883605	0.899080789	0.859833728	0.881058004	0.764324868	0.856392042	0.987346608	0.747083823	0.867415716	0.812900934	0.840895657	0.811984556	0.740829867	0.786866778	0.782921989	0.715627952	0.827942578
cg16397722	0.887345965	0.937392451	0.84872995	0.926163859	0.935884872	0.873459982	0.871542765	0.931927023	0.912562665	0.914327199	0.926489793	0.921749168	0.916912899	0.931347771	0.919380759	0.959123816	0.904500671	0.922402795	0.937136654	0.930696099	0.928248557	0.913574161	0.910905723	0.927237972	0.88413784	0.942669086	0.931255857	0.919322648	0.916919186	0.934179854	0.930175469	0.909322058	0.884205526	0.915861419	0.920643567	0.913066824	0.930988961	0.93492488	0.949856166	0.932301214	0.937840094	0.89919473	0.910830163	0.49364335	0.682723382	0.750956094	0.66031814	0.762673141	0.680919098
cg10792831	0.918487664	0.93407129	0.943880901	0.951523908	0.944968642	0.930049541	0.908325847	0.955152792	0.937924142	0.947023799	0.949715595	0.926649548	0.945125995	0.922799539	0.918577019	0.9385958	0.944616519	0.939024737	0.924411929	0.937277845	0.923030449	0.942910216	0.942999311	0.924606071	0.934113344	0.954988131	0.938993225	0.936698865	0.92958126	0.919197833	0.938872264	0.922094592	0.921092628	0.927404301	0.936655494	0.942061693	0.952923148	0.95022651	0.946679791	0.914887207	0.961585935	0.950141504	0.934298289	0.942989452	0.879258082	0.673608903	0.880485466	0.862919023	0.911326721
cg02087342	0.901146793	0.918666333	0.913090156	0.936873168	0.916318527	0.855921009	0.859447333	0.88218383	0.918982449	0.928685658	0.919697892	0.91742749	0.894813531	0.908534613	0.904572645	0.926246381	0.861555574	0.920266417	0.911556913	0.898850579	0.907057655	0.922197203	0.903950508	0.90207948	0.827539582	0.874301017	0.881910706	0.889210485	0.923272291	0.866615788	0.874393713	0.90901654	0.89437132	0.934072741	0.922796659	0.891499758	0.892397379	0.913106446	0.90845045	0.920473828	0.917449044	0.913193577	0.928085184	0.397627972	0.504863085	0.226296655	0.632228396	0.506959782	0.612374556
cg18198734	0.80079911	0.936196764	0.928844258	0.915038332	0.903322039	0.923911924	0.863030225	0.908646336	0.900208613	0.897042633	0.908894712	0.919891102	0.897271812	0.899528771	0.902226505	0.909228057	0.869504758	0.918793492	0.876401144	0.905577932	0.913158676	0.913057828	0.911003587	0.901544496	0.911102564	0.901375828	0.906453129	0.905563528	0.91785059	0.91364936	0.922761561	0.912147612	0.882324965	0.905584815	0.93085876	0.907145038	0.932292331	0.908873262	0.936448667	0.897783017	0.915431996	0.912793138	0.896217987	0.691530079	0.627295106	0.317340034	0.812996062	0.733278859	0.759708766
cg12041075	0.894873175	0.90160966	0.894206644	0.875319687	0.897023549	0.897720014	0.85411929	0.875664103	0.876027821	0.896440507	0.87011458	0.882298499	0.873783773	0.885846587	0.871079026	0.879168243	0.874784908	0.884316203	0.867902471	0.88722727	0.866885608	0.884723457	0.884452188	0.904346264	0.8661002	0.878120044	0.881649113	0.882841083	0.88962586	0.874767694	0.89606804	0.87966756	0.881684932	0.87474496	0.896695968	0.874257243	0.900332609	0.884143707	0.899327745	0.891908796	0.883703126	0.824607347	0.884237776	0.837898908	0.657346399	0.256400763	0.913035243	0.612574909	0.61184868
cg13468400	0.905780678	0.919504276	0.898016093	0.903189421	0.910195286	0.903030699	0.904473767	0.885038686	0.868284395	0.876932376	0.904139577	0.916570563	0.922638427	0.886657711	0.900609645	0.897324136	0.881949939	0.905762084	0.893606913	0.893996693	0.921159534	0.902715572	0.902194229	0.894399571	0.916523897	0.888334409	0.895401679	0.885411874	0.911683337	0.889915799	0.880640452	0.894248144	0.922509757	0.932904283	0.893282549	0.895582695	0.904035949	0.885598255	0.930816981	0.902999016	0.916613855	0.909203867	0.91935525	0.972244267	0.91942642	0.865810088	0.772541709	0.860691687	0.678515433
cg06365412	0.891660716	0.892163982	0.903943415	0.868984096	0.898606912	0.882032372	0.910102236	0.860461779	0.86924195	0.833357466	0.868059115	0.840227005	0.864054655	0.858418828	0.884600331	0.858591044	0.855282467	0.883631966	0.878080751	0.886304453	0.868467376	0.885500511	0.87749498	0.881384758	0.857036327	0.841152995	0.852968892	0.885168707	0.883152311	0.885535908	0.809933665	0.869948179	0.875502586	0.851900908	0.862980697	0.847818855	0.888712346	0.907235365	0.903799106	0.897925606	0.87355185	0.859566003	0.847627191	0.747899525	0.748079832	0.811564485	0.81908046	0.806919193	0.817209006
cg12041429	0.938398147	0.903198532	0.8922725	0.925538732	0.869150349	0.860914006	0.90919998	0.911823086	0.881875212	0.943121598	0.919749525	0.910606827	0.951017699	0.916597399	0.907779013	0.92678934	0.899738306	0.920349956	0.914751182	0.962053362	0.914566698	0.94248637	0.924094162	0.928956036	0.906209098	0.920491686	0.920882799	0.892117131	0.90911032	0.893842169	0.931474036	0.94161577	0.870927091	0.92772873	0.923871473	0.877622276	0.898198464	0.923905255	0.914384181	0.904186358	0.931995224	0.907529745	0.925269802	0.900204882	0.903523805	0.947354948	0.912698206	0.871554558	0.907924735
cg07760161	0.679372959	0.65641791	0.716813262	0.653817249	0.682634375	0.561076158	0.694902583	0.645027708	0.706697994	0.655007992	0.624388999	0.644242537	0.659548652	0.663204327	0.675185384	0.688865105	0.631493875	0.710206665	0.704544407	0.631594657	0.669523111	0.654234514	0.680859014	0.698236056	0.608595357	0.700099401	0.607917632	0.630407594	0.632743185	0.679380902	0.669575321	0.615236032	0.677389507	0.666090564	0.623044449	0.660033736	0.644309279	0.695396535	0.709381787	0.719079122	0.68995011	0.722247338	0.712814973	0.305141867	0.775910158	0.64549038	0.490477702	0.50183963	0.27231477
cg08691422	0.686382786	0.640776141	0.610276801	0.742683428	0.690758089	0.629132187	0.626554908	0.748631059	0.721090306	0.680115573	0.718651732	0.647166225	0.699732351	0.765503609	0.735410202	0.754858378	0.720170435	0.735964356	0.690300843	0.736275044	0.722087188	0.761094982	0.703178469	0.716629959	0.709447736	0.735191122	0.693806074	0.721851794	0.757378794	0.731192297	0.772731331	0.713549606	0.768724585	0.72253222	0.643981638	0.752460878	0.73925577	0.735238826	0.758212682	0.745160828	0.697050375	0.78024461	0.703751535	0.661051595	0.443155032	0.513868023	0.483688973	0.403424997	0.312991525
cg01620719	0.077940314	0.071615922	0.063389879	0.054097759	0.095742842	0.110571922	0.095633152	0.051530113	0.068952097	0.034235586	0.053337533	0.057414254	0.051894828	0.058904257	0.057039366	0.059233848	0.053996371	0.059556193	0.052615096	0.052001724	0.036905335	0.053639138	0.040577643	0.0450733	0.061038537	0.03368232	0.058900156	0.087770878	0.043702176	0.061129883	0.059679711	0.068759947	0.071359894	0.049762741	0.042564443	0.102152443	0.054393474	0.077111522	0.051567806	0.051775801	0.052780223	0.058854528	0.045569799	0.015086211	0.04860543	0.147824492	0.029901455	0.091645719	0.05725012
cg06317056	0.093948985	0.085361093	0.079945048	0.018046064	0.096183441	0.106396476	0.109150363	0.057182458	0.048562551	0.054532706	0.054566448	0.075234671	0.028380151	0.047050969	0.055796362	0.028922833	0.068183234	0.025683304	0.042540966	0.054404141	0.036422515	0.032874301	0.04892865	0.048436995	0.061756762	0.025750844	0.059592621	0.059055952	0.035513983	0.055495567	0.06618816	0.025735018	0.071233239	0.030012556	0.070700557	0.056834548	0.016479248	0.040035081	0.075299443	0.05939588	0.070853222	0.057507625	0.075003306	0.085678134	0.078941577	0.162962595	0.098884777	0.05581153	0.063779928
cg25053252	0.079455901	0.074012485	0.038972688	0.042224681	0.100256536	0.080886481	0.072890142	0.063457657	0.049643794	0.048205037	0.060311816	0.038139361	0.054738186	0.05628159	0.06384968	0.051715685	0.05620078	0.063157119	0.046446894	0.042590116	0.066522174	0.051129337	0.053388105	0.039246649	0.059837661	0.046521926	0.069132513	0.0637515	0.037560866	0.042061305	0.056465348	0.063815501	0.056088852	0.064166041	0.045471371	0.049342494	0.046932237	0.043405202	0.041742973	0.074548548	0.040808701	0.062163888	0.032626699	0.107883707	0.063999557	0.143269568	0.065167418	0.080110444	0.051342242
cg07991600	0.055890799	0.046288084	0.086008781	0.054659964	0.061677103	0.066717265	0.050365669	0.03857635	0.056746774	0.046331135	0.052940809	0.051383604	0.029566103	0.042564428	0.048121866	0.03545112	0.055372043	0.056756967	0.058996758	0.040290486	0.050887724	0.046609253	0.045772193	0.042901584	0.062483264	0.045371515	0.047011387	0.052641239	0.047076313	0.062631612	0.034480719	0.055077426	0.053922788	0.067060929	0.049390644	0.048590045	0.046456229	0.05373868	0.047716674	0.054136554	0.042770749	0.052708799	0.036083975	0.051293692	0.052355527	0.083037193	0.05181152	0.042058313	0.037526817
cg02842899	0.083404247	0.159795278	0.2023731	0.057557549	0.217307318	0.187509984	0.178665974	0.07848372	0.096407238	0.075545965	0.05798326	0.079530702	0.072315428	0.063265506	0.068554466	0.057626239	0.081795647	0.06814669	0.063845086	0.088583952	0.072663149	0.05421094	0.117295981	0.049457293	0.084581011	0.044224807	0.118145572	0.119935117	0.060707047	0.065117282	0.089819076	0.054037773	0.103824175	0.115009634	0.082252731	0.088242857	0.069724739	0.063971008	0.071325766	0.091248589	0.073955232	0.087333666	0.100042881	0.109871403	0.112676976	0.143994881	0.067801603	0.092588202	0.127419522
cg08119584	0.037021473	0.052531475	0.046175193	0.048418284	0.065041565	0.061136181	0.058949081	0.034210439	0.04826976	0.057499398	0.047391659	0.056599891	0.039766654	0.045478803	0.053049457	0.041987558	0.029272492	0.033761452	0.045636304	0.041227068	0.042343136	0.05499309	0.080886481	0.038617005	0.052785882	0.044736386	0.05457571	0.040940995	0.036631357	0.046433029	0.051019948	0.034838766	0.051210566	0.047989255	0.033879472	0.056706861	0.029072635	0.058013619	0.040041119	0.058837803	0.053908276	0.039582907	0.03963449	0.034464605	0.045616881	0.28110421	0.103220171	0.037356932	0.054413146
cg22175811	0.089314119	0.088631854	0.068953515	0.053238828	0.104512145	0.127503161	0.121388235	0.06157186	0.063104978	0.056528284	0.053670479	0.059958226	0.070325935	0.070143979	0.056538532	0.059504719	0.083987579	0.068584661	0.069775058	0.044100375	0.062303593	0.057400568	0.063341244	0.060814933	0.064461269	0.063990163	0.07963224	0.057613359	0.057466232	0.058997765	0.076023673	0.074655528	0.099459569	0.070406692	0.051623704	0.065407362	0.058434949	0.06135662	0.062264548	0.071785536	0.068008668	0.060229095	0.062536126	0.144520468	0.101444307	0.558267797	0.084215932	0.080519218	0.113296391
cg02690969	0.081754384	0.125895035	0.125093345	0.058327861	0.203352378	0.160581817	0.170863523	0.068648084	0.110921316	0.062473428	0.095166955	0.09054869	0.080279095	0.087425771	0.093117111	0.058616314	0.087946727	0.058533092	0.098892908	0.09818716	0.084987755	0.052744976	0.060624422	0.072758571	0.102289081	0.078774245	0.106263382	0.139382051	0.085782992	0.082796355	0.099231052	0.058237543	0.108210042	0.0748036	0.019323733	0.062228643	0.072655905	0.09318685	0.128605824	0.11761715	0.09180468	0.098403594	0.052768247	0.114271775	0.104477303	0.171892217	0.119846476	0.093305996	0.083763885
cg04009932	0.087973546	0.125296543	0.088969353	0.048317584	0.148457161	0.10480484	0.129804933	0.075023213	0.096559695	0.075876293	0.085622431	0.081926672	0.05393329	0.076104723	0.069002666	0.068403161	0.074256587	0.073016146	0.06673147	0.115433188	0.070681538	0.06022601	0.080151432	0.07596594	0.130287014	0.05703562	0.080269549	0.125101064	0.066777802	0.09039296	0.072413576	0.072295956	0.098719361	0.057415441	0.075386142	0.068451449	0.071618287	0.093539071	0.062329568	0.090164763	0.071087152	0.078826835	0.106369904	0.136280972	0.086108465	0.0820664	0.103992097	0.094474707	0.101262824
cg05348746	0.07648635	0.063269463	0.047513527	0.06052033	0.048206617	0.074633045	0.062584591	0.047923416	0.064663516	0.028022579	0.040050405	0.043707105	0.015927877	0.055825612	0.038384814	0.038153691	0.04805331	0.060375546	0.035264076	0.036081519	0.044515145	0.056485699	0.040910139	0.053877989	0.052809465	0.029651852	0.069993421	0.056508266	0.037156264	0.051414917	0.058019257	0.038402609	0.064092677	0.038725776	0.030804533	0.061879197	0.043426854	0.050786261	0.033659929	0.060759124	0.040679776	0.034445027	0.063736407	0.042164007	0.035262725	0.065406677	0.093193501	0.055232523	0.058965631
cg00807143	0.033442221	0.057899093	0.046187654	0.057565421	0.052363863	0.05104301	0.050001554	0.050767005	0.054471121	0.060148353	0.072163465	0.064771436	0.048282856	0.067470125	0.064385382	0.05939926	0.056639595	0.08277463	0.07276615	0.066028956	0.053596116	0.076779853	0.057869447	0.053236507	0.057673531	0.051904235	0.062649353	0.065657906	0.054948057	0.069535641	0.058868151	0.061163305	0.05914093	0.066885291	0.056652063	0.049383665	0.053984415	0.07097417	0.057234688	0.068090299	0.06306812	0.053494383	0.073415017	0.062325779	0.042796333	0.148145878	0.085253116	0.09307685	0.037245052
cg16203911	0.049966189	0.06079827	0.059172285	0.040813828	0.099035028	0.079606177	0.067315072	0.053608313	0.06078946	0.053018108	0.040158511	0.057649347	0.050729787	0.053418486	0.045556692	0.055048261	0.045310376	0.045244572	0.03767857	0.040220169	0.035164802	0.052429794	0.055102764	0.036473706	0.054665807	0.062038154	0.057210946	0.051558978	0.063354574	0.045196434	0.045528608	0.057112528	0.060554133	0.038914919	0.028549844	0.039095674	0.040165808	0.05800805	0.028242999	0.064560049	0.048226481	0.042137089	0.053542945	0.079868591	0.050077814	0.270013177	0.053572074	0.037676238	0.059475819
cg14351634	0.016808368	0.043157815	0.03663935	0.014317784	0.046003334	0.053961169	0.055638578	0.031295426	0.027346885	0.024582768	0.01833	0.026850788	0.013067597	0.037047173	0.032608358	0.01605964	0.017091887	0.03958252	0.022129053	0.020062064	0.02189673	0.008412549	0.019542914	0.012201451	0.030058528	0.029872465	0.028576909	0.034412279	0.004926023	0.035386317	0.021732804	0.015822694	0.037747911	0.019053723	0.020127499	0.028836908	0.024971232	0.014966169	0.023164343	0.028299189	0.01867515	0.020541178	0.036090759	0.013710713	0.018661589	0.068741305	0.022525041	0.029686057	0.059780297
cg25896754	0.035668884	0.023907506	0.040370769	0.032790297	0.027598823	0.062735747	0.056451332	0.059789238	0.036919957	0.038898145	0.032904094	0.044244305	0.039142459	0.039704208	0.056805528	0.034745821	0.046160345	0.042491463	0.037824033	0.045240791	0.029069521	0.032916875	0.038613458	0.037166774	0.047711616	0.029998781	0.038939925	0.042015821	0.036232952	0.028352571	0.037030013	0.042063253	0.038150693	0.031791959	0.031431274	0.037303592	0.0259533	0.042871171	0.040270655	0.03491384	0.036864858	0.033880266	0.043545525	0.055391812	0.028910187	0.493721633	0.034578844	0.030335259	0.049071178
cg12373934	0.070490262	0.081860444	0.086918682	0.077096195	0.134286346	0.160789352	0.11370916	0.07900158	0.12535417	0.07593745	0.071876063	0.102208189	0.08034462	0.065018451	0.083151079	0.088659766	0.077236411	0.057496481	0.07728453	0.114073842	0.059709262	0.093980757	0.091032684	0.091377441	0.097538486	0.079666036	0.074685448	0.0884243	0.062437773	0.071948195	0.079811025	0.07425108	0.107476722	0.056334916	0.067556892	0.101464143	0.069303654	0.092014731	0.062024626	0.07384092	0.071547928	0.077337446	0.082485537	0.118127408	0.076783116	0.355236775	0.075227798	0.069578324	0.102047313
cg26539663	0.108579068	0.112404232	0.132033062	0.147985514	0.184805847	0.173315165	0.143152215	0.122235498	0.111341794	0.12081926	0.136494796	0.141648212	0.120505605	0.118142718	0.116424671	0.135423454	0.142868277	0.144159539	0.121691449	0.13547953	0.091598984	0.137190387	0.136276712	0.117954631	0.155116594	0.115025768	0.12539411	0.13769081	0.125692744	0.153647478	0.103713139	0.148258231	0.16078164	0.12841236	0.126211661	0.141591255	0.135726912	0.146729802	0.131767779	0.122365601	0.110506292	0.12082055	0.15513883	0.192709066	0.197778921	0.258418939	0.144349012	0.113833772	0.139046972
cg23846713	0.055950264	0.035009496	0.054244503	0.043665893	0.049798574	0.041931863	0.045047934	0.031208854	0.048288048	0.031823965	0.036508552	0.046428311	0.041441253	0.033662305	0.046615361	0.047672184	0.03970816	0.039922167	0.050374061	0.042046173	0.042093364	0.040175845	0.035968837	0.035760892	0.039193252	0.034522309	0.035902218	0.042216241	0.020810287	0.047656247	0.024002098	0.030993414	0.048809893	0.037852001	0.023926218	0.048495409	0.037788502	0.036060493	0.031199497	0.035066423	0.028261163	0.040619655	0.060033333	0.055544258	0.068758233	0.064150742	0.039737852	0.048737034	0.031673217
cg17461511	0.114415215	0.124556325	0.122758728	0.051919682	0.146631078	0.155039701	0.154242094	0.066222755	0.071757042	0.081138815	0.073893681	0.041723113	0.080755786	0.075212942	0.064966472	0.059670404	0.087255751	0.076796948	0.079806444	0.043962824	0.07718753	0.073950862	0.044319156	0.092653287	0.062701965	0.04443418	0.055881737	0.067881981	0.069474617	0.068485541	0.102600331	0.082112228	0.100616476	0.078923259	0.062470219	0.079918069	0.078244586	0.054420469	0.112243662	0.08172992	0.105432221	0.074212421	0.085708222	0.308379628	0.327711754	0.290921032	0.235413785	0.271081847	0.270442159
cg02166782	0.068604099	0.051443291	0.058418965	0.069006527	0.051032858	0.057478758	0.053762217	0.060755481	0.055811508	0.049231239	0.058863823	0.074736333	0.050836152	0.064000132	0.06490772	0.074597306	0.057493287	0.071110432	0.062037494	0.067155618	0.062309676	0.068366815	0.050269301	0.058143868	0.065299628	0.057146639	0.063100107	0.076940082	0.055239357	0.057044868	0.050925881	0.068941269	0.081891794	0.0610793	0.061448251	0.086512522	0.070107236	0.064555153	0.061688339	0.053420277	0.050196506	0.06514743	0.059560241	0.120708467	0.119962024	0.07735094	0.084107912	0.07333815	0.07055071
cg15206330	0.046711879	0.045725397	0.044698633	0.059330056	0.124909974	0.09151342	0.054842207	0.045185817	0.052865994	0.063679862	0.062982735	0.065369738	0.046901747	0.076698263	0.061215289	0.053122247	0.084000074	0.062966985	0.068644452	0.058157552	0.046661508	0.067003082	0.056683574	0.041273395	0.075994984	0.048734964	0.070255643	0.059857875	0.062177397	0.062252852	0.05814611	0.073340324	0.083626893	0.053119227	0.052745141	0.080487863	0.041659148	0.06207618	0.048290688	0.057092057	0.055801391	0.046181581	0.068347514	0.055917156	0.052284732	0.063681035	0.079317388	0.086982229	0.050462887
cg02045224	0.034423497	0.045257784	0.037267138	0.041509972	0.053952869	0.03947401	0.044130749	0.033506064	0.034953308	0.035355945	0.038918675	0.053834575	0.035795828	0.035207481	0.052878844	0.04151482	0.055515611	0.042200473	0.052417887	0.035421439	0.048610441	0.041654256	0.033470342	0.036659422	0.041720627	0.037952802	0.043981685	0.055577074	0.041032157	0.050455577	0.040533526	0.05865999	0.053282055	0.042305406	0.038792838	0.058622654	0.029041123	0.046784903	0.049713169	0.039380636	0.039307668	0.037227268	0.049568708	0.166230176	0.129560802	0.07843531	0.114641949	0.095290642	0.08680831
cg21050342	0.039752725	0.040019615	0.0458069	0.069286438	0.037329163	0.049383496	0.058140191	0.037287096	0.043155315	0.043599481	0.041388626	0.031619348	0.041577869	0.039537283	0.05093814	0.042980396	0.05507009	0.041904745	0.049321487	0.046697939	0.040683458	0.044782491	0.04360903	0.039930465	0.047943053	0.041618656	0.040038654	0.049877445	0.037837971	0.049931702	0.047990317	0.040477028	0.064759626	0.035368357	0.047608124	0.045348559	0.044035671	0.04025603	0.036069451	0.034137622	0.045677292	0.038734516	0.04998984	0.11765948	0.07718673	0.072225198	0.05506437	0.074298637	0.054759502
cg18311066	0.047134657	0.048498495	0.049280605	0.044007262	0.053655202	0.059095968	0.05266503	0.051677503	0.052580646	0.038208294	0.050589734	0.054931174	0.044135856	0.050748124	0.056547081	0.048369146	0.060329926	0.059309647	0.045468441	0.061241002	0.048925572	0.045304625	0.051044231	0.051059899	0.063732512	0.048274658	0.042249801	0.053913754	0.047316125	0.041465433	0.056625031	0.051497598	0.052951546	0.053063114	0.041068603	0.055451461	0.061630096	0.050543478	0.042910769	0.053063298	0.03845144	0.047444517	0.053646606	0.079588897	0.060830866	0.035334698	0.10554996	0.063135701	0.043928225
cg05479194	0.043706368	0.043116324	0.067341124	0.056596037	0.047476465	0.059159053	0.055596469	0.031709509	0.044567724	0.03674995	0.039462598	0.046544745	0.036523662	0.038180995	0.040378154	0.03787889	0.042341674	0.029489556	0.039012368	0.052280535	0.042473451	0.038289039	0.048374166	0.042181322	0.044957654	0.024313336	0.029639797	0.05380993	0.032841485	0.055791166	0.037900958	0.031902993	0.056013245	0.056178372	0.033985928	0.038413409	0.039445988	0.039240118	0.034797978	0.041090076	0.037234739	0.046056219	0.045477419	0.063016364	0.058234688	0.089463374	0.067001512	0.056727275	0.065988945
cg06587969	0.075069163	0.057165521	0.05119739	0.034116225	0.077557083	0.050201292	0.056643819	0.052387553	0.049886301	0.056516214	0.045351566	0.049840736	0.04081089	0.037010838	0.048385118	0.042173141	0.053163006	0.045673756	0.041639717	0.046288692	0.04810725	0.047344569	0.037987708	0.076897654	0.033616266	0.044535543	0.046006946	0.047939579	0.048257453	0.048126989	0.034318843	0.048504973	0.053769633	0.053672933	0.030963473	0.059362334	0.042876288	0.042100717	0.0431995	0.043474948	0.047331311	0.046518971	0.051042787	0.138529265	0.072116204	0.101653105	0.075887857	0.090675203	0.08956764
cg02855142	0.04169077	0.044649834	0.051578969	0.044737123	0.066183536	0.055167996	0.082618065	0.031641644	0.051785958	0.047432744	0.036809489	0.040269217	0.039743691	0.047671619	0.058511043	0.037364351	0.036378252	0.044026115	0.027263527	0.028086486	0.045063829	0.032482525	0.031420923	0.042980141	0.047471669	0.033647573	0.037768429	0.047281245	0.037063089	0.038642963	0.037335997	0.04067487	0.053951267	0.038642483	0.034329846	0.041879182	0.044028534	0.037277971	0.049654601	0.049194155	0.036473569	0.033534617	0.057284892	0.125064881	0.094601739	0.07057739	0.082403609	0.089480802	0.09831057
cg16029534	0.923012638	0.924572155	0.932523697	0.934261833	0.902925938	0.936640821	0.925484991	0.93290055	0.921088069	0.927694427	0.937664718	0.940585694	0.935906926	0.917694833	0.91536688	0.921083077	0.911835746	0.937933317	0.940980193	0.942111997	0.937136169	0.940982539	0.937510008	0.930912981	0.937167626	0.931408658	0.922538763	0.937773124	0.919882186	0.923179638	0.93434872	0.922436424	0.92752828	0.936448226	0.932959218	0.930494322	0.949335485	0.932072846	0.956830184	0.93543223	0.926018045	0.909768299	0.922400319	0.801235078	0.886124322	0.914249649	0.866511815	0.878658623	0.8963651
cg27383744	0.789218236	0.763111519	0.802228541	0.798848241	0.788656828	0.770030061	0.750967215	0.832538619	0.841549567	0.81733902	0.878657038	0.852116403	0.798614559	0.832638914	0.806063186	0.844113141	0.802770805	0.800165401	0.839192763	0.816939487	0.820978425	0.834423533	0.828853399	0.80841317	0.840066492	0.816303641	0.813444214	0.803473903	0.857382452	0.812982582	0.816395792	0.80084702	0.818706229	0.81274712	0.798077296	0.812101739	0.877985321	0.81671977	0.791921125	0.800195996	0.854028176	0.829960284	0.805497925	0.506634352	0.534397084	0.753416481	0.531203786	0.556844757	0.320357274
cg07054526	0.921566607	0.963187061	0.928902751	0.925171269	0.877763464	0.853472995	0.905759824	0.905850088	0.923062321	0.91278889	0.9208098	0.905769358	0.920134864	0.918411775	0.917518798	0.909927185	0.916118004	0.916152555	0.922542976	0.900950431	0.929766943	0.920948219	0.937801585	0.930896973	0.901238844	0.940553906	0.932463087	0.911367546	0.92224947	0.920288499	0.891487983	0.91357122	0.926525651	0.923210018	0.921357644	0.901129826	0.892195856	0.929518426	0.923295408	0.923370196	0.925232568	0.915424051	0.91022015	0.773293684	0.84792253	0.692818871	0.838860015	0.82958952	0.677154547
cg14048487	0.754917866	0.72127921	0.801351456	0.826600989	0.767319795	0.72035039	0.789848873	0.773272859	0.80317437	0.805388206	0.820445905	0.833273768	0.808129172	0.778782469	0.76263549	0.776570173	0.773524758	0.803307669	0.789766714	0.828399747	0.738966945	0.789050651	0.799756881	0.762315457	0.787429001	0.785119413	0.788183501	0.772872226	0.776929768	0.758567892	0.809260493	0.78635264	0.74558146	0.808108573	0.776361466	0.747831224	0.806589292	0.80804049	0.77334573	0.799334543	0.816070641	0.821279695	0.795182823	0.387747728	0.392063068	0.502980976	0.592937004	0.388331455	0.288236521
cg13782816	0.913450798	0.774599483	0.778959668	0.903383532	0.856551496	0.739514846	0.833194959	0.880576698	0.857928217	0.909488352	0.912460724	0.897901227	0.90942863	0.896035416	0.891749825	0.879132656	0.907939947	0.878595546	0.899536616	0.82840844	0.859188732	0.948968941	0.881280147	0.907667224	0.934528686	0.837862327	0.921497679	0.869499723	0.898358673	0.879321768	0.910798362	0.874270798	0.832930514	0.958304034	0.894584269	0.882360907	0.834655844	0.90757606	0.883318643	0.881872149	0.911144573	0.796451849	0.787955975	0.904103364	0.872785344	0.855488894	0.85514166	0.77286173	0.903598556
cg04582861	0.216922257	0.161100877	0.181383752	0.267134436	0.191135051	0.242479269	0.136256406	0.187092426	0.203634016	0.174186413	0.265881628	0.262817808	0.225903677	0.199459966	0.230555095	0.215988975	0.238169856	0.210503754	0.214609267	0.261533986	0.193971372	0.229865632	0.203434198	0.222536076	0.253258714	0.165313732	0.234859829	0.240862042	0.175901372	0.29805291	0.147175384	0.255337291	0.202715694	0.273075107	0.240098556	0.250805982	0.237101519	0.221174405	0.178317719	0.222582063	0.198131843	0.153050286	0.182283042	0.424014196	0.171512907	0.09293789	0.252741352	0.354794952	0.297459129
cg12984107	0.086887562	0.084818744	0.111886704	0.123159042	0.172790221	0.17015433	0.149900176	0.10070575	0.095250406	0.090169384	0.101876598	0.098294379	0.091514166	0.097588045	0.097198428	0.107868148	0.099344747	0.112940641	0.065579722	0.147877117	0.075941435	0.096617966	0.105412037	0.116158263	0.114295393	0.098996986	0.119865896	0.193765253	0.102122422	0.308569168	0.077421981	0.140374129	0.143465761	0.222134961	0.095136453	0.146183677	0.083425841	0.104625216	0.178108166	0.109115557	0.085040264	0.099824689	0.120638161	0.394363752	0.266700634	0.248229222	0.248837716	0.422162716	0.44131163
cg19531713	0.054930749	0.061168374	0.102487134	0.112043979	0.134505727	0.095848815	0.105767245	0.076889977	0.053039575	0.077547952	0.060605893	0.084657465	0.069876738	0.078909419	0.060938884	0.077564343	0.072556764	0.078879767	0.075577876	0.113253014	0.062694774	0.062056815	0.06235303	0.052558627	0.074162815	0.058239683	0.072153943	0.164651588	0.066682011	0.283002603	0.069775264	0.099002687	0.090075725	0.214256523	0.049025578	0.088153632	0.052585888	0.091546206	0.13043113	0.081023355	0.079227782	0.117995628	0.064438064	0.537558963	0.062856745	0.06826787	0.051754162	0.463081599	0.336458462
cg08386886	0.155417615	0.141792278	0.16907945	0.154613597	0.193558739	0.204754627	0.188911895	0.149114002	0.129476559	0.136127276	0.112986117	0.138426226	0.136734226	0.135431978	0.137556525	0.14265817	0.157274859	0.130680422	0.131061302	0.145772866	0.109340688	0.139053364	0.110275097	0.117994606	0.122790382	0.115838882	0.1285814	0.173668258	0.127806343	0.266035431	0.129069174	0.15618333	0.174391527	0.185205046	0.124075817	0.148152448	0.126634332	0.14294277	0.152401886	0.199694441	0.12545825	0.092272939	0.183037961	0.537118502	0.121671131	0.188615598	0.133593859	0.520689905	0.520274708
cg08993267	0.101018254	0.113439291	0.185140189	0.068678917	0.207136974	0.196685876	0.125504562	0.07169024	0.100761661	0.089983914	0.067639047	0.087124918	0.068491804	0.085845489	0.081091443	0.070078968	0.093605045	0.116366283	0.06517399	0.09961983	0.066582732	0.076265449	0.088027569	0.083968231	0.124681577	0.101680166	0.087665715	0.124505403	0.097226758	0.249331723	0.089466086	0.119427474	0.118381506	0.200516322	0.087885889	0.104742887	0.091210959	0.083382967	0.119088966	0.121086704	0.087639569	0.095684938	0.104198158	0.728244647	0.091253089	0.064174018	0.07966326	0.554301041	0.828022813
cg24806953	0.085753153	0.091717096	0.040530979	0.051924028	0.111245472	0.095800916	0.138363783	0.055464235	0.064966627	0.062186241	0.033924116	0.058672401	0.03837795	0.012744298	0.050058155	0.040317369	0.04689096	0.051952493	0.030836377	0.04551973	0.03850924	0.044017956	0.044376725	0.019577138	0.060499164	0.037035302	0.029437455	0.108186761	0.016334952	0.178473136	0.053135338	0.047714517	0.047798838	0.112318883	0.037337371	0.053239022	0.019233759	0.056576978	0.04824133	0.054452486	0.040166928	0.050481448	0.035175759	0.456974084	0.03428321	0.10565489	0.020128693	0.412781128	0.608767307
cg20187250	0.035613577	0.054851605	0.042492667	0.041012189	0.089190672	0.062979603	0.062740698	0.037680958	0.04246595	0.038653474	0.039575034	0.044265717	0.036815558	0.038037181	0.035640539	0.032090573	0.031378503	0.0344576	0.018616673	0.037449441	0.034722105	0.042133598	0.050941039	0.026994452	0.040913579	0.035995564	0.040631505	0.055190217	0.031834505	0.167443889	0.034311181	0.02982485	0.051749528	0.101490393	0.029077151	0.05043499	0.030110655	0.036122427	0.069128206	0.052133242	0.025538081	0.047591261	0.056684427	0.410742702	0.043310128	0.040294014	0.030225505	0.360688231	0.485810263
cg15419295	0.128937445	0.158102157	0.082503827	0.07710337	0.213167092	0.16674542	0.168895701	0.091862806	0.132425941	0.090048016	0.098142394	0.105539292	0.088642469	0.103293493	0.078355758	0.097611009	0.131644847	0.106238322	0.052219564	0.07993252	0.07553001	0.072050434	0.088812705	0.093593	0.125940106	0.081713482	0.069902595	0.131007028	0.044859731	0.238735074	0.110019265	0.101587435	0.134458145	0.164292465	0.078287956	0.100665792	0.129013755	0.070117867	0.137337717	0.139344018	0.117580473	0.112239658	0.097493609	0.526202218	0.227900355	0.277579109	0.126477366	0.446037001	0.622268266
cg16963062	0.055363717	0.081569749	0.106072215	0.037048233	0.092924533	0.089793535	0.097552535	0.040937146	0.053419122	0.037937092	0.048573405	0.024471242	0.057631447	0.037948827	0.0427111	0.03988337	0.047114203	0.040045493	0.033899861	0.091145971	0.039472949	0.005638431	0.067773644	0.018107557	0.080514022	0.06723428	0.061634015	0.074821685	0.038879071	0.226450334	0.076239126	0.053660417	0.053729795	0.122920401	0.016711818	0.088023705	0.060522674	0.039790931	0.098157792	0.078006943	0.047633644	0.080694062	0.052444785	0.57702023	0.038302841	0.037846436	0.046793908	0.474961461	0.689672842
cg16630982	0.087320099	0.098187265	0.101557002	0.075011129	0.140055913	0.138944199	0.087639217	0.031530994	0.050201121	0.073630607	0.070864629	0.057564509	0.059246144	0.072031987	0.060365683	0.056631167	0.098947775	0.065122635	0.064593811	0.054669541	0.072241161	0.072312994	0.044577317	0.073511663	0.075524902	0.054540925	0.050150203	0.082611745	0.060817178	0.200365699	0.069552763	0.06400696	0.099194297	0.166217629	0.054893842	0.087828134	0.053714986	0.040862382	0.058491476	0.074442678	0.074690089	0.053802298	0.060370173	0.503945035	0.065223631	0.080400741	0.03876218	0.40441763	0.581457129
cg21253966	0.122078289	0.157241593	0.115613017	0.078647031	0.213822557	0.152210265	0.167330096	0.082746425	0.078169398	0.088090723	0.045028959	0.075268293	0.07621427	0.039711314	0.046753073	0.068545698	0.095904102	0.110698343	0.071194353	0.047611654	0.056256246	0.050096474	0.085817628	0.085865476	0.060932741	0.074694528	0.112343323	0.131804533	0.057894676	0.205605171	0.076220829	0.057405683	0.185389417	0.257994285	0.061101211	0.097731103	0.096901096	0.064994279	0.14170069	0.111949004	0.118564196	0.044411013	0.067457301	0.475373101	0.144248222	0.097908317	0.134954766	0.591382423	0.759920595
cg04110421	0.042328289	0.033487455	0.089970151	0.035959976	0.169946081	0.102621043	0.166766903	0.051031708	0.067313716	0.025073497	0.030176741	0.063873104	0.052562239	0.051641967	0.042296496	0.034232645	0.061172417	0.037941154	0.036076324	0.07413669	0.059702737	0.06548153	0.045632524	0.046281452	0.0511678	0.034622966	0.07290285	0.090347096	0.036216013	0.441705463	0.038739039	0.05144087	0.073867113	0.308701977	0.046436944	0.068749195	0.071546366	0.043746415	0.124527891	0.062708232	0.045026472	0.062131498	0.061546629	0.576026465	0.059206406	0.075386411	0.042123907	0.61237879	0.789801117
cg04658354	0.074665912	0.057910073	0.080782653	0.043165966	0.10008872	0.116865522	0.203451348	0.057030123	0.088043658	0.039135055	0.050921958	0.051269205	0.064137117	0.072312495	0.057579776	0.030636971	0.050708037	0.048488173	0.065195491	0.065793009	0.050169861	0.036314007	0.066961269	0.044254951	0.063591598	0.048507421	0.058900923	0.122041085	0.052399982	0.387190569	0.053363428	0.04924296	0.081600889	0.303479446	0.052056896	0.072671507	0.057170606	0.060878664	0.13085702	0.059572058	0.077071589	0.054076078	0.056405904	0.711381685	0.016301689	0.03967408	0.061565933	0.608625468	0.879023364
cg17301289	0.078056795	0.105466322	0.087900871	0.057277681	0.14294686	0.108629326	0.180662687	0.068665345	0.067166844	0.026939961	0.069324796	0.091937092	0.043396154	0.077412869	0.068457671	0.06847338	0.084036304	0.05792218	0.048331499	0.089612089	0.035779126	0.057404902	0.073610189	0.04670252	0.112089948	0.050950262	0.063561736	0.132647267	0.04252843	0.411818043	0.08073622	0.034332989	0.075180631	0.275192851	0.047320784	0.064025082	0.087221564	0.052574939	0.103380083	0.110099622	0.071000121	0.072984181	0.160192848	0.600509788	0.055160783	0.06152456	0.09573139	0.615424815	0.86266051
cg09441966	0.074491461	0.079364158	0.072953147	0.046865155	0.096417341	0.058492816	0.220659855	0.047722392	0.041074717	0.058672607	0.02999951	0.060274143	0.044075611	0.039212601	0.054449673	0.039617817	0.051105215	0.050909913	0.061807251	0.060343769	0.04645929	0.036286261	0.064062734	0.027041441	0.061216964	0.052546627	0.06442337	0.111946082	0.055584083	0.417511448	0.058866795	0.043596979	0.0729004	0.223936323	0.043378502	0.065582651	0.052811785	0.037530304	0.105278525	0.070878384	0.068848207	0.058847448	0.06813057	0.630624314	0.082200949	0.051082165	0.054089843	0.592213198	0.86334111
cg26891576	0.072523271	0.12345301	0.125266239	0.117498729	0.159147975	0.156679292	0.218388203	0.094742548	0.099103814	0.107382833	0.098023082	0.121926673	0.104642704	0.095164654	0.092545337	0.112890182	0.100584105	0.114162348	0.101537942	0.093758568	0.094321938	0.10667532	0.078062238	0.103680688	0.106696482	0.087768195	0.096505232	0.117982642	0.095438626	0.178251184	0.117574897	0.131938661	0.158350184	0.198157208	0.081959088	0.111206298	0.093050216	0.117214515	0.119129131	0.117737067	0.084882965	0.089548241	0.119890112	0.289185227	0.053527074	0.061682614	0.058597986	0.3306591	0.391922405
cg20760063	0.062887383	0.070723316	0.07133631	0.050338943	0.12093985	0.114244446	0.244845232	0.059247368	0.06975673	0.057725905	0.063513214	0.066981105	0.206059675	0.056210185	0.065636441	0.07258074	0.228494894	0.061738723	0.058328224	0.090869034	0.24469331	0.045187193	0.055847166	0.054184825	0.077468038	0.044809579	0.081739374	0.122506916	0.04032871	0.355044451	0.057877151	0.062242977	0.077260462	0.257036923	0.056890506	0.063421362	0.057776107	0.043358575	0.168275143	0.144881317	0.055180778	0.062599016	0.078862914	0.462057375	0.076152998	0.182458055	0.082621275	0.508378903	0.67214431
cg10893007	0.079450221	0.090573147	0.089960014	0.063588883	0.193446025	0.169209785	0.179401934	0.062201882	0.068516032	0.057951403	0.050136899	0.079243466	0.036176029	0.061210653	0.055311571	0.048688941	0.049908273	0.045942792	0.057302344	0.091031151	0.050367877	0.039952973	0.084812551	0.040221308	0.083596094	0.042370737	0.06015777	0.176677004	0.064968736	0.28502183	0.06017175	0.070208504	0.093658799	0.160130875	0.04442732	0.046345814	0.059659463	0.046941937	0.106367934	0.102596707	0.068756493	0.072787522	0.093657579	0.479082262	0.057365967	0.088112475	0.093306336	0.442560584	0.629204215
cg11126247	0.080526428	0.05717506	0.038118114	0.033361047	0.111470796	0.04490269	0.087700593	0.036348893	0.030974944	0.036671162	0.034720782	0.029170849	0.022613282	0.041147406	0.045744577	0.029745612	0.039773225	0.041287735	0.038096441	0.069622462	0.034278861	0.041458543	0.060495895	0.032679889	0.039843418	0.034586861	0.038578272	0.051498591	0.025629537	0.16672866	0.040819075	0.04019504	0.045196933	0.141711694	0.043621371	0.070376817	0.038668167	0.05967363	0.045081913	0.024578381	0.030646464	0.031623132	0.059050497	0.362236919	0.034793419	0.060621701	0.052457247	0.324100075	0.382592785
cg12182452	0.074556351	0.084518322	0.14482094	0.089298383	0.242950735	0.169155565	0.254162348	0.092587348	0.083508341	0.049069742	0.073459428	0.099505892	0.069851301	0.064758966	0.077024162	0.066614225	0.102967324	0.073928691	0.0736822	0.122174481	0.049491223	0.07081877	0.086495212	0.069423148	0.081058117	0.045637045	0.073158507	0.195658661	0.03519242	0.318070748	0.054822971	0.034635184	0.094002016	0.276201091	0.066717198	0.096270507	0.088763185	0.069962227	0.103859987	0.083014183	0.094122775	0.075113105	0.105161948	0.797537234	0.06731351	0.173435102	0.0815177	0.76219772	0.87391746
cg09831010	0.079185445	0.112858911	0.064462674	0.046895982	0.211554464	0.135847857	0.242663336	0.075703288	0.074021346	0.04933971	0.069843688	0.067890546	0.056115851	0.084319237	0.07392222	0.050598973	0.070960841	0.054995396	0.054238033	0.10898223	0.06309038	0.104847986	0.067718759	0.058332507	0.0820442	0.051382189	0.082934073	0.142696617	0.082266376	0.332199675	0.095200545	0.066042706	0.09966588	0.278933888	0.062384271	0.087672976	0.075818618	0.105387126	0.183484865	0.082161412	0.072765711	0.086257949	0.079074392	0.271690736	0.077628252	0.061751578	0.079315839	0.448244418	0.654937575
cg25067162	0.698580139	0.275832094	0.513522585	0.456847102	0.546629529	0.626674794	0.597198793	0.394858561	0.562912856	0.44538818	0.47380719	0.349450269	0.466091848	0.48003475	0.331416984	0.579455536	0.340377464	0.550467014	0.548099436	0.52033615	0.488695102	0.586007021	0.483551981	0.488794593	0.509054935	0.460178403	0.431528896	0.473750518	0.528685634	0.441812644	0.563644929	0.534680251	0.520580309	0.57895983	0.433503065	0.663470405	0.459700429	0.528255318	0.33538754	0.547752278	0.412168071	0.386971696	0.329443768	0.706751296	0.16836523	0.304649416	0.252994566	0.717464302	0.8512998
cg26276233	0.854467104	0.409399802	0.8104494	0.755924486	0.882644358	0.819914217	0.885520824	0.744220123	0.796745176	0.81680319	0.851853592	0.805234009	0.772432178	0.846396724	0.666080621	0.836823316	0.717756082	0.859350089	0.777896061	0.805125441	0.795639942	0.885216635	0.771209329	0.721364445	0.788582876	0.82547865	0.758418391	0.747652267	0.841412637	0.709873456	0.845328602	0.864713826	0.822745152	0.902776736	0.736802951	0.881362037	0.797630629	0.833732556	0.751638529	0.816423547	0.768737171	0.771362206	0.715118664	0.842679569	0.378812233	0.49899774	0.670388294	0.858725763	0.905689399
cg06001716	0.761300848	0.287672211	0.835387155	0.766922355	0.851345784	0.79398045	0.857215662	0.752442412	0.795803974	0.782246015	0.79451311	0.707330685	0.800648754	0.714959092	0.642984738	0.848755808	0.701927637	0.787088886	0.807719998	0.791257076	0.77972845	0.838834118	0.712536757	0.725895697	0.792080229	0.815917125	0.720141677	0.787320492	0.74614654	0.670770825	0.850033107	0.793556362	0.828727252	0.919942314	0.655230374	0.869103068	0.756820324	0.77167049	0.635362431	0.775265345	0.70025155	0.720603286	0.74218955	0.810774448	0.442796702	0.42443627	0.674162273	0.837344935	0.884122888
cg02286533	0.813856603	0.711424149	0.64375322	0.646582402	0.804727567	0.699575818	0.60949339	0.524155031	0.686755719	0.676967926	0.699020057	0.643644277	0.714455753	0.678241217	0.546746393	0.656711782	0.542611484	0.718884835	0.684212049	0.671167631	0.665092233	0.794520613	0.595418223	0.550701556	0.612586058	0.664142747	0.635697798	0.632221462	0.590146884	0.592654671	0.769245558	0.690681736	0.665692865	0.768805783	0.575883953	0.76076578	0.667510099	0.720670833	0.601565632	0.748239004	0.667608357	0.505158604	0.513650983	0.886610094	0.278103335	0.362622176	0.640202517	0.801997762	0.884163993
cg14947218	0.901356568	0.640579778	0.633455017	0.680731246	0.851330967	0.740461978	0.621014742	0.553849491	0.658017947	0.704822324	0.723998646	0.716104857	0.716994908	0.662721332	0.592478077	0.699874109	0.610039681	0.743770234	0.685131886	0.723679181	0.677189998	0.810445489	0.66035261	0.635815999	0.652212026	0.708506441	0.660319331	0.626266554	0.62867682	0.612117967	0.792186684	0.730943159	0.685025069	0.747979443	0.62337001	0.769360381	0.686105619	0.731032909	0.612998159	0.775999029	0.675511003	0.569374236	0.604554799	0.931782947	0.267040274	0.360486898	0.566001911	0.871758701	0.91068386
cg16006004	0.820814929	0.516323168	0.720456891	0.661093522	0.865181474	0.767787682	0.700039966	0.700192917	0.806274359	0.735656628	0.797565005	0.827478021	0.754288063	0.703694502	0.604673279	0.756719442	0.607202435	0.788940587	0.837271633	0.714068326	0.703267228	0.83953585	0.74150446	0.645241325	0.736013604	0.749599781	0.722732077	0.713425716	0.676696686	0.647574554	0.775252025	0.781841489	0.781735048	0.778508086	0.682960192	0.832385846	0.7809825	0.784137871	0.682593156	0.851711361	0.730577887	0.653264772	0.611602654	0.624302962	0.331157234	0.482613806	0.566200527	0.695308641	0.748941293
cg18372208	0.872452364	0.392814544	0.435061249	0.756158947	0.82491379	0.63319023	0.583648837	0.69363865	0.694259185	0.763373832	0.716609963	0.780543066	0.718991945	0.707558552	0.605999698	0.738569579	0.584703515	0.679376849	0.750853717	0.697586955	0.713987078	0.803671616	0.622564659	0.66265873	0.696092804	0.782393569	0.6727584	0.675052805	0.62281189	0.681305466	0.806278008	0.759940684	0.74414895	0.859275166	0.692177769	0.803621923	0.713002033	0.771819243	0.646487989	0.759739244	0.638591915	0.678466754	0.62558352	0.820469402	0.346474369	0.419296768	0.441237945	0.737774196	0.679768555
cg14687474	0.94289087	0.857589067	0.853597628	0.828663431	0.838128214	0.735360974	0.888414128	0.826090776	0.855449078	0.765458397	0.876962491	0.829805182	0.872798756	0.795335973	0.764587062	0.824949838	0.761405428	0.890248164	0.886433314	0.781721886	0.836650305	0.910733919	0.815056095	0.80730844	0.882241021	0.850554856	0.864365205	0.815552578	0.812842986	0.807552259	0.889837444	0.905710624	0.873694734	0.873035338	0.815313402	0.855046447	0.892409254	0.831309807	0.83121661	0.847635493	0.819703099	0.789902368	0.777497682	0.929976654	0.652348796	0.837219634	0.876430311	0.903181896	0.908468514
cg25288140	0.944899226	0.912694715	0.968277783	0.680376488	0.975132518	0.913035216	0.853363917	0.867059016	0.911395653	0.683863817	0.919970842	0.944021155	0.956028673	0.787413165	0.780073692	0.924914083	0.767061695	0.827526141	0.883373878	0.761639647	0.709291535	0.928287379	0.785251591	0.849802822	0.918924885	0.802372694	0.821054003	0.791740047	0.827360285	0.72084896	0.98052428	0.938993624	0.86713449	0.971857665	0.734501532	0.944711197	0.745755852	0.85825407	0.731669367	0.896091858	0.770889409	0.704502705	0.66778964	0.830176895	0.295987678	0.881882505	0.765375867	0.859999175	0.887429766
cg19454999	0.885085104	0.768956233	0.828135833	0.804533792	0.841164717	0.856340472	0.84813868	0.848614568	0.859657632	0.777167526	0.765881072	0.764735616	0.846303996	0.737596869	0.769806314	0.845129867	0.770572982	0.845056563	0.766991046	0.820261981	0.778002096	0.795477364	0.825442639	0.861399785	0.814769836	0.779907223	0.824615533	0.789369175	0.775058107	0.8027763	0.827829863	0.839291571	0.811453924	0.82735147	0.854965928	0.842395717	0.861499721	0.80889118	0.761696078	0.769017886	0.822639993	0.696609683	0.696190633	0.771165143	0.459070023	0.567993814	0.71395487	0.842443665	0.881300769
cg15065591	0.92482101	0.854639744	0.902461101	0.836545964	0.893304458	0.939270969	0.909425248	0.908672531	0.906690198	0.811600878	0.943331626	0.93361794	0.919995822	0.903491553	0.872820463	0.934605963	0.826717532	0.937894861	0.926884112	0.885177328	0.885791005	0.937415101	0.921844166	0.914922105	0.894814801	0.901325575	0.909326338	0.897402054	0.903553672	0.842827799	0.95505574	0.959042466	0.894486144	0.960009863	0.87703545	0.938210985	0.842649428	0.945096222	0.846354145	0.946056274	0.870006312	0.86679829	0.791165683	0.886537077	0.549722753	0.925868465	0.77033675	0.934860022	0.874751217
cg11529738	0.896323327	0.773469476	0.823714778	0.766108979	0.818926148	0.849346247	0.840079166	0.795527255	0.781502937	0.795493875	0.847702528	0.786444555	0.859455317	0.82718229	0.783728514	0.800978251	0.735250765	0.841738176	0.868534685	0.799976648	0.759913132	0.8226123	0.806194469	0.778266004	0.810707427	0.827938427	0.781632159	0.813861225	0.82282448	0.779443202	0.841736395	0.848090676	0.79898054	0.841309869	0.798310093	0.839999269	0.781457773	0.837922987	0.807810301	0.862322306	0.841255709	0.810676642	0.749798714	0.732466208	0.533398692	0.772401016	0.721495672	0.766329994	0.753511441
cg26370022	0.818137007	0.724173621	0.636613287	0.693450631	0.775158263	0.776923838	0.767612985	0.68793399	0.706469712	0.67204815	0.760297597	0.766369836	0.714337582	0.738702647	0.640621322	0.683081004	0.641180485	0.756509176	0.745524416	0.744589232	0.646174062	0.748605426	0.714521186	0.721229908	0.725087327	0.725116039	0.757946476	0.716993678	0.743734915	0.674726013	0.799481469	0.739214606	0.754572298	0.783580718	0.686473858	0.743579418	0.739082532	0.690600389	0.697068399	0.77069085	0.779307371	0.706480393	0.683472253	0.787350293	0.524057225	0.772724297	0.571050464	0.737993076	0.686386398
cg24900425	0.924280399	0.800498774	0.756351332	0.748426176	0.869518184	0.901289618	0.864947428	0.833529514	0.815977169	0.760929264	0.864076208	0.89247992	0.900643865	0.868655417	0.74557811	0.866762061	0.739216815	0.889801436	0.867174706	0.817081926	0.845582566	0.936951386	0.859420933	0.819773342	0.864439325	0.866663657	0.833936202	0.831557152	0.860142008	0.789661447	0.935257231	0.916375609	0.850482555	0.930572303	0.787328277	0.887143097	0.805184551	0.867514086	0.790671256	0.879636639	0.832578792	0.782477838	0.726061277	0.912146026	0.638935077	0.929611163	0.645522973	0.894608638	0.894201201
cg19442659	0.513739481	0.507772643	0.5074617	0.586290279	0.594028837	0.595909685	0.525943873	0.539137431	0.502294128	0.53718819	0.555413831	0.553910878	0.653489255	0.523023484	0.511901603	0.556679549	0.489890822	0.573253514	0.48468559	0.570404797	0.508550943	0.601779213	0.540040072	0.559613478	0.535374191	0.560351882	0.572793296	0.537734759	0.535842142	0.571364848	0.610710819	0.656681717	0.543650586	0.534244665	0.517009304	0.593203975	0.589118734	0.621617518	0.540922023	0.610142229	0.567014761	0.477737724	0.497200466	0.74351674	0.299087552	0.811439444	0.606942486	0.761211649	0.758382498
cg27581762	0.686047445	0.703687663	0.736382554	0.676636624	0.760664398	0.712575079	0.620662434	0.697205444	0.683040262	0.675152665	0.677689832	0.721012718	0.717971258	0.682133903	0.656905963	0.656157156	0.642923749	0.677827364	0.695037685	0.674963689	0.677822985	0.708357989	0.684979667	0.66971295	0.671080712	0.672148178	0.630309319	0.64996704	0.632625562	0.648721657	0.721364494	0.678616321	0.701694899	0.721913527	0.644792875	0.676896739	0.730848299	0.684973544	0.676633528	0.670814275	0.699703081	0.639729763	0.641457684	0.563146236	0.524913766	0.6774277	0.607095596	0.669256663	0.593452205
cg10609677	0.650312151	0.618271197	0.619090414	0.532917534	0.677318066	0.6371268	0.608520472	0.574425897	0.599170884	0.571174102	0.592235167	0.61397429	0.610154967	0.569826829	0.546932841	0.566769907	0.554487624	0.565509043	0.594501105	0.597189483	0.560788705	0.604235308	0.576643856	0.568914662	0.576894298	0.559770483	0.610309711	0.580680669	0.580211178	0.572293729	0.607593414	0.584043888	0.59322518	0.597415836	0.574934278	0.595022721	0.567267565	0.585843919	0.564287865	0.601474725	0.595998061	0.548029043	0.517953303	0.643238123	0.579264776	0.654011148	0.579039068	0.605509452	0.619331844
cg05815247	0.837246112	0.81441227	0.809684062	0.80010363	0.800708848	0.838752539	0.856414229	0.801887466	0.845354317	0.774487068	0.857060445	0.833644538	0.842282399	0.814592496	0.834006651	0.840917852	0.803560296	0.810191218	0.834165828	0.838782741	0.844553963	0.856705843	0.814633175	0.828102467	0.815199246	0.829855147	0.841102913	0.826793121	0.836947758	0.832744893	0.826125105	0.801470363	0.854819416	0.844282992	0.818916292	0.846683104	0.858171619	0.859292505	0.792295166	0.825440843	0.830654408	0.737635607	0.730488071	0.80469702	0.809965871	0.904466461	0.860998765	0.889862258	0.90443846
cg06973652	0.9215973	0.908761196	0.913924947	0.881144069	0.883824026	0.857117402	0.859610473	0.915357949	0.881797609	0.925391153	0.923699788	0.895882381	0.916242843	0.908839869	0.886512995	0.952119387	0.864227145	0.908773686	0.89767299	0.910018445	0.930370285	0.91626484	0.918273006	0.889073797	0.863583099	0.909544634	0.87462613	0.787028744	0.904888493	0.874822488	0.943584394	0.901786711	0.881625619	0.932742316	0.871745682	0.911133046	0.897084095	0.915906899	0.916853072	0.923966843	0.938718235	0.832859588	0.847605963	0.714905751	0.763388122	0.777463596	0.769964257	0.719976261	0.769485591
cg25738236	0.833382584	0.885458822	0.798003629	0.780481103	0.783010249	0.820261623	0.772263437	0.819542494	0.792932707	0.794997318	0.724786167	0.749325955	0.77409977	0.77885824	0.736593044	0.732668293	0.738133759	0.761806823	0.765247661	0.771813964	0.767319306	0.772610096	0.802719246	0.785061723	0.754007706	0.738959177	0.756433028	0.797127819	0.740969276	0.764206011	0.794666237	0.771363905	0.757262689	0.748688709	0.759591384	0.744047037	0.804366759	0.772173284	0.77652531	0.79760489	0.825666129	0.766483255	0.757864959	0.747823448	0.711851669	0.696392268	0.781442243	0.699248482	0.651008477
cg11964474	0.791458318	0.864279821	0.812338568	0.793488095	0.790302547	0.805912543	0.771730297	0.801472519	0.753973893	0.817888857	0.775873492	0.767091077	0.796722089	0.793330454	0.769922479	0.742758571	0.797779309	0.796453523	0.771969622	0.813526387	0.78513194	0.802469036	0.83416715	0.79152718	0.76562277	0.762040197	0.795377123	0.783929384	0.79517643	0.779721735	0.791154121	0.815101696	0.762864128	0.80094717	0.762489346	0.789958388	0.808788525	0.801017612	0.795231878	0.83686699	0.82837737	0.797145382	0.789538085	0.551003881	0.588201676	0.579689918	0.55979592	0.53811891	0.610930852
cg20185525	0.616812058	0.586780229	0.607546408	0.656943124	0.624500298	0.589531659	0.645730358	0.635093328	0.658001783	0.629326645	0.67034266	0.683528259	0.615558752	0.661200121	0.629151885	0.68627845	0.634779779	0.656366898	0.676215928	0.698597061	0.589517886	0.637607555	0.70964711	0.609659245	0.625514711	0.622782887	0.662004144	0.694566487	0.643060017	0.649146104	0.637715502	0.663154021	0.634472244	0.654792985	0.650934748	0.647768164	0.666335854	0.669981581	0.60642592	0.685897882	0.641123012	0.660867066	0.664896915	0.425284235	0.414716303	0.44636961	0.451824066	0.421954813	0.398995792
cg26879546	0.819841126	0.81167537	0.840453188	0.881365077	0.80386844	0.793604534	0.792874673	0.843235083	0.864944681	0.835336366	0.883455338	0.902533403	0.851548089	0.881619963	0.871616588	0.877312105	0.871944521	0.863982423	0.867590305	0.900998049	0.847518082	0.881635112	0.881414709	0.869406381	0.883591147	0.858933876	0.851888248	0.86036652	0.865893884	0.882345081	0.857333237	0.863859809	0.83405253	0.865180155	0.871430327	0.852139281	0.902048846	0.872209927	0.854228338	0.891802067	0.889124062	0.836871688	0.883863453	0.720317542	0.748403589	0.828232977	0.73669414	0.827744362	0.802514685
cg25112853	0.642996225	0.594659634	0.611794312	0.673890504	0.593920555	0.626536687	0.551245944	0.669874496	0.638913206	0.691978075	0.634230975	0.596312362	0.64942406	0.635771089	0.63136623	0.677526669	0.706338419	0.639969047	0.608475532	0.678205849	0.689948281	0.658381736	0.613195289	0.656073249	0.620502739	0.668342996	0.606409364	0.64266003	0.664036271	0.617097974	0.622200105	0.682245801	0.587494354	0.659622585	0.631872038	0.673465353	0.752821729	0.671986704	0.652184145	0.622345536	0.646792073	0.607386027	0.658013362	0.192740767	0.309207976	0.285383389	0.574689361	0.343789354	0.227985289
cg13900031	0.064900756	0.044181155	0.054177597	0.040304681	0.064180216	0.082648774	0.081603687	0.041625488	0.049931379	0.037922594	0.05339095	0.051527346	0.060718346	0.054670408	0.044994178	0.045367589	0.045004408	0.058384896	0.049936998	0.043915285	0.053315284	0.053528882	0.038820136	0.062673063	0.058129705	0.03979989	0.050873838	0.067856751	0.053925271	0.033080968	0.050992413	0.049143197	0.05795123	0.044232327	0.03382897	0.065792298	0.042838736	0.050240476	0.047722707	0.046539161	0.052305283	0.060464386	0.051103225	0.074739641	0.10691077	0.079218291	0.070193357	0.088135871	0.091839194
cg22585269	0.354549418	0.274638576	0.418235023	0.198015172	0.548594855	0.357312387	0.339033872	0.299467409	0.382270904	0.315467111	0.232484864	0.480703423	0.300057809	0.384311338	0.246493137	0.233873066	0.309115838	0.295690789	0.273148391	0.361438725	0.252880664	0.281838291	0.423201994	0.243293405	0.395218476	0.344752376	0.301203699	0.458901001	0.318025835	0.330753316	0.330988368	0.507128033	0.372965297	0.334593395	0.341875924	0.352157047	0.351392682	0.274239666	0.273522746	0.350500075	0.334767235	0.339572755	0.422713033	0.1617949	0.108165308	0.080014229	0.068709158	0.076296676	0.095286054
cg05718343	0.038251249	0.040019945	0.045250683	0.021535908	0.065289025	0.053263341	0.051307444	0.038718699	0.02158498	0.031270458	0.034950238	0.04340301	0.035377643	0.037314594	0.027290405	0.033389604	0.034218386	0.025591472	0.041552128	0.045996806	0.036716044	0.02826578	0.03565526	0.023914929	0.046097815	0.036499979	0.018325658	0.051367131	0.022907095	0.036063889	0.037377275	0.021688982	0.036805891	0.040662388	0.019498531	0.032045772	0.029646541	0.029431115	0.031963241	0.038417517	0.015376131	0.038829915	0.024693687	0.031028756	0.050975817	0.064405138	0.035683301	0.037001069	0.030377867
cg23369563	0.058760469	0.065205696	0.068105419	0.051775833	0.091805305	0.0584021	0.079353238	0.049258984	0.062965534	0.048840024	0.043503311	0.042389872	0.044589359	0.053136673	0.061978197	0.053417923	0.059420555	0.049913796	0.040659183	0.043169637	0.049989786	0.051040883	0.071635598	0.05645541	0.077495942	0.043479052	0.066431114	0.070014338	0.050874803	0.059548907	0.052793066	0.076861841	0.066790811	0.051916447	0.044036612	0.059082388	0.047641884	0.057811567	0.038007788	0.086198726	0.045964061	0.057526124	0.050276931	0.062525077	0.064442098	0.05026806	0.062817348	0.05019191	0.046835306
cg04776735	0.089274196	0.120032089	0.097052995	0.085176792	0.107246958	0.150461153	0.126660017	0.078178912	0.067614287	0.094455662	0.077876373	0.0648195	0.08528967	0.085677805	0.073035751	0.086803696	0.087096109	0.080428519	0.082031708	0.065301144	0.078582739	0.084572239	0.057662027	0.097433671	0.086741679	0.063023103	0.086036516	0.086110019	0.082005833	0.094796846	0.086304541	0.069436947	0.10891306	0.076147981	0.064845025	0.105510215	0.060192181	0.080426253	0.084675297	0.076148821	0.073946716	0.077897716	0.077455783	0.20138682	0.186016813	0.133548005	0.195920486	0.16284642	0.134146688
cg07364676	0.276173132	0.262045571	0.287246145	0.288275709	0.372465687	0.268547095	0.324579948	0.27900716	0.242554592	0.299054389	0.282973018	0.260515738	0.259306545	0.289095826	0.262964199	0.31788618	0.290546908	0.287762779	0.275190609	0.246449005	0.290561112	0.264690349	0.29128627	0.255188834	0.239525595	0.250638152	0.319575647	0.25418285	0.24607808	0.259159516	0.261986092	0.284631127	0.271743875	0.275403835	0.278308718	0.319645471	0.238396184	0.287044365	0.250355613	0.242696916	0.262707075	0.255014856	0.312017637	0.429254565	0.374554853	0.385788542	0.348470637	0.363223099	0.335580236
cg17257676	0.073722744	0.067851079	0.061843184	0.045671588	0.086144581	0.099210437	0.047521638	0.055920576	0.055191423	0.05078179	0.050614923	0.078958772	0.047431004	0.06028134	0.05916854	0.069136021	0.075773842	0.057962274	0.046944169	0.073232571	0.062135363	0.026334773	0.03875589	0.05246965	0.049182504	0.037571667	0.062314826	0.097833494	0.052939116	0.052284517	0.055213456	0.051771055	0.046225413	0.044962347	0.052851713	0.052113058	0.051390046	0.048190544	0.028698325	0.059117624	0.046129392	0.058076475	0.055982781	0.263746743	0.165957673	0.175741326	0.172565611	0.113850251	0.124324041
cg13497074	0.060679638	0.075946007	0.057586147	0.086685375	0.054732013	0.06816133	0.058628646	0.063799188	0.064425148	0.086525234	0.069944854	0.07111409	0.062520629	0.069039263	0.064475584	0.084151409	0.071623122	0.078088498	0.076460158	0.057896296	0.080685202	0.063938127	0.064497916	0.050223679	0.062986921	0.063157776	0.064382311	0.054721557	0.07335451	0.070385093	0.073717689	0.06554932	0.075875618	0.058731521	0.067539339	0.06720746	0.072602559	0.070208813	0.066672072	0.064096059	0.047048708	0.082557704	0.091555527	0.080104206	0.091088079	0.058855888	0.055709774	0.097249118	0.070487973
cg16247644	0.025406077	0.019551376	0.024263222	0.03142712	0.037181336	0.020274046	0.027600209	0.025554247	0.018750866	0.035483963	0.034889746	0.026956074	0.027420034	0.028351883	0.038871223	0.031535943	0.034564201	0.031722148	0.024249558	0.02869	0.026794828	0.026939954	0.031378785	0.021855536	0.026923918	0.02797341	0.025471479	0.026653749	0.019195764	0.032748671	0.022467891	0.031852884	0.02198922	0.029889021	0.027400426	0.032695956	0.029514942	0.030107747	0.018941983	0.021639611	0.024851773	0.030533246	0.036892481	0.047143524	0.044483448	0.044113911	0.040704841	0.040272783	0.044315066
cg16189954	0.046611577	0.049387976	0.048262236	0.072433423	0.04337958	0.091158333	0.048183966	0.068209674	0.068450522	0.058380311	0.070806286	0.069814248	0.05709815	0.077249832	0.079037692	0.064857309	0.061826476	0.063888409	0.060809928	0.057672349	0.053620873	0.057135689	0.071078569	0.069848391	0.060001333	0.06313183	0.062150787	0.04952272	0.047930613	0.068870383	0.069097613	0.074668563	0.069138715	0.058156181	0.054425535	0.066581356	0.043861843	0.062714122	0.058055162	0.063963482	0.061365141	0.070612406	0.104634563	0.089660051	0.117582907	0.065465881	0.053529731	0.050228651	0.037967162
cg01875775	0.070731204	0.046145438	0.057497492	0.090698609	0.05850183	0.089431718	0.062278644	0.079265434	0.070160495	0.084495602	0.083043926	0.100251367	0.061039764	0.084638066	0.085304653	0.094697402	0.090909259	0.088426684	0.091570379	0.072808309	0.072417545	0.112985111	0.092002862	0.084046132	0.097372672	0.071129708	0.085386166	0.085991032	0.076855049	0.095002647	0.088752228	0.079292066	0.09266022	0.080031083	0.094996149	0.086917471	0.067250367	0.078522922	0.09036527	0.073323467	0.07613828	0.08030266	0.0908874	0.071158437	0.059214263	0.09389306	0.081914328	0.055905253	0.264210383
cg11292385	0.089975077	0.079789297	0.079760883	0.097888191	0.087951179	0.08008909	0.07413551	0.08819231	0.083861148	0.088318807	0.098345572	0.090662441	0.084594716	0.103624637	0.089870105	0.10385172	0.126212644	0.094467626	0.096094735	0.101622239	0.106272618	0.087362121	0.088390035	0.07558738	0.085715947	0.077688624	0.083519377	0.092491398	0.090395741	0.102465858	0.093815437	0.098123304	0.10305226	0.100769957	0.072434883	0.101318787	0.073282864	0.103966782	0.082888671	0.105320726	0.071055512	0.10734574	0.100022963	0.073403728	0.066559997	0.052908473	0.06244683	0.046302795	0.072561498
[truncated: 55 more columns]
